# Supplementary material for: Late Holocene cryptotephra and a provisional 15 000-year Bayesian age model for Cascade Lake, Alaska
Source: Copernicus journal article supplement (doi:10.5194/gchron-4-121-2022), 2022-03-11
Supplement: Supplementary file 1 [file gchron-4-121-2022-supplement.zip]

Archive with 3 entries (3 files):
- gchron-4-121-2022-supplement-title-page.pdf
- SI_file_figs_final_dec2021.pdf
- SI_tables.xlsx
