# Supplementary material for: Late Holocene cryptotephra and a provisional 15 000-year Bayesian age model for Cascade Lake, Alaska
Source: Copernicus journal article supplement (doi:10.5194/gchron-4-121-2022), 2022-03-11
Supplement: Supplementary file 1 [file gchron-4-121-2022-supplement.zip › gchron-4-121-2022-supplement-title-page.pdf]

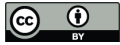

*Supplement of*

## **Late Holocene cryptotephra and a provisional 15 000-year Bayesian age model for Cascade Lake, Alaska**

**Lauren J. Davies et al.**

*Correspondence to:* Lauren J. Davies (ld636@cam.ac.uk)

- gchron-4-121-2022-supplement-title-page.pdf
- SI\_file\_figs\_final\_dec2021.pdf
- SI\_tables.xlsx

The copyright of individual parts of the supplement might differ from the article licence.
