# Supplementary material for: Late Holocene cryptotephra and a provisional 15 000-year Bayesian age model for Cascade Lake, Alaska
Source: Copernicus journal article supplement (doi:10.5194/gchron-4-121-2022), 2022-03-11
Supplement: Supplementary file 1 [file gchron-4-121-2022-supplement.zip › SI_file_figs_final_dec2021.pdf]

## File S1: OxCal age-depth model input.

```
Plot()
{
  Outlier_Model("General",T(5),U(0,4),"t");
  P_Sequence("",1,0.3,U(-2,2))
  {
    Boundary();
    Curve("Atmospheric","IntCal20.14c");
    R_Date("348.5 – 351",12690,150)
    {
      z=350;
      Outlier(0.05);
    };
    R_Date("303-304",9875,35)
    {
      z=303.5;
      Outlier(0.05);
    };
    R_Date("233.5-235.5",8270,35)
    {
      z=234.5;
      Outlier(0.05);
    };
    R_Date("197-199",6485,25)
    {
      z=198;
      Outlier(0.05);
    };
    R_Date("138-140",5085,20)
    {
      z=139;
      Outlier(0.05);
    };
    C_Date("Aniakchak CFE II",-1622,8)
    {
      z=105;
      Outlier(0.05);
    };
    C_Date("Ruppert",-515,335)
    {
      z=74;
      Outlier(0.05);
    };
    C_Date("WRAn",325,65)
    {
      z=48;
      Outlier(0.05);
    };
    C_Date("Opala",615,40)
    {
      z=37;
      Outlier(0.05);
    };
    R_Date("11-13",785,45)
    {
      z=12;
      Outlier(0.05);
    };
    Combine()
    {
      R_Date("2.6- 4.6",170,30);
      C_Date("3-3.6",1870,7);
      z=3.6;
      Outlier(0.05);
    };
    Curve("Bomb21NH1","Bomb21NH1.14c");
    C_Date("2.25-3",1901,4.)
    {
      z=3;
      Outlier(0.05);
    };
    C_Date("1.5-2.25",1930,2)
    {
      z=2.25;
      Outlier(0.05);
    };
    C_Date("1-1.5",1946,2)
    {
      z=1.5;
      Outlier(0.05);
    };
    C_Date("0.5-1",1965,1.5)
    {
      z=1;
      Outlier(0.05);
    };
    C_Date("0-0.5",1990,1)
    {
      z=0.5;
      Outlier(0.05);
    };
    C_Date("Surface",2013,0.5)
    {
      z=0;
      Outlier(0.05);
    };
    Boundary();
  };
};
```

**Figure S1:** Cascade Lake core images, lithological units, wet bulk density (WBD), organic matter (OM) and biogenic silica (BSi) data from Steen (2016).

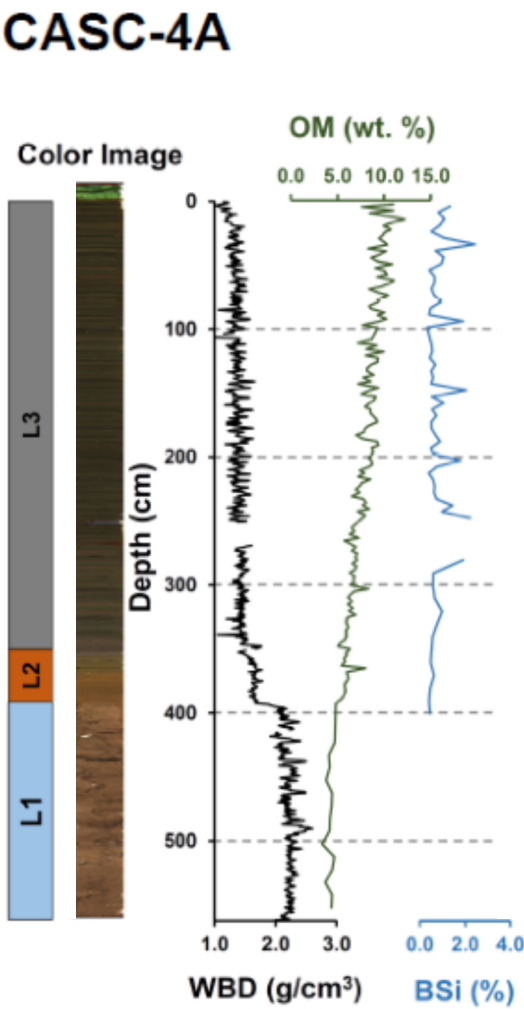

**Figure S2:** Optical microscopy glass shard images for the five unimodal cryptotephra populations reported from Cascade Lake.

**a) CL 37 - Opala**

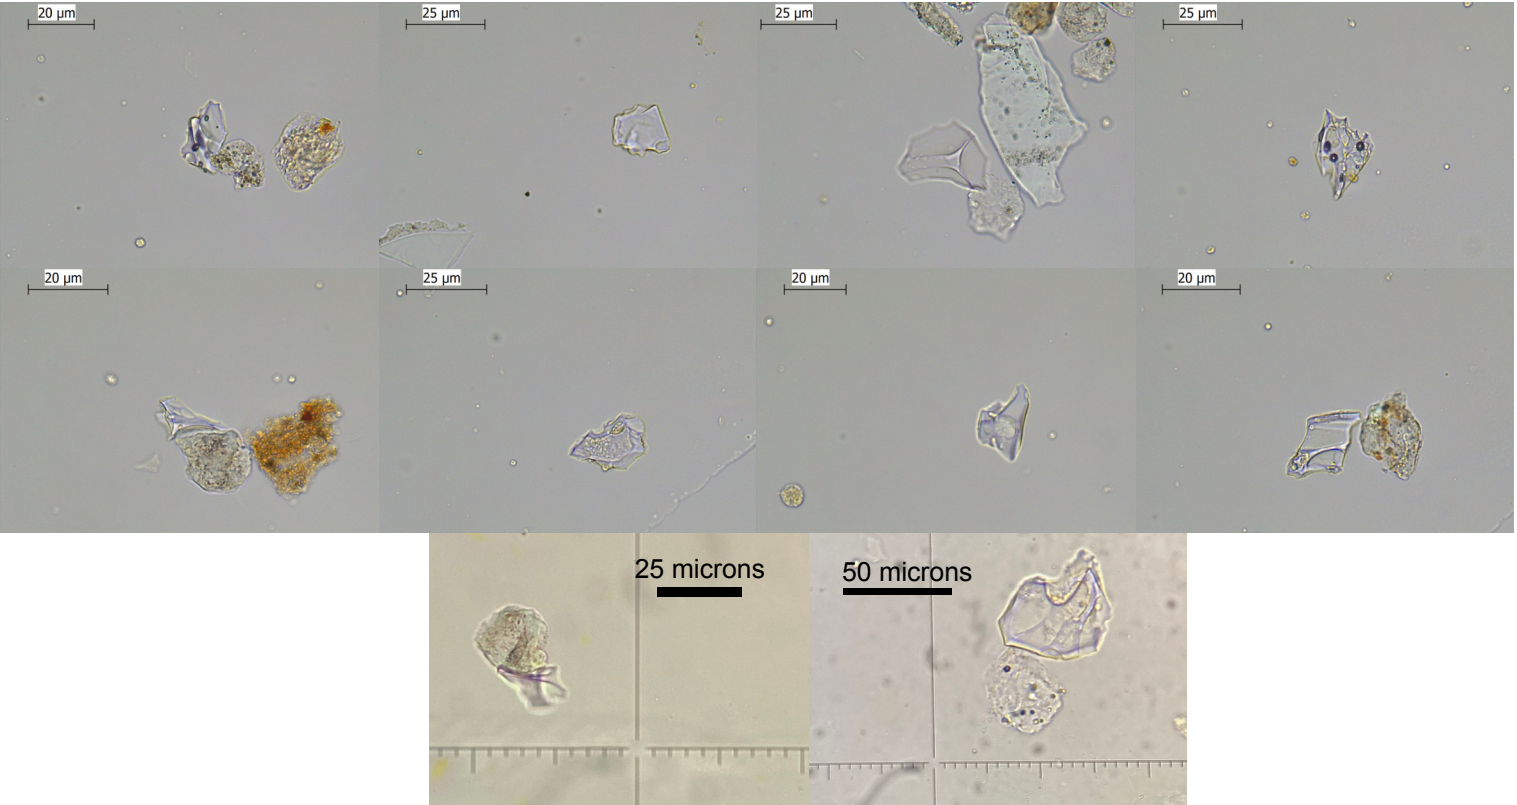

**b) CL 48 - WRAn**

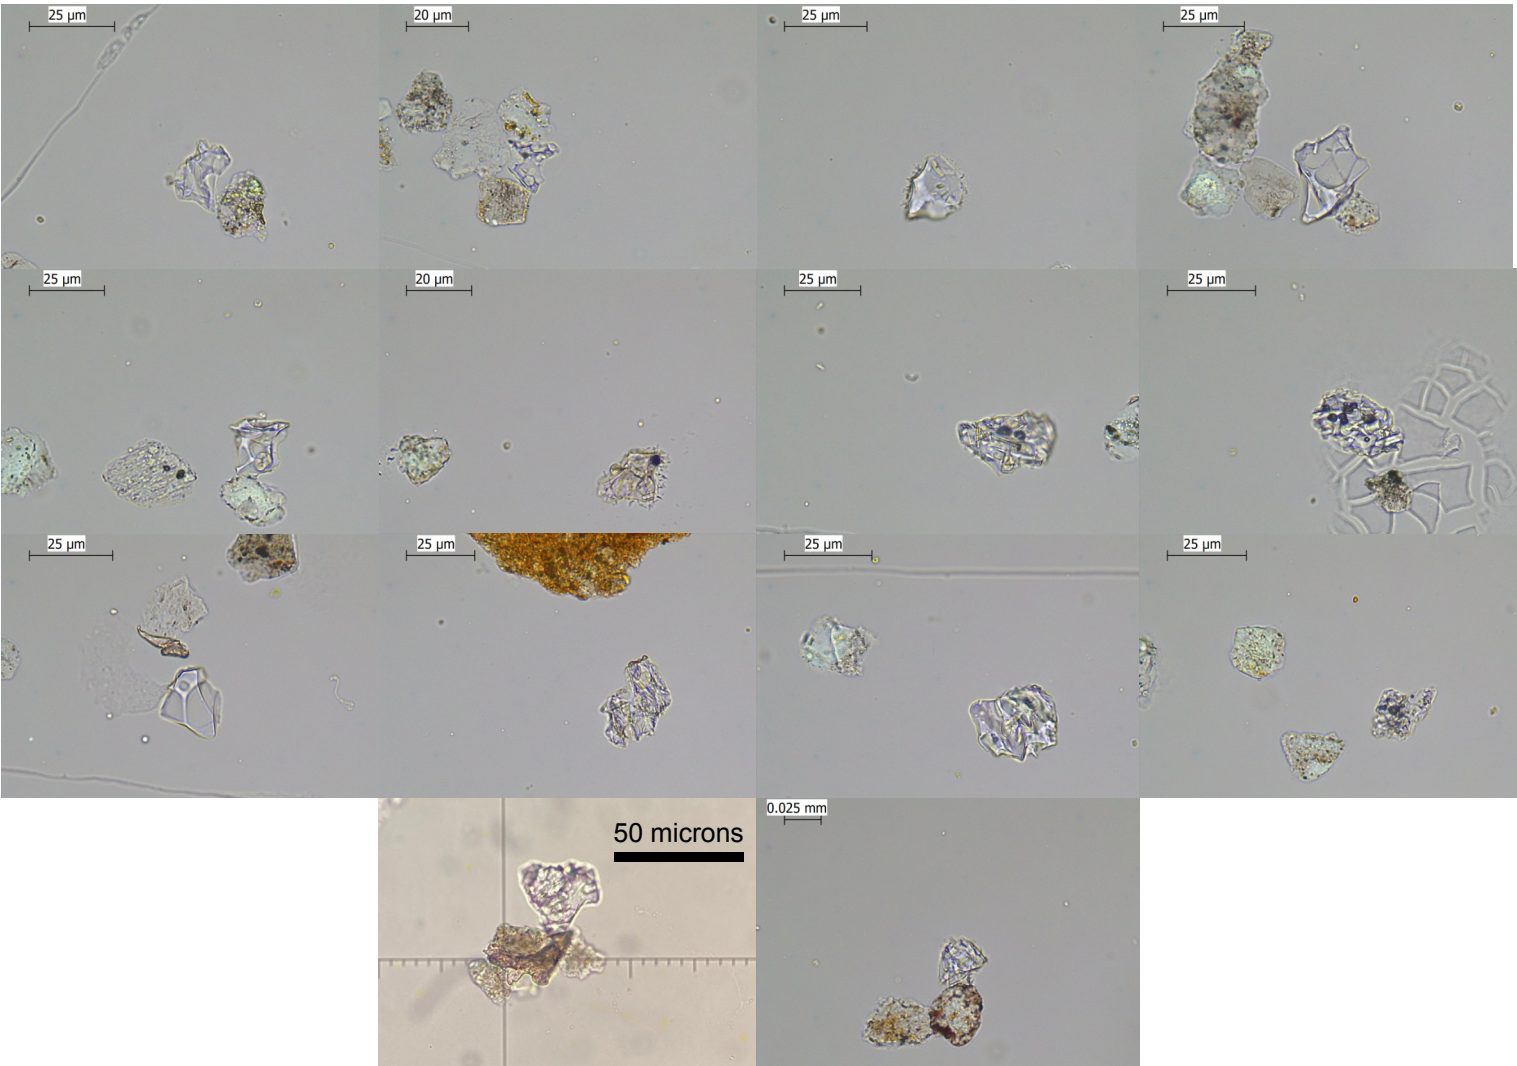

**Figure S2(cont.):** Optical microscopy glass shard images for the five unimodal cryptotephra populations reported from Cascade Lake.

**c) CL 74 - Ruppert**

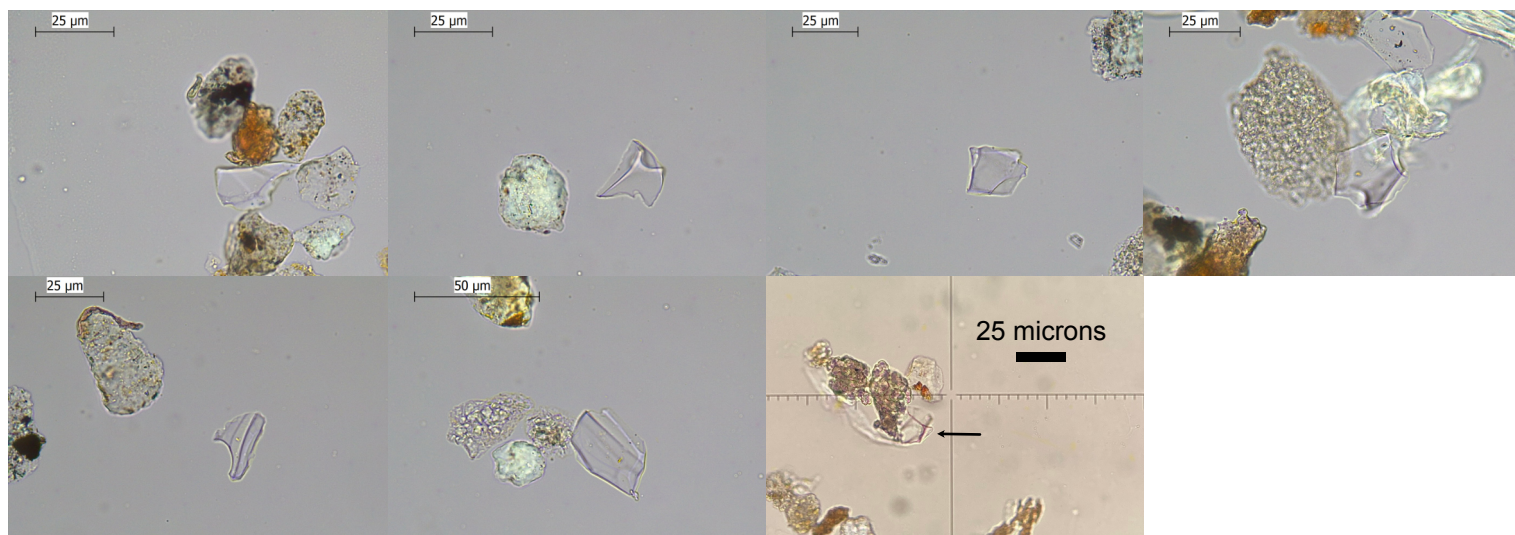

**d) CL 96 - Unknown**

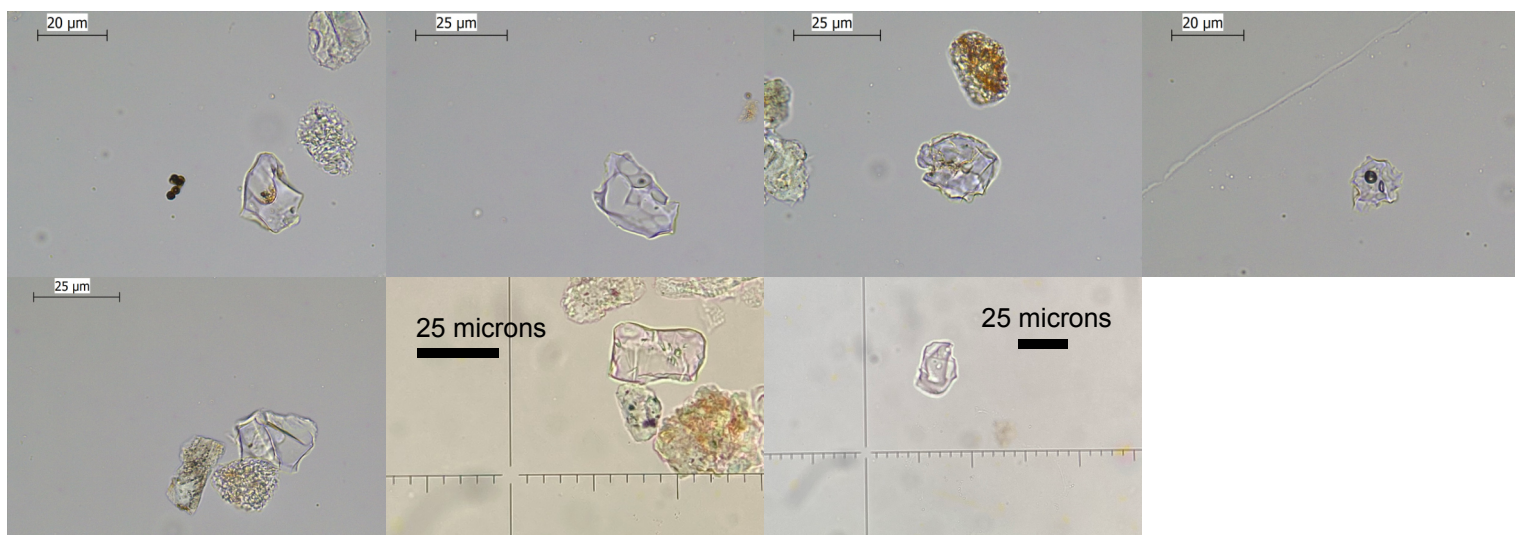

**e) CL 105 - Aniakchak CFE II**

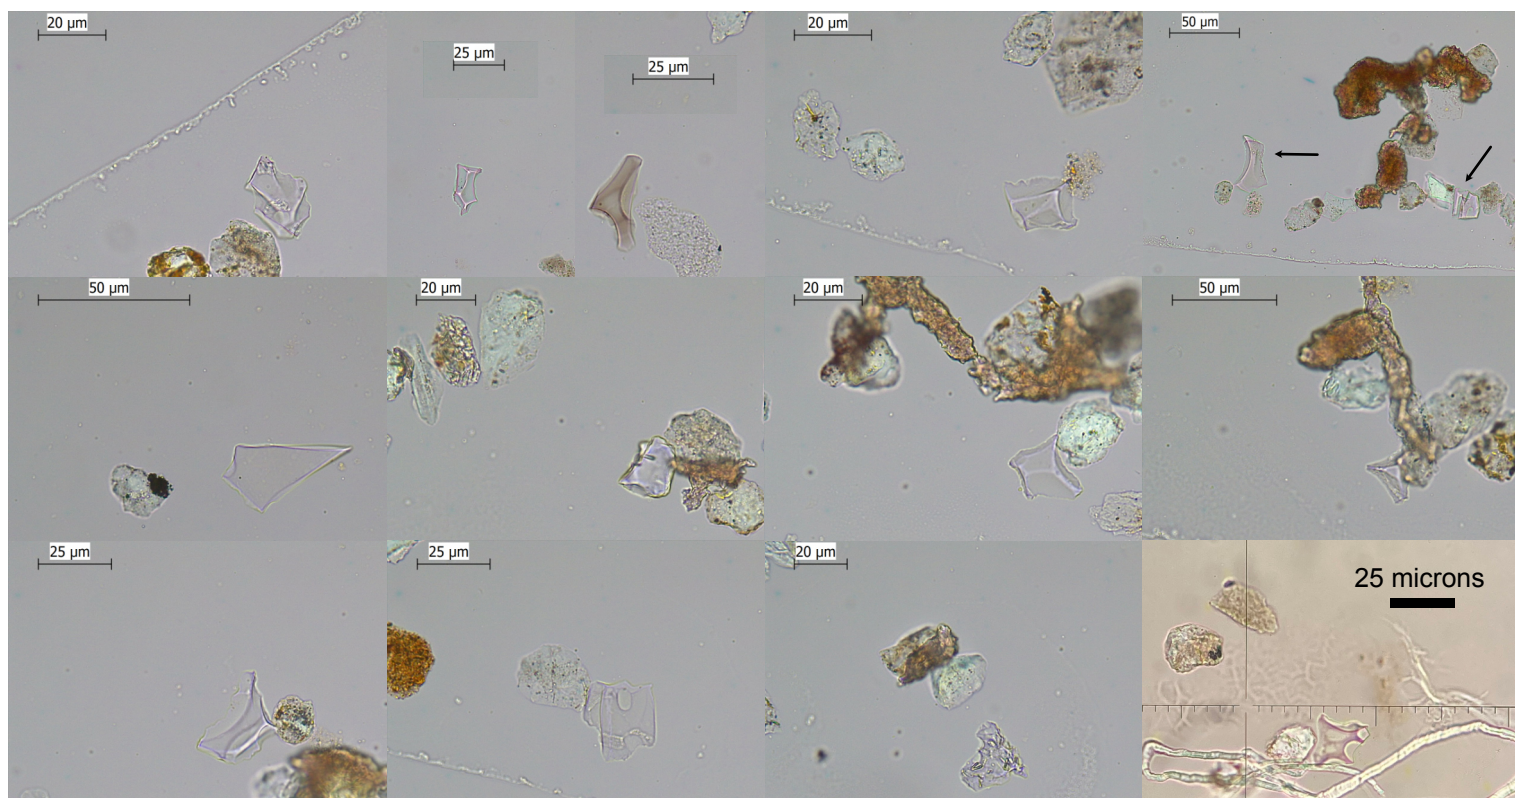

**Figure S3:** Bayesian Tau\_Boundary probability density function plots derived using OxCal v4.4 and IntCal20 for the age of Aniakchak CFE II tephra with: all  $^{14}\text{C}$  dates are included (grey right-hand distribution); two  $^{14}\text{C}$  dates removed (green central distribution); and all but two  $^{14}\text{C}$  dates and the NGRIP ice core chronology age (Pearce et al., 2017) (blue left-hand bar). See Table S5 for the ages used for this model.

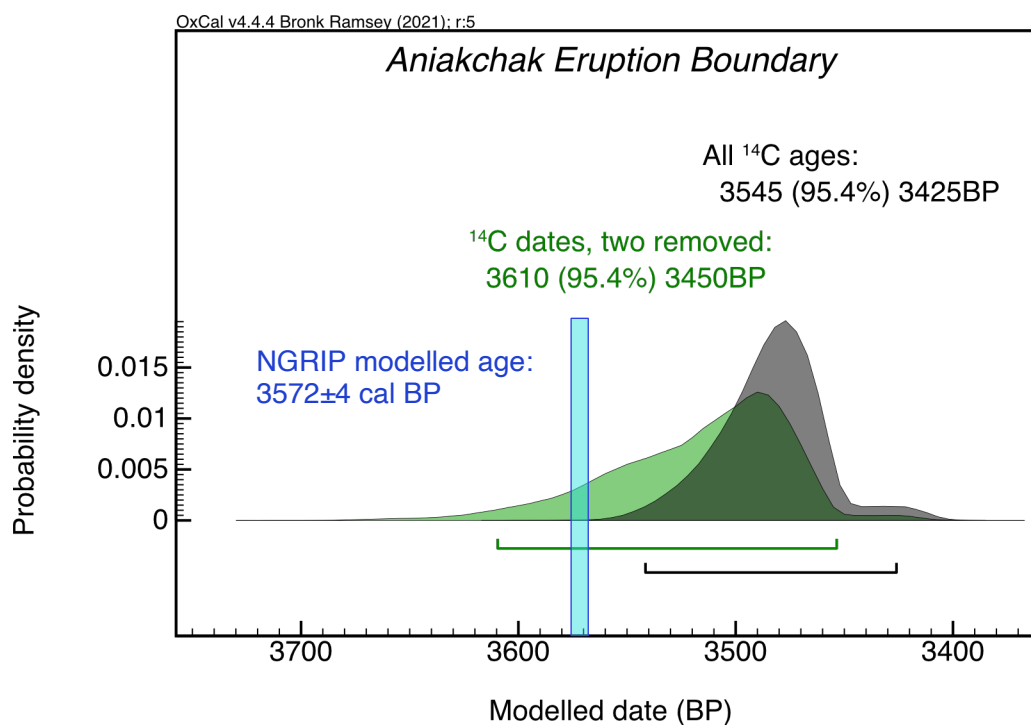

**Figure S4:** Bayesian Tau\_Boundary probability density function plots derived using OxCal v4.4 and IntCal20 for the age of OP tephra, Opala, Kamchatka. See Table S5 for the ages used for this model.

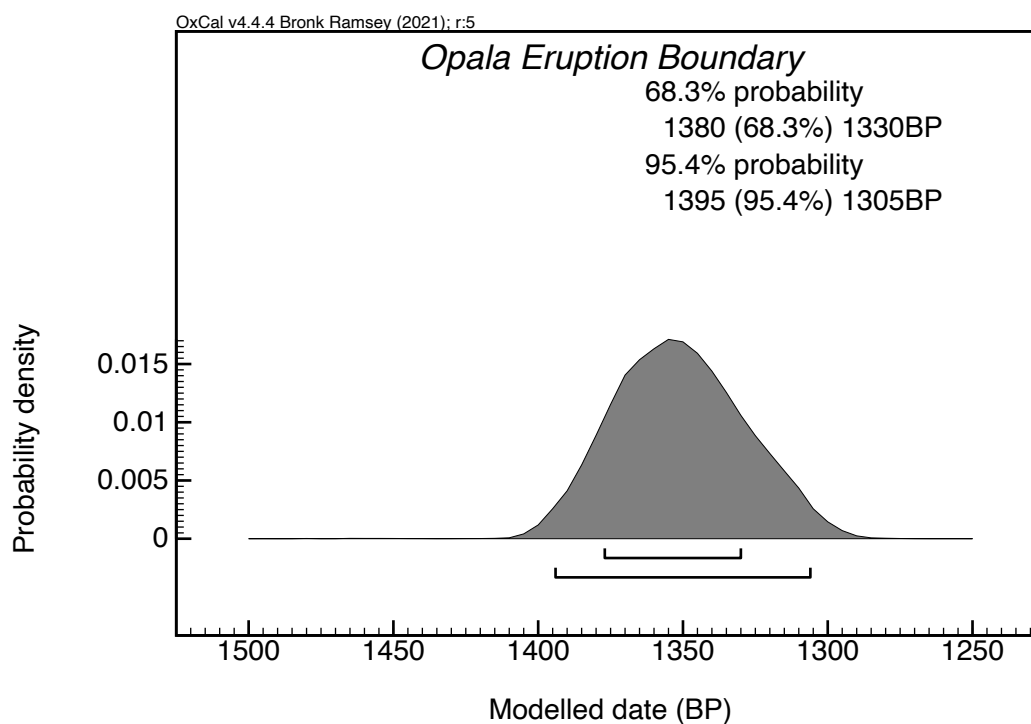

**Figure S5:** Major element glass geochemical biplots showing wt.% SiO<sub>2</sub> vs K<sub>2</sub>O and FeO vs CaO for samples with multiple geochemical populations. (a) CL-0 and CL-2; (b) CL-4 and CL-7; (c) CL-31 and CL-61; (d) CL-0, -2, -4 and -7 plotted both by sample and by geochemical correlation with a source volcano or region.

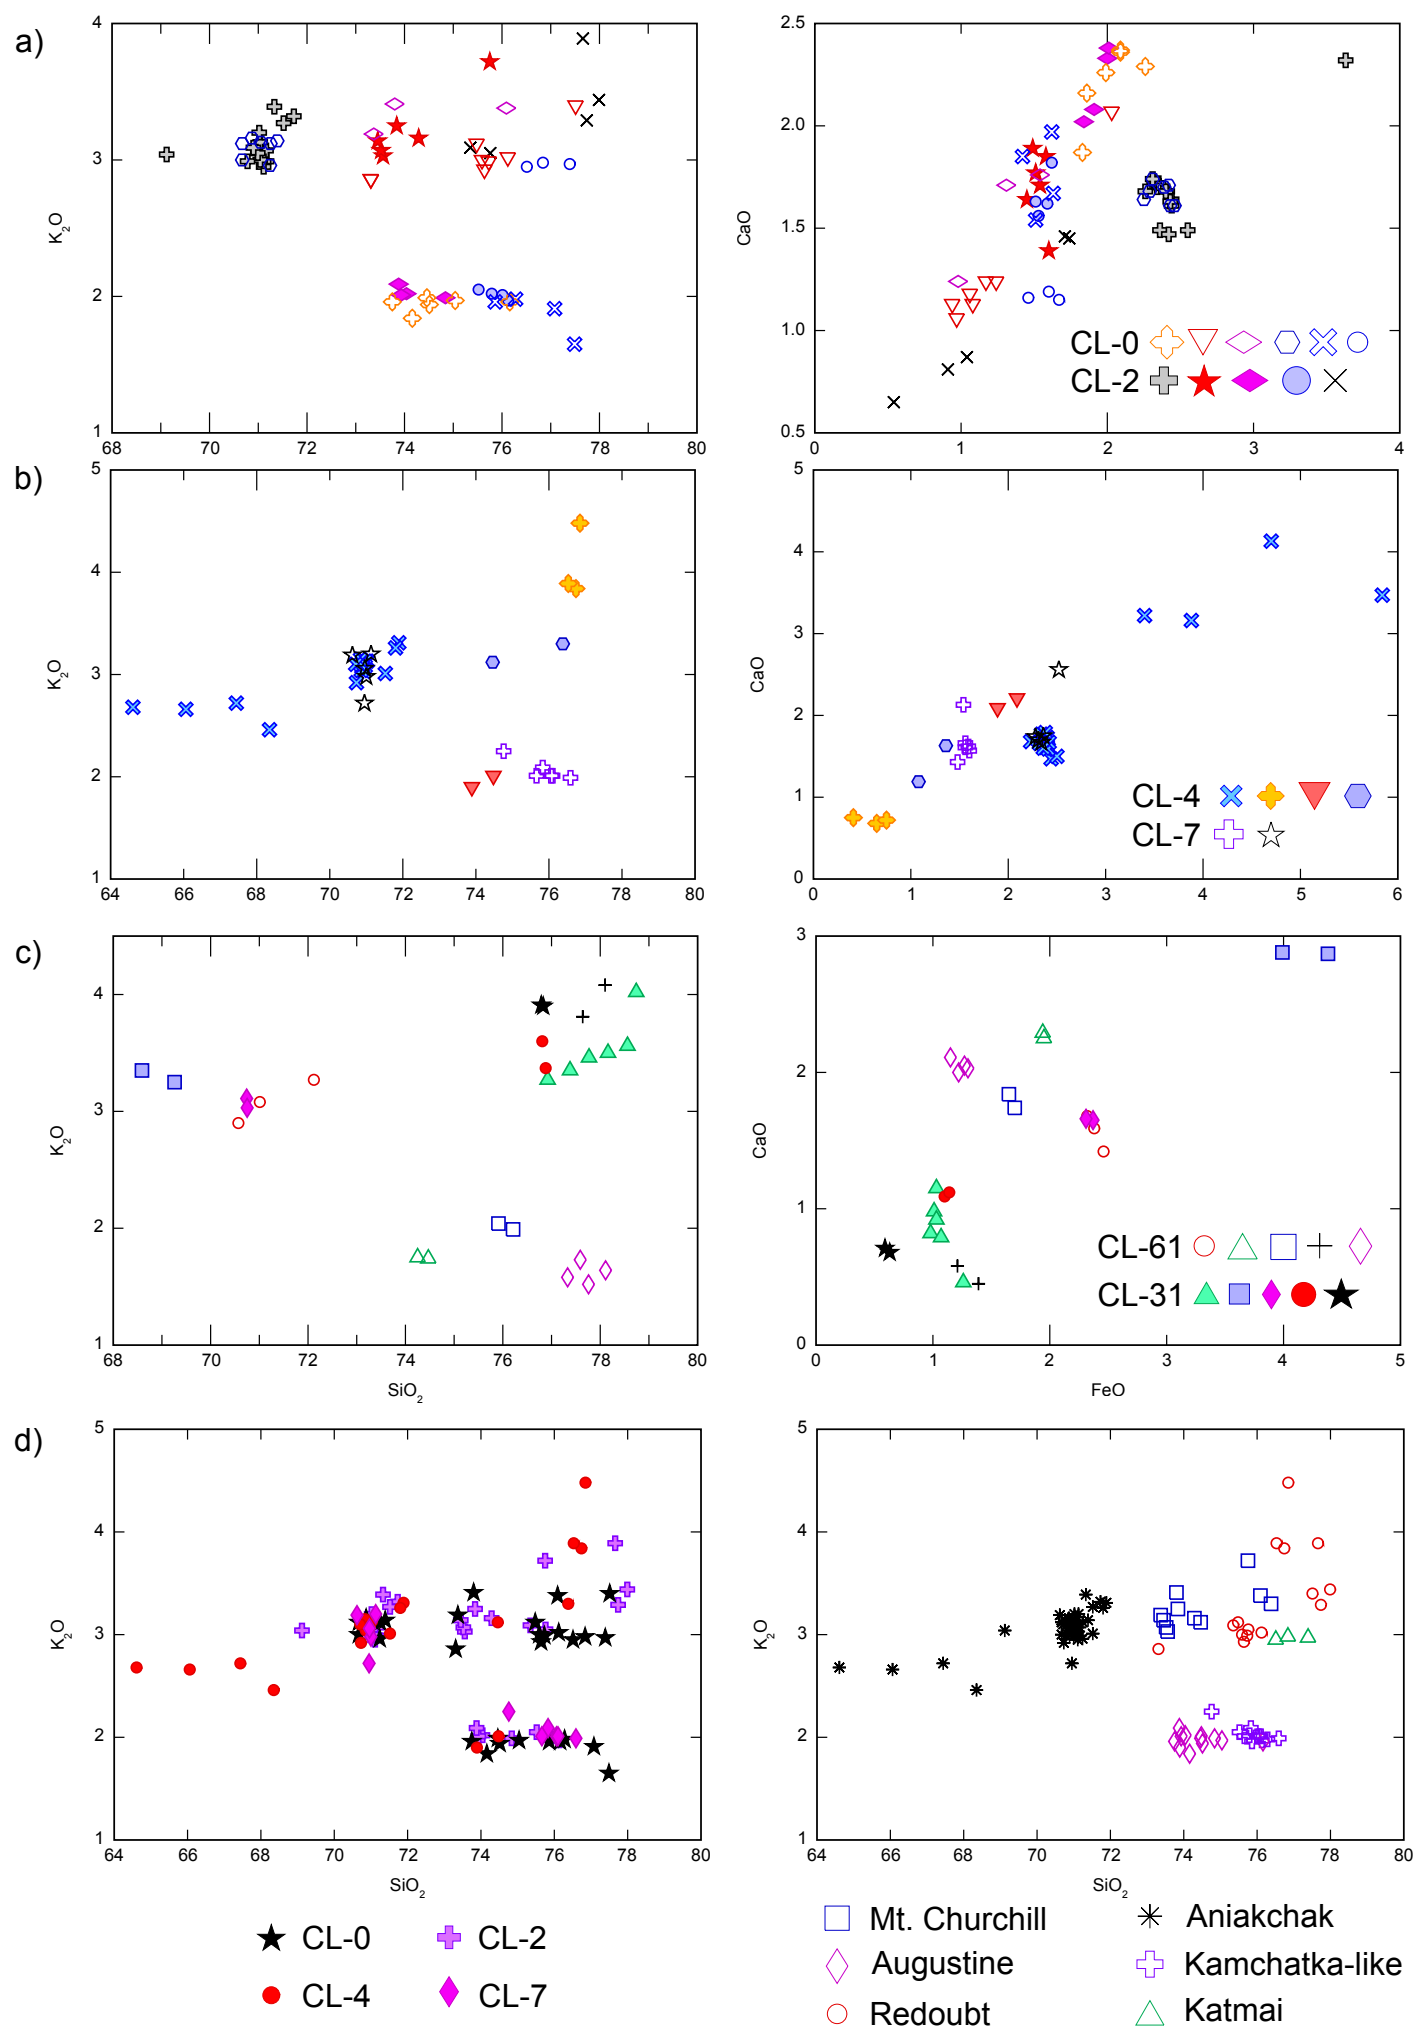

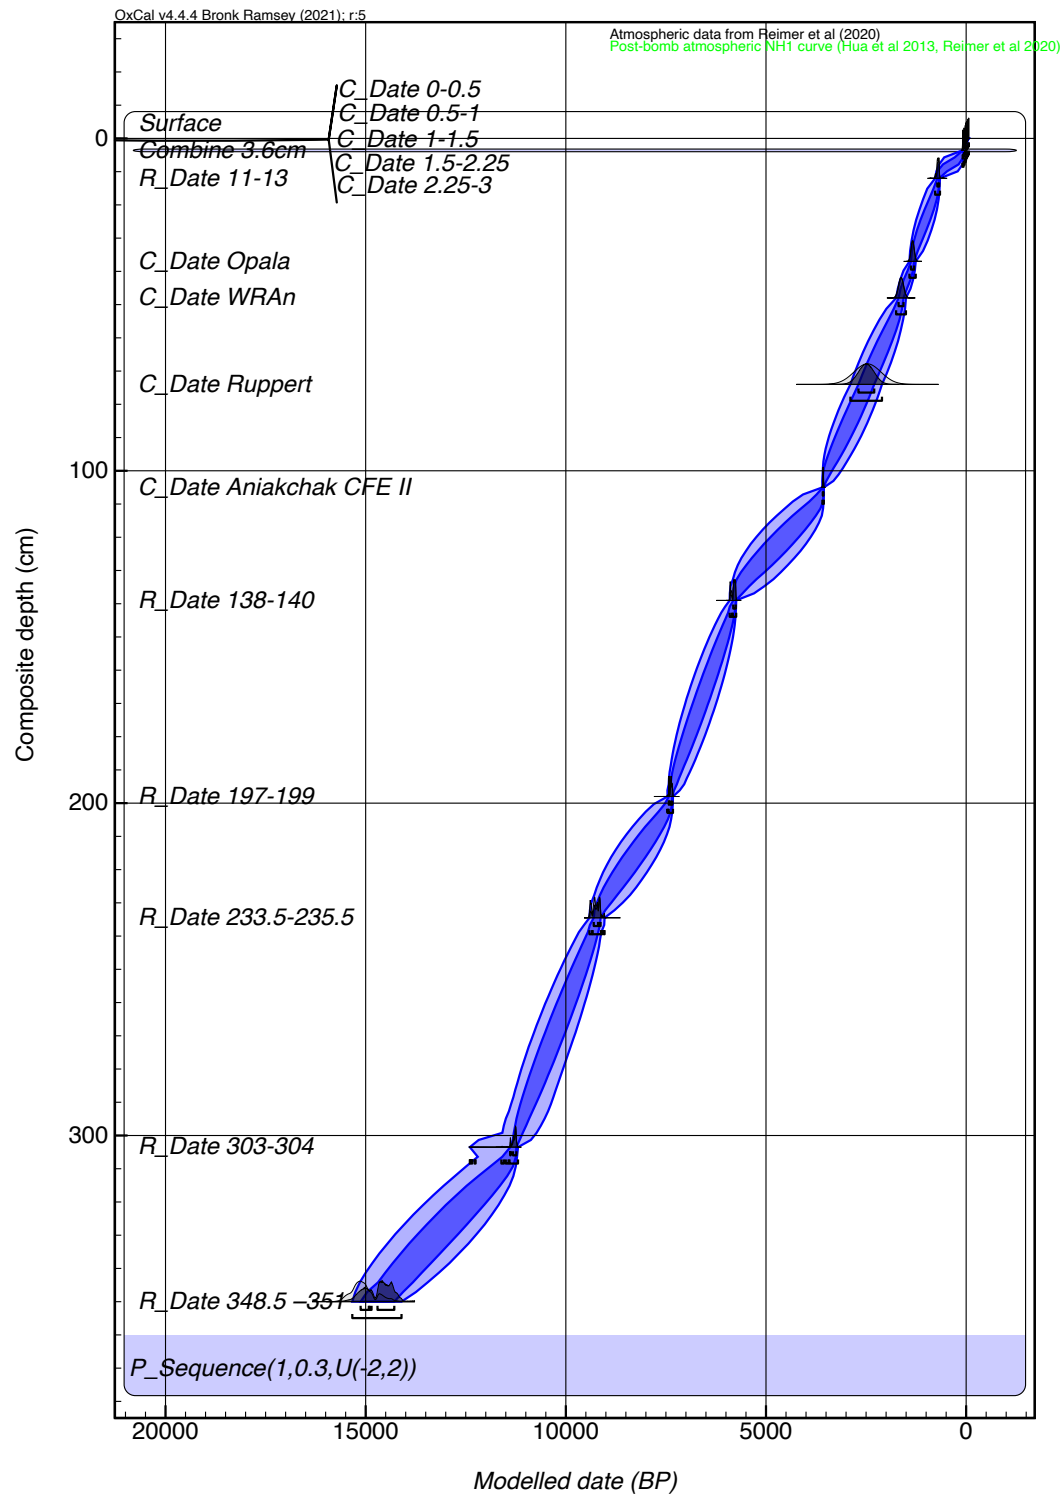

**Figure S6:** OxCal age-depth output for the final Bayesian model for Cascade Lake.

The students'-t outlier analysis results shown good agreement.

Posterior = likelihood of being an outlier  
(original assumption is 5, or 1 in 20 chance)

| Element          | Ok                     | Outlier                | Prior | Posterior | Model   | Type |
|------------------|------------------------|------------------------|-------|-----------|---------|------|
| 348.5 – 351      | <div><div></div></div> | <div><div></div></div> | 5     | 6         | General | t    |
| 303-304          | <div><div></div></div> | <div><div></div></div> | 5     | 9         | General | t    |
| 233.5-235.5      | <div><div></div></div> | <div><div></div></div> | 5     | 4         | General | t    |
| 197-199          | <div><div></div></div> | <div><div></div></div> | 5     | 4         | General | t    |
| 138-140          | <div><div></div></div> | <div><div></div></div> | 5     | 4         | General | t    |
| Aniakchak CFE II | <div><div></div></div> | <div><div></div></div> | 5     | 3         | General | t    |
| Ruppert          | <div><div></div></div> | <div><div></div></div> | 5     | 4         | General | t    |
| WRAn             | <div><div></div></div> | <div><div></div></div> | 5     | 4         | General | t    |
| Opala            | <div><div></div></div> | <div><div></div></div> | 5     | 3         | General | t    |
| 11-13            | <div><div></div></div> | <div><div></div></div> | 5     | 4         | General | t    |
| 3-3.6            | <div><div></div></div> | <div><div></div></div> | 5     | 3         | General | t    |
| 2.25-3           | <div><div></div></div> | <div><div></div></div> | 5     | 3         | General | t    |
| 1.5-2.25         | <div><div></div></div> | <div><div></div></div> | 5     | 4         | General | t    |
| 1-1.5            | <div><div></div></div> | <div><div></div></div> | 5     | 4         | General | t    |
| 0.5-1            | <div><div></div></div> | <div><div></div></div> | 5     | 3         | General | t    |
| 0-0.5            | <div><div></div></div> | <div><div></div></div> | 5     | 2         | General | t    |
| Surface          | <div><div></div></div> | <div><div></div></div> | 5     | 2         | General | t    |
