# Supplementary material for: Late Holocene cryptotephra and a provisional 15 000-year Bayesian age model for Cascade Lake, Alaska
Source: Copernicus journal article supplement (doi:10.5194/gchron-4-121-2022), 2022-03-11
Supplement: Supplementary file 1 [file gchron-4-121-2022-supplement.zip › SI_tables.xlsx]

## Sheet: Index
Table S1: Grain size measurements for unimodal tephra samples reported at Cascade Lake. Measurements were made using optical microscopy (Grain depth) and image analysis with ImageJ software. Geometric size (here, dv – diameter of a volume equivalent sphere) and sphericity (ψ) were calculated following the methods reported in Saxby et al. (2020).
Table S2: Single point major element glass geochemical data for Cascade Lake samples and reference material.
Table S3: Secondary standard data (ID 3506 and Old Crow) for EPMA glass analyses of Cascade Lake samples and reference material.
Table S4: Unnormalised EPMA data (secondary standards and Cascade Lake samples).
Table S5: Ages for tephras reviewed within this study, listed by associated tephra.
Table S6: OxCal age model output for the initial multi-method chronometer comparison. Age models based on a) radiometric ages and b) correlated tephra ages.
Table S7: Final OxCal age model output for 0-3.51 m of CASC13-4A/2D, Cascade Lake.

## Sheet: Table S1
Table S1: Grain size measurements for unimodal tephra samples reported at Cascade Lake. Measurements were made using optical microscopy (Grain depth, D) and image analysis with ImageJ software.
Geometric size (here, dv – diameter of a volume equivalent sphere) and sphericity (ψ) were calculated following the methods reported in Saxby et al. (2020).
	Maximum projected area (Amax)		Perimeter (P)		Maximum axis length (L)		Short axis length (W)		Grain depth (D)		Volume (AmaxD)		Surface Area (2Amax + PD)		Diameter of a volume-equivalent sphere in mm (dv)		Sphericity (ψ)
	mm^2	μm^2	mm	μm	mm	μm	mm	μm	mm	μm	mm^3	μm^3	mm^2	μm^2	mm	μm
CL 37 - Opala
1	0.0003	300	0.0744	74.4	0.0239	23.9	0.0149	14.9	0.114	114	3.42e-05	34200	0.0090816	9081.6	0.0402794	40.2794	0.560961
2	0.0003	300	0.0789	78.9	0.0262	26.2	0.0148	14.8	0.078	78	2.34e-05	23400	0.0067542	6754.2	0.0354933	35.4933	0.585662
3	0.0003	300	0.0798	79.8	0.0227	22.7	0.0162	16.2	0.09	90	2.7e-05	27000	0.007782	7782	0.0372273	37.2273	0.559193
4	0.0003	300	0.0795	79.5	0.0236	23.6	0.0168	16.8	0.087	87	2.61e-05	26100	0.0075165	7516.5	0.036809	36.809	0.566007
5	0.0002	200	0.0717	71.7	0.023	23	0.0116	11.6	0.069	69	1.38e-05	13800	0.0053473	5347.3	0.0297646	29.7646	0.52023
6	0.0004	400	0.0883	88.3	0.0282	28.2	0.0191	19.1	0.081	81	3.24e-05	32400	0.0079523	7952.3	0.0395599	39.5599	0.617942
7	0.0002	200	0.0619	61.9	0.0189	18.9	0.0159	15.9	0.078	78	1.56e-05	15600	0.0052282	5228.2	0.0310062	31.0062	0.577398
8	0.0003	300	0.0664	66.4	0.0238	23.8	0.0136	13.6	0.078	78	2.34e-05	23400	0.0057792	5779.2	0.0354933	35.4933	0.684469
9	0.0004	400	0.0842	84.2	0.027	27	0.021	21	0.06	60	2.4e-05	24000	0.005852	5852	0.0357941	35.7941	0.68746
10	0.0002	200	0.0597	59.7	0.0184	18.4	0.012	12	0.063	63	1.26e-05	12600	0.0041611	4161.1	0.0288756	28.8756	0.629192
Minimum	0.0002	200	0.0597	59.7	0.0184	18.4	0.0116	11.6	0.06	60	1.26e-05	12600	0.0041611	4161.1	0.0288756	28.8756	0.52023
Maximum	0.0004	400	0.0883	88.3	0.0282	28.2	0.021	21	0.114	114	3.42e-05	34200	0.0090816	9081.6	0.0402794	40.2794	0.68746
Mean	0.00029	290	0.07448	74.48	0.02357	23.57	0.01559	15.59	0.0798	79.8	2.325e-05	23250	0.00654544	6545.44	0.0350303	35.0303	0.598851
CL 48 - WRAn
1	0.0002	200	0.0706	70.6	0.0213	21.3	0.0146	14.6	0.075	75	1.5e-05	15000	0.005695	5695	0.0306035	30.6035	0.51639
2	0.0001	100	0.0472	47.2	0.0151	15.1	0.0123	12.3	0.084	84	8.4e-06	8400	0.0041648	4164.8	0.0252251	25.2251	0.479736
3	0.0005	500	0.115	115	0.0311	31.1	0.0191	19.1	0.087	87	4.35e-05	43500	0.011005	11005	0.0436419	43.6419	0.543434
4	0.0004	400	0.0777	77.7	0.0242	24.2	0.0195	19.5	0.096	96	3.84e-05	38400	0.0082592	8259.2	0.041865	41.865	0.666336
5	0.0002	200	0.0667	66.7	0.0217	21.7	0.0141	14.1	0.081	81	1.62e-05	16200	0.0058027	5802.7	0.0313987	31.3987	0.533487
6	0.0003	300	0.0683	68.3	0.0219	21.9	0.0175	17.5	0.108	108	3.24e-05	32400	0.0079764	7976.4	0.0395599	39.5599	0.616075
7	0.0003	300	0.0746	74.6	0.021	21	0.0173	17.3	0.081	81	2.43e-05	24300	0.0066426	6642.6	0.0359426	35.9426	0.610675
8	0.0004	400	0.0869	86.9	0.0304	30.4	0.0176	17.6	0.102	102	4.08e-05	40800	0.0096638	9663.8	0.0427196	42.7196	0.592975
9	0.0003	300	0.0718	71.8	0.0247	24.7	0.0155	15.5	0.108	108	3.24e-05	32400	0.0083544	8354.4	0.0395599	39.5599	0.588201
10	0.0004	400	0.0841	84.1	0.0266	26.6	0.0185	18.5	0.099	99	3.96e-05	39600	0.0091259	9125.9	0.0422966	42.2966	0.615553
11	0.0003	300	0.0681	68.1	0.0219	21.9	0.0169	16.9	0.117	117	3.51e-05	35100	0.0085677	8567.7	0.0406296	40.6296	0.604994
12	0.0002	200	0.0688	68.8	0.0165	16.5	0.0139	13.9	0.057	57	1.14e-05	11400	0.0043216	4321.6	0.0279281	27.9281	0.566721
13	0.0002	200	0.0696	69.6	0.0203	20.3	0.0144	14.4	0.075	75	1.5e-05	15000	0.00562	5620	0.0306035	30.6035	0.523281
14	0.0006	600	0.1015	101.5	0.0298	29.8	0.0257	25.7	0.06	60	3.6e-05	36000	0.00729	7290	0.040974	40.974	0.723133
Minimum	0.0001	100	0.0472	47.2	0.0151	15.1	0.0123	12.3	0.057	57	8.4e-06	8400	0.0041648	4164.8	0.0252251	25.2251	0.479736
Maximum	0.0006	600	0.115	115	0.0311	31.1	0.0257	25.7	0.117	117	4.35e-05	43500	0.011005	11005	0.0436419	43.6419	0.723133
Mean	0.000314286	314.286	0.0764929	76.4929	0.0233214	23.3214	0.0169214	16.9214	0.0878571	87.8571	2.775e-05	27750	0.00732065	7320.65	0.0366392	36.6392	0.584357
CL 74 - Ruppert
1	0.0003	300	0.0636	63.6	0.0198	19.8	0.018	18	0.09	90	2.7e-05	27000	0.006324	6324	0.0372273	37.2273	0.688116
2	0.0004	400	0.0813	81.3	0.0251	25.1	0.0224	22.4	0.09	90	3.6e-05	36000	0.008117	8117	0.040974	40.974	0.649457
3	0.0003	300	0.0682	68.2	0.0199	19.9	0.0171	17.1	0.09	90	2.7e-05	27000	0.006738	6738	0.0372273	37.2273	0.645836
4	0.0005	500	0.0888	88.8	0.0318	31.8	0.0219	21.9	0.069	69	3.45e-05	34500	0.0071272	7127.2	0.0403968	40.3968	0.71896
5	0.0003	300	0.0764	76.4	0.0238	23.8	0.014	14	0.081	81	2.43e-05	24300	0.0067884	6788.4	0.0359426	35.9426	0.597559
6	0.0002	200	0.0723	72.3	0.0186	18.6	0.0163	16.3	0.072	72	1.44e-05	14400	0.0056056	5605.6	0.0301899	30.1899	0.510541
7	0.0002	200	0.072	72	0.0235	23.5	0.0133	13.3	0.075	75	1.5e-05	15000	0.0058	5800	0.0306035	30.6035	0.507042
Minimum	0.0001	200	0.0636	63.6	0.0186	18.6	0.0133	13.3	0.069	69	1.44e-05	14400	0.0056056	5605.6	0.0301899	30.1899	0.507042
Maximum	0.0006	500	0.0888	88.8	0.0318	31.8	0.0224	22.4	0.09	90	3.6e-05	36000	0.008117	8117	0.040974	40.974	0.71896
Mean	0.000321429	314.286	0.0746571	74.6571	0.0232143	23.2143	0.0175714	17.5714	0.081	81	2.54571e-05	25457.1	0.00664289	6642.89	0.0360802	36.0802	0.616787
CL 96 - UNK
1	0.0003	300	0.0723	72.3	0.0252	25.2	0.0169	16.9	0.069	69	2.07e-05	20700	0.0055887	5588.7	0.034072	34.072	0.652249
2	0.0001	100	0.0528	52.8	0.0152	15.2	0.0122	12.2	0.096	96	9.6e-06	9600	0.0052688	5268.8	0.0263733	26.3733	0.414521
3	0.0003	300	0.0787	78.7	0.0222	22.2	0.0183	18.3	0.093	93	2.79e-05	27900	0.0079191	7919.1	0.0376364	37.6364	0.561657
4	0.0003	300	0.0758	75.8	0.0242	24.2	0.0159	15.9	0.102	102	3.06e-05	30600	0.0083316	8331.6	0.0388133	38.8133	0.567758
5	0.0002	200	0.0641	64.1	0.0202	20.2	0.0144	14.4	0.084	84	1.68e-05	16800	0.0057844	5784.4	0.0317817	31.7817	0.548309
6	0.0004	400	0.083	83	0.0306	30.6	0.0178	17.8	0.099	99	3.96e-05	39600	0.009017	9017	0.0422966	42.2966	0.622987
7	0.0003	300	0.075	75	0.0258	25.8	0.0171	17.1	0.105	105	3.15e-05	31500	0.008475	8475	0.0391902	39.1902	0.569043
Minimum	0.0001	100	0.0528	52.8	0.0152	15.2	0.0122	12.2	0.069	69	9.6e-06	9600	0.0052688	5268.8	0.0263733	26.3733	0.414521
Maximum	0.0006	400	0.083	83	0.0306	30.6	0.0183	18.3	0.105	105	3.96e-05	39600	0.009017	9017	0.0422966	42.2966	0.652249
Mean	0.000292143	271.429	0.0716714	71.6714	0.0233429	23.3429	0.0160857	16.0857	0.0925714	92.5714	2.52429e-05	25242.9	0.0071978	7197.8	0.0357376	35.7376	0.56236
CL 105 - Aniackchak CFE II
1	0.0004	400	0.0736	73.6	0.0258	25.8	0.0173	17.3	0.084	84	3.36e-05	33600	0.0069824	6982.4	0.0400424	40.0424	0.72105
2	0.0003	300	0.0719	71.9	0.0221	22.1	0.0156	15.6	0.06	60	1.8e-05	18000	0.004914	4914	0.0325211	32.5211	0.675809
3	0.0004	400	0.0862	86.2	0.0239	23.9	0.0188	18.8	0.081	81	3.24e-05	32400	0.0077822	7782.2	0.0395599	39.5599	0.631449
4	0.0003	300	0.0698	69.8	0.0211	21.1	0.0159	15.9	0.084	84	2.52e-05	25200	0.0064632	6463.2	0.036381	36.381	0.643028
5	0.0006	600	0.1161	116.1	0.0407	40.7	0.0188	18.8	0.09	90	5.4e-05	54000	0.011649	11649	0.0469035	46.9035	0.592995
6	0.0004	400	0.0747	74.7	0.0225	22.5	0.0202	20.2	0.066	66	2.64e-05	26400	0.0057302	5730.2	0.0369495	36.9495	0.74813
7	0.0005	500	0.0921	92.1	0.0267	26.7	0.0237	23.7	0.078	78	3.9e-05	39000	0.0081838	8183.8	0.0420819	42.0819	0.679462
8	0.0002	200	0.0589	58.9	0.0185	18.5	0.0142	14.2	0.069	69	1.38e-05	13800	0.0044641	4464.1	0.0297646	29.7646	0.623155
9	0.0005	500	0.0967	96.7	0.0303	30.3	0.0195	19.5	0.087	87	4.35e-05	43500	0.0094129	9412.9	0.0436419	43.6419	0.635351
10	0.0006	600	0.1112	111.2	0.0379	37.9	0.0194	19.4	0.099	99	5.94e-05	59400	0.0122088	12208.8	0.0484175	48.4175	0.602923
11	0.0006	600	0.108	108	0.0381	38.1	0.0184	18.4	0.078	78	4.68e-05	46800	0.009624	9624	0.0447187	44.7187	0.652458
12	0.0002	200	0.0634	63.4	0.0213	21.3	0.0126	12.6	0.066	66	1.32e-05	13200	0.0045844	4584.4	0.0293268	29.3268	0.589084
13	0.0002	200	0.0759	75.9	0.026	26	0.0121	12.1	0.078	78	1.56e-05	15600	0.0063202	6320.2	0.0310062	31.0062	0.477635
14	0.0003	300	0.077	77	0.0262	26.2	0.0169	16.9	0.081	81	2.43e-05	24300	0.006837	6837	0.0359426	35.9426	0.593311
15	0.0003	300	0.0824	82.4	0.0245	24.5	0.0171	17.1	0.081	81	2.43e-05	24300	0.0072744	7274.4	0.0359426	35.9426	0.557636
Minimum	0.0002	200	0.0589	58.9	0.0185	18.5	0.0121	12.1	0.06	60	1.32e-05	13200	0.0044641	4464.1	0.0293268	29.3268	0.477635
Maximum	0.0006	600	0.1161	116.1	0.0407	40.7	0.0237	23.7	0.099	99	5.94e-05	59400	0.0122088	12208.8	0.0484175	48.4175	0.74813
Mean	0.000386667	386.667	0.08386	83.86	0.02704	27.04	0.0173667	17.3667	0.0788	78.8	3.13e-05	31300	0.00749537	7495.37	0.0382133	38.2133	0.628232

## Sheet: Table S2
Table S2: Single point major element glass geochemical data for Cascade Lake samples and reference material.
Data are listed here by sample/depth from seven analytical days in 2018 and one in 2019. Only one sample (CL-48) was analysed on multiple days.
Population identifiers (popn) are listed for any Cascade Lake sample where there are multiple geochemical groups with at least 3 analyses.
Analyses of reference material for given eruptions are included here below relevant/correlated CL samples. It is noted if these were analysed concurrently (not always possible given small glass populations of some samples).
Reasons for rejection of analyses are listed - these are most commonly low analytical totals (<94%), non-glass silicate and mineral inclusion or contamination (i.e. glass with some mineral input, or mostly mineral analysed).
Analyses highlighted in red text have analytical totals between 94-96%; reject analyses highlighted in red show elemental values used to identify them as anomalous.
Analytical conditions: 5 micron beam (exception: Nov 16th, 10 micron beam), 15 KeV and 6 nA current
Data normalised to 100%. St. Dev. = standard deviation.																			Rejected analyses
Sample #	Popn	Run #	UA #	SiO2	TiO2	Al2O3	FeOt	MnO	MgO	CaO	Na2O	K2O	Cl	Total	H2Od	n	Comments		Run #	SAMPLE	SiO2	TiO2	Al2O3	FeOt	MnO	MgO	CaO	Na2O	K2O	Cl	Total	H2Od	Comments
CL-0	a	Oct 11 2018	Casc13-12-27	71.0501	0.454677	14.8412	2.24539	0.160021	0.485128	1.63657	5.84054	3.1291	0.203035	100	0.7091				Oct 11 2018	Casc13-12-14	59.9696	1.27968	15.465	8.52195	0.20926	2.69119	5.56199	3.61135	2.44014	0.322571	100	12.5769	Low analytical total
	a	Oct 11 2018	Casc13-12-35	71.2464	0.497688	15.1149	2.29227	0.138693	0.467642	1.68061	5.28059	3.12201	0.205647	100	1.7157				Oct 11 2018	Casc13-12-32	75.4769	0.242681	13.7146	1.21397	0.00561088	0.310964	1.25677	4.59989	2.99834	0.232681	100	15.8956	Low analytical total
	a	Oct 11 2018	Casc13-12-25	70.673	0.518093	14.8977	2.31253	0.199249	0.525135	1.73848	5.82478	3.12378	0.241726	100	3.4673				Oct 11 2018	Casc13-12-13	68.4232	0.676552	12.9248	5.658	0.271729	2.62803	4.38896	2.72875	1.30933	1.2793	100	43.9512	Low analytical total
	a	Oct 11 2018	Casc13-12-21	71.2351	0.464815	14.9955	2.39433	0.137037	0.498995	1.69846	5.4193	2.9593	0.254665	100	0.9021				Oct 11 2018	Casc13-12-15	75.5894	0.254036	13.6491	1.16972	0.0198306	0.300037	1.23879	4.61817	3.00337	0.203378	100	7.8191	Low analytical total
	a	Oct 11 2018	Casc13-12-37	70.6686	0.458826	14.963	2.41647	0.140315	0.516315	1.70513	5.97143	3.00369	0.20143	100	-0.393
	a	Oct 11 2018	Casc13-12-28	70.8663	0.518523	14.8513	2.43362	0.167589	0.490314	1.6114	5.69731	3.15729	0.266563	100	2.4765
	a	Oct 11 2018	Casc13-12-26	71.3863	0.444819	14.6417	2.45698	0.201436	0.489341	1.60654	5.46194	3.14262	0.21733	100	1.3255
			Mean	71.018	0.479634	14.9008	2.36451	0.163477	0.496124	1.66817	5.64227	3.09111	0.2272	100	1.4576	7	Aniakchak like
			St. Dev.	0.288702	0.0311044	0.148231	0.0806486	0.0276863	0.0194484	0.0506637	0.257244	0.0769375	0.0268478	0	1.2553
	b	Oct 11 2018	Casc13-12-1	76.0902	0.114375	13.112	0.975144	0.0342575	0.189051	1.23728	4.59692	3.38455	0.343809	100	2.5791
	b	Oct 11 2018	Casc13-12-22	73.367	0.174254	14.4625	1.53918	0.0663235	0.41157	1.76315	4.77548	3.19333	0.319331	100	1.8659
	b	Oct 11 2018	Casc13-12-6	73.8005	0.191013	14.387	1.31229	0.0638203	0.357683	1.70675	4.52544	3.40647	0.321674	100	4.9065
			Mean	74.4192	0.159881	13.9871	1.27554	0.0548005	0.319435	1.56906	4.63261	3.32812	0.328272	100	3.11717	3	Churchill like
			St. Dev.	1.46328	0.0402903	0.758858	0.283808	0.0178347	0.116086	0.28871	0.128782	0.117239	0.0135069	0	1.59011
	c	Oct 11 2018	Casc13-12-19	75.0393	0.307657	13.7524	1.83235	0.0742578	0.411883	1.86862	4.63299	1.97061	0.142145	100	1.609
	c	Oct 11 2018	Casc13-12-10	74.4582	0.265751	13.7397	1.86125	0.0942105	0.425505	2.16027	4.79301	1.99183	0.271547	100	1.3242
	c	Oct 11 2018	Casc13-12-4	74.5131	0.317777	13.9879	1.98506	0.0793303	0.50059	2.26138	4.26104	1.93957	0.199246	100	2.8265
	c	Oct 11 2018	Casc13-12-17	73.7472	0.285783	14.1289	2.08657	0.112599	0.501685	2.35795	4.67145	1.96082	0.189989	100	1.4571
	c	Oct 11 2018	Casc13-12-18	74.1585	0.332506	14.1357	2.0911	0.0660842	0.461949	2.36798	4.32514	1.84109	0.284168	100	2.2142
	c	Oct 11 2018	Casc13-12-31	76.159	0.383227	12.3554	2.2588	0.0901685	0.486105	2.28691	3.8788	1.96343	0.178378	100	1.2482
			Mean	74.6792	0.31545	13.6833	2.01919	0.0861083	0.46462	2.21718	4.42707	1.94456	0.210912	100	1.77987	6	Augustine like
			St. Dev.	0.840921	0.0407454	0.673376	0.160091	0.0165603	0.0385942	0.186605	0.338998	0.0534131	0.0555054	0	0.617699
	d	Oct 11 2018	Casc13-12-36	73.3112	0.41406	14.0952	2.03285	0.0715639	0.51835	2.07304	4.47511	2.86118	0.190492	100	0.9892
	d	Oct 11 2018	Casc13-12-20	75.4835	0.301181	13.5605	1.07847	0.0455711	0.271666	1.13432	4.90981	3.12201	0.120142	100	2.8177
	d	Oct 11 2018	Casc13-12-33	75.6392	0.214174	13.7407	1.05836	0.0358289	0.291506	1.1782	4.83411	2.9285	0.10253	100	1.7917
	d	Oct 11 2018	Casc13-12-38	75.7346	0.270635	13.51	1.23693	0.0400243	0.316742	1.23746	4.56251	2.99315	0.12641	100	3.626
	d	Oct 11 2018	Casc13-12-12	76.1224	0.251475	13.3665	0.939241	0.0442585	0.266379	1.12735	4.78366	3.02259	0.0983279	100	1.4878
	d	Oct 11 2018	Casc13-12-29	77.5065	0.109166	12.777	0.973068	0.0352741	0.221915	1.06343	3.70066	3.39548	0.280775	100	3.2065
			Mean	75.6329	0.260115	13.5083	1.21982	0.0454201	0.314426	1.3023	4.54431	3.05382	0.153113	100	2.31982	6	Similar to Shiveluch, Redoubt
			St. Dev.	1.35449	0.100466	0.437297	0.411575	0.0134827	0.1047	0.381974	0.445361	0.189129	0.0707884	0	1.04708
	-	Oct 11 2018	Casc13-12-11	75.8645	0.183037	13.1581	1.63398	0.0405216	0.284051	1.6665	5.07525	1.96021	0.172959	100	1.7067
	-	Oct 11 2018	Casc13-12-9	76.2842	0.258311	13.2974	1.50653	0.0489673	0.282512	1.54144	4.66946	1.98486	0.163168	100	1.8795
			Mean	76.0743	0.220674	13.2277	1.57025	0.0447445	0.283281	1.60397	4.87236	1.97254	0.168063	100	1.7931	2
			St. Dev.	0.29676	0.0532268	0.0985398	0.0901221	0.00597205	0.0010883	0.0884313	0.286935	0.0174234	0.00692339	0	0.122188
	e	Oct 11 2018	Casc13-12-23	76.507	0.347561	12.2063	1.66624	0.0332405	0.285888	1.1501	4.70148	2.95161	0.194486	100	2.0503
	e	Oct 11 2018	Casc13-12-24	76.8418	0.356673	12.3713	1.6024	0.0376856	0.239509	1.18696	4.22066	2.98115	0.209087	100	1.108
	e	Oct 11 2018	Casc13-12-5	77.3889	0.291641	12.2317	1.45571	0.0200355	0.258491	1.15601	4.05777	2.96779	0.222199	100	1.6847
			Mean	76.9126	0.331958	12.2697	1.57479	0.0303205	0.261296	1.16436	4.32664	2.96685	0.208591	100	1.61433	3	Katmai like
			St. Dev.	0.445161	0.0352117	0.0888474	0.107947	0.00918017	0.0233163	0.0197985	0.334686	0.0147946	0.0138636	0	0.475075
	-	Oct 11 2018	Casc13-12-30	77.8513	0.0549927	12.0153	1.12662	0.0739942	0.0324141	0.420292	3.48358	4.87877	0.0810171	100	3.829
	-	Oct 11 2018	Casc13-12-2	77.0821	0.319345	12.4515	1.61772	0.0664583	0.391245	1.96662	3.94695	1.91429	0.314795	100	3.5545
	-	Oct 11 2018	Casc13-12-39	77.4906	0.234814	12.3546	1.41737	0.0723621	0.335179	1.8539	4.42712	1.65316	0.207625	100	1.852
	-	Oct 11 2018	Casc13-12-34	76.622	0.129371	13.0874	0.64356	0.107363	0.110105	0.719033	4.65667	3.81416	0.142478	100	1.5767
	-	Oct 11 2018	Casc13-12-7	74.5501	0.164367	13.6124	1.21897	0.0427166	0.275547	1.30942	3.52357	5.07195	0.298226	100	1.2726
	-	Oct 11 2018	Casc13-12-16	72.0821	0.333616	14.8823	2.27326	0.0776184	0.632186	2.34778	5.21663	2.07766	0.0991908	100	2.6442
	-	Oct 11 2018	Casc13-12-3	77.5805	0.1877	12.658	1.06518	0.058145	0.316394	1.26162	4.02339	2.71293	0.175731	100	3.0922
	-	Oct 11 2018	Casc13-12-8	78.2434	0.279966	11.5605	1.43646	0.05979	0.171452	0.747161	3.99769	3.36236	0.182369	100	5.1179
REF	-	Oct 11 2018	UA 1364-13	75.9749	0.353698	12.6526	1.55195	0.0459817	0.281427	1.37084	4.59729	3.03092	0.180708	100	-0.777		Kodiak Island, station 07JANV-2
Novarupta-Katmai 1912	-	Oct 11 2018	UA 1364-7	76.3833	0.364178	12.1446	1.76436	0.026552	0.313454	1.21247	4.66585	2.96976	0.200733	100	4.0601		Davies et al. (2016)
	-	Oct 11 2018	UA 1364-5	76.664	0.273179	12.7326	1.3292	0.0696407	0.214078	1.27339	4.35953	2.94367	0.181337	100	-0.177
	-	Oct 11 2018	UA 1364-14	76.7972	0.371268	12.4738	1.66787	0.0578744	0.281411	1.28157	3.84887	3.06058	0.206164	100	0.7126		Analysed concurrently with unknown sample
	-	Oct 11 2018	UA 1364-9	77.0141	0.355189	12.3461	1.66692	0.0355001	0.256263	1.20328	3.99774	2.98777	0.176989	100	0.2087
	-	Oct 11 2018	UA 1364-1	77.2648	0.364779	12.0663	1.65435	0.0309204	0.24526	1.16233	3.99543	3.04871	0.215979	100	0.5543
	-	Oct 11 2018	UA 1364-10	77.5994	0.180616	11.9685	1.25125	0.0954758	0.0846155	0.71601	4.717	3.21362	0.224146	100	3.4562
	-	Oct 11 2018	UA 1364-15	77.6172	0.199468	12.1583	1.24689	0.0448454	0.152408	0.806006	4.37904	3.24395	0.196204	100	0.2663
	-	Oct 11 2018	UA 1364-11	77.6244	0.326963	12.4711	1.28942	0.0398662	0.220613	1.17352	3.5922	3.09878	0.210462	100	-0.268
	-	Oct 11 2018	UA 1364-12	77.7961	0.248825	12.0659	1.27623	0.0485285	0.177041	1.00289	4.00203	3.23205	0.194307	100	0.5595
	-	Oct 11 2018	UA 1364-2	78.193	0.129101	12.1112	1.20439	0.0187214	0.114688	0.704815	4.26547	3.07913	0.232056	100	-0.452
	-	Oct 11 2018	UA 1364-6	78.3042	0.164551	12.1125	1.10367	0	0.118264	0.68559	4.24093	3.08772	0.235637	100	-0.291
			Mean	77.2694	0.277651	12.2753	1.41721	0.0428256	0.20496	1.04939	4.22178	3.08305	0.20456	100	0.654392	12
			St. Dev.	0.718122	0.0901045	0.252281	0.226474	0.0245841	0.074916	0.253964	0.345698	0.100529	0.019843	0	1.52344
	-	Oct 11 2018	UA 1364-8	68.8221	0.687564	14.9213	3.7076	0.0997912	1.10395	3.65319	4.47449	2.40932	0.155907	100	0.0563
	-	Oct 11 2018	UA 1364-4	69.2513	0.720628	14.8346	4.02451	0.102334	1.02493	3.3668	4.09757	2.44755	0.167444	100	1.2292
	-	Oct 11 2018	UA 1364-3	69.6673	0.604322	14.5252	3.65853	0.072237	1.03801	3.15864	4.67444	2.47877	0.158324	100	0.3876
			Mean	69.2469	0.670838	14.7604	3.79688	0.091454	1.05563	3.39288	4.4155	2.44521	0.160558	100	0.5577	3
			St. Dev.	0.422609	0.0599297	0.208232	0.198654	0.0166909	0.0423551	0.248301	0.292925	0.0347845	0.00608466	0	0.604669
REF	-	Oct 11 2018	UA 2754-15	76.018	0.277472	13.1725	1.35014	0.0738389	0.244625	1.40075	3.95632	3.39911	0.138459	100	0.3561		Seismic station RDN, Alaska		Oct 11 2018	UA 2754-1	54.1715	0.0232181	28.6037	0.603193	0.0300057	0.0665653	11.5165	4.74236	0.229899	0.0170473	100	1.5853	Mineral contamination
Redoubt 1989-90	-	Oct 11 2018	UA 2754-9	76.7942	0.294179	12.7723	1.02867	0.0370316	0.0839117	1.1509	4.40012	3.35919	0.102719	100	0.2177		Davies et al. (2016)		Oct 11 2018	UA 2754-2	47.347	1.8862	8.52529	13.4223	0.516954	14.6203	11.102	2.02238	0.4712	0.11152	100	2.7544	Mineral contamination
	-	Oct 11 2018	UA 2754-13	77.2379	0.308592	12.7194	1.10255	0.062887	0.179941	1.09015	3.93274	3.29657	0.0893962	100	0.9287				Oct 11 2018	UA 2754-5	54.7724	0.0324456	28.092	0.559257	0.0222889	0.00729373	10.9396	5.35389	0.217295	0.00464681	100	1.3948	Mineral contamination
	-	Oct 11 2018	UA 2754-10	77.3869	0.198735	12.7135	0.873443	0	0.0556901	1.13629	4.25108	3.32702	0.0739438	100	1.1979		Analysed concurrently with unknown sample		Oct 11 2018	UA 2754-7	58.136	0.0595531	25.9385	0.629102	0	0.0436784	7.77062	6.76851	0.653891	0	100	2.9521	Mineral contamination
	-	Oct 11 2018	UA 2754-11	77.5198	0.200322	12.3187	0.941607	0.0807063	0.140146	1.02593	3.9593	3.71254	0.130303	100	0.4613				Oct 11 2018	UA 2754-12	55.4684	0.0566759	28.469	0.284021	0.00336243	0.051671	9.72149	5.77827	0.167192	0	100	8.5484	Mineral contamination
	-	Oct 11 2018	UA 2754-6	77.8137	0.245206	12.364	1.03827	0.0936574	0.141961	1.01755	3.43504	3.74638	0.134592	100	1.3959
	-	Oct 11 2018	UA 2754-14	77.8375	0.211167	12.183	1.01801	0.0585584	0.188703	1.01437	3.88859	3.50809	0.118833	100	1.3036
	-	Oct 11 2018	UA 2754-3	78.059	0.297311	12.0583	1.10477	0.0620689	0.139373	0.860864	3.75099	3.57401	0.120563	100	0.8392
	-	Oct 11 2018	UA 2754-8	78.3751	0.274795	11.8552	1.04241	0.0960618	0.121459	0.801436	3.73748	3.59635	0.128676	100	0.3818
			Mean	77.4491	0.25642	12.4619	1.05554	0.0627567	0.143979	1.05536	3.92352	3.50214	0.115276	100	0.786911	9
			St. Dev.	0.710959	0.0436589	0.413797	0.132364	0.0298483	0.0563175	0.174091	0.283085	0.166572	0.0220577	0	0.448515
	-	Oct 11 2018	UA 2754-4	79.6408	0.248392	11.9362	0.577209	0.0260217	0.092451	0.16032	3.21154	4.02643	0.104208	100	0.7442
CL-2	a	Oct 11 2018	Casc13-14-8	69.122	0.838593	14.8695	3.63493	0.168838	0.836091	2.31993	5.054	3.03832	0.15207	100	1.2121				Oct 11 2018	Casc13-14-28	75.7525	0.259823	13.0049	1.59926	0.0117502	0.29672	1.39153	3.75607	3.71576	0.273326	100	6.3336	Low analytical total
	a	Oct 11 2018	Casc13-14-7	70.7793	0.509126	15.1338	2.40125	0.12974	0.508096	1.68267	5.70241	2.98693	0.21536	100	1.6418
	a	Oct 11 2018	Casc13-14-31	70.8972	0.480386	15.0889	2.30804	0.180414	0.568165	1.74245	5.45995	3.09468	0.232201	100	0.3153
	a	Oct 11 2018	Casc13-14-14	70.9896	0.50116	15.2438	2.31798	0.146012	0.538569	1.72501	5.305	3.04616	0.241152	100	1.0306
	a	Oct 11 2018	Casc13-14-19	71.0151	0.503788	15.2039	2.42776	0.0964249	0.452534	1.63027	5.31666	3.19508	0.204581	100	0.8047
	a	Oct 11 2018	Casc13-14-17	71.0404	0.435408	14.9507	2.44486	0.148297	0.464767	1.61073	5.57971	3.13191	0.249535	100	0.5298
	a	Oct 11 2018	Casc13-14-39	71.0428	0.456148	15.2257	2.35046	0.127261	0.503315	1.72452	5.3625	2.99962	0.268163	100	2.3542
	a	Oct 11 2018	Casc13-14-9	71.1103	0.452795	14.9614	2.43836	0.14625	0.585299	1.63634	5.54025	2.99159	0.17731	100	1.4357
	a	Oct 11 2018	Casc13-14-22	71.1135	0.445938	15.2755	2.40756	0.127415	0.534064	1.6809	5.32522	2.94529	0.186791	100	1.0831
	a	Oct 11 2018	Casc13-14-35	71.1603	0.427658	15.123	2.25926	0.169795	0.544569	1.68007	5.40238	3.07046	0.209869	100	0.9541
	a	Oct 11 2018	Casc13-14-37	71.1743	0.431171	15.0015	2.33563	0.132877	0.484401	1.70419	5.52958	2.99417	0.273997	100	3.4323
	a	Oct 11 2018	Casc13-14-5	71.326	0.425725	14.6847	2.42208	0.104277	0.418576	1.46782	5.59811	3.39094	0.208857	100	1.1898
	a	Oct 11 2018	Casc13-14-16	71.5238	0.445626	14.6484	2.54839	0.114549	0.423845	1.48787	5.38017	3.2686	0.204985	100	1.3905
	a	Oct 11 2018	Casc13-14-2	71.7312	0.493042	14.6173	2.35739	0.0983576	0.440744	1.49035	5.29839	3.32387	0.193048	100	1.5287
			Mean	71.0019	0.48904	15.002	2.47528	0.135036	0.521645	1.68451	5.41817	3.10554	0.215566	100	1.35019	14	Aniakchak like
			St. Dev.	0.593961	0.104949	0.225193	0.341483	0.0265811	0.104774	0.204714	0.164513	0.138722	0.0344254	0	0.778846
	b	Oct 11 2018	Casc13-14-18	73.453	0.232474	14.6142	1.49179	0.00778412	0.385135	1.88615	4.53771	3.13589	0.330374	100	3.0848
	b	Oct 11 2018	Casc13-14-25	73.5223	0.20325	14.7226	1.57816	0.0380761	0.363555	1.85455	4.41307	3.06713	0.306385	100	4.6593
	b	Oct 11 2018	Casc13-14-23	73.5585	0.21423	14.5266	1.50614	0.0410944	0.402844	1.77228	4.70818	3.02942	0.310785	100	2.4465
	b	Oct 11 2018	Casc13-14-4	73.8357	0.196332	14.2549	1.54243	0.0436464	0.362834	1.7125	4.52177	3.24632	0.366196	100	1.8476
	b	Oct 11 2018	Casc13-14-26	74.2934	0.185508	14.1869	1.44748	0.087004	0.329782	1.64211	4.40506	3.16269	0.335764	100	2.0218
			Mean	73.7326	0.206359	14.461	1.5132	0.043521	0.36883	1.77352	4.51716	3.12829	0.329901	100	2.812	5	Churchill like
			St. Dev.	0.345613	0.0179509	0.231192	0.0497552	0.0282995	0.0274378	0.100307	0.122813	0.0846868	0.0238239	0	1.13743
	c	Oct 11 2018	Casc13-14-3	73.8841	0.355377	13.7551	1.91253	0.122142	0.456443	2.08186	5.15492	2.09037	0.241775	100	0.2581
	c	Oct 11 2018	Casc13-14-20	73.9272	0.338827	13.8055	2.01293	0.118815	0.456154	2.38468	4.7518	2.00614	0.255692	100	0.9011
	c	Oct 11 2018	Casc13-14-21	74.0375	0.31004	13.9016	1.99692	0.101329	0.449872	2.32533	4.65049	2.02447	0.261453	100	2.0096
	c	Oct 11 2018	Casc13-14-36	74.8365	0.290385	13.5271	1.8397	0.152532	0.428029	2.01842	4.70416	1.98885	0.277005	100	1.3732
			Mean	74.1713	0.323657	13.7473	1.94052	0.123704	0.447624	2.20257	4.81534	2.02746	0.258981	100	1.1355	4	Augustine like
			St. Dev.	0.448121	0.0290333	0.158907	0.080357	0.021276	0.0134111	0.179551	0.23014	0.0443896	0.0145812	0	0.740569
	d	Oct 11 2018	Casc13-14-34	75.5179	0.302846	13.0751	1.61667	0.0661955	0.37459	1.82054	5.05458	2.0467	0.161341	100	2.4451
	d	Oct 11 2018	Casc13-14-10	75.7936	0.239847	13.3622	1.53246	0.033821	0.289392	1.55997	5.06154	2.01654	0.142784	100	1.9721
	d	Oct 11 2018	Casc13-14-15	76.0088	0.197529	13.0509	1.59497	0.0804576	0.307501	1.62437	4.97426	2.01301	0.191408	100	1.8067
	d	Oct 11 2018	Casc13-14-12	76.1313	0.265977	13.2125	1.50703	0.107911	0.28146	1.63323	4.75562	1.97119	0.17281	100	1.9247
			Mean	75.8629	0.25155	13.1752	1.56278	0.0720963	0.313236	1.65953	4.9615	2.01186	0.167086	100	2.03715	4
			St. Dev.	0.269037	0.0443271	0.143573	0.0515355	0.0308352	0.0423299	0.112197	0.142852	0.0310451	0.0203955	0	0.280717
	e	Oct 11 2018	Casc13-14-29	75.3489	0.413823	12.9052	1.73529	0.0838219	0.353416	1.44525	4.48193	3.08575	0.189392	100	2.8369
	e	Oct 11 2018	Casc13-14-27	75.7583	0.431833	13.0263	1.71271	0.0720182	0.330709	1.45591	4.03776	3.05439	0.154927	100	4.4075
	e	Oct 11 2018	Casc13-14-13	77.6614	0.0854513	12.574	0.537661	0.0719157	0.0828517	0.65296	4.36584	3.88552	0.106377	100	2.1396
	e	Oct 11 2018	Casc13-14-1	77.7369	0.25358	12.5118	0.908607	0.0376174	0.18278	0.807908	4.18751	3.29122	0.105907	100	2.3909
	e	Oct 11 2018	Casc13-14-11	77.9881	0.107163	12.1515	1.04251	0.0648719	0.138765	0.869934	3.91629	3.43575	0.368293	100	3.5854
			Mean	76.8987	0.25837	12.6338	1.18735	0.066049	0.217704	1.04639	4.19787	3.35053	0.184979	100	3.07206	5	Redoubt like
			St. Dev.	1.24233	0.163587	0.345986	0.523691	0.0172892	0.119189	0.377357	0.231262	0.337196	0.108348	0	0.926779
	-	Oct 11 2018	Casc13-14-32	76.3996	0.425763	12.4273	2.10352	0.102882	0.406572	2.26639	3.78103	1.95572	0.169521	100	1.7736		Augustine like
	-	Oct 11 2018	Casc13-14-33	76.3731	0.456558	12.2513	2.19896	0.135874	0.471881	2.18385	3.82756	1.99719	0.134027	100	1.5297		Augustine like
	-	Oct 11 2018	Casc13-14-30	75.317	0.205736	13.9632	1.35208	0.0376673	0.466959	1.81804	4.12761	2.52227	0.244626	100	3.6458
	-	Oct 11 2018	Casc13-14-24	77.6368	0.0877576	12.7426	0.466923	0.143067	0.0813368	0.646966	4.05583	4.06491	0.0952238	100	3.8602
	-	Oct 11 2018	Casc13-14-38	72.1125	0.345686	14.4287	2.19609	0.0556451	0.321856	1.23264	5.65495	3.48251	0.21899	100	4.5774
	-	Oct 11 2018	Casc13-14-6	78.1863	0.372545	11.476	1.44559	0.0744023	0.135569	0.78435	4.08733	3.28893	0.192357	100	3.8323
CL-4	a	Oct 11 2018	Casc13-16-5	64.6074	0.812718	15.9164	5.83777	0.175308	1.19397	3.46513	5.12524	2.68265	0.236937	100	2.8278				Oct 11 2018	Casc13-16-18	72.256	0.0841063	15.8256	1.42744	0.0614328	0.16404	0.825966	3.93921	5.01844	0.513513	100	22.6146	Low analytical total
	a	Oct 11 2018	Casc13-16-10	66.0557	1.12777	15.3903	4.69508	0.0582587	1.3628	4.12916	4.46003	2.65997	0.0786471	100	1.5615				Oct 11 2018	Casc13-16-3	64.5825	0.0108082	22.0271	0.249449	0.00744249	0.00525273	4.74887	7.48228	0.862102	0.0313748	100	2.546	Mineral contamination
	a	Oct 11 2018	Casc13-16-22	67.4407	0.572394	15.7589	3.87981	0.12389	1.01435	3.1643	5.06702	2.71594	0.339183	100	0.9416				Oct 11 2018	Casc13-16-12	55.9774	0.10801	27.1677	0.771068	0.0186629	0.0646292	10.1014	5.17888	0.593541	0.0239898	100	2.1	Mineral contamination
	a	Oct 11 2018	Casc13-16-15	68.3543	0.580238	15.6493	3.39714	0.149656	1.18467	3.22426	4.88139	2.46081	0.152771	100	1.8243				Oct 11 2018	Casc13-16-32	66.2752	0.324528	19.0034	1.4753	0.092112	0.297532	3.71673	6.69149	2.02945	0.121858	100	1.2876	Mineral contamination
			Mean	66.6145	0.77328	15.6787	4.45245	0.126778	1.18895	3.49571	4.88342	2.62984	0.201884	100	1.7888	4	Half cone like (Aniakchak)
			St. Dev.	1.63813	0.261304	0.221323	1.06764	0.0502721	0.142305	0.441856	0.300803	0.115008	0.11207	0	0.785323
	b	Oct 11 2018	Casc13-16-24	68.0324	0.514279	15.4031	3.70339	0.0869034	0.748975	2.23148	4.88809	4.18544	0.265891	100	2.7944
	b	Oct 11 2018	Casc13-16-23	70.711	0.566848	14.9286	2.36395	0.149258	0.471292	1.59829	5.95201	3.10384	0.200093	100	0.2321
	b	Oct 11 2018	Casc13-16-9	70.7279	0.498171	15.0363	2.41715	0.116841	0.524569	1.67165	5.9352	2.91971	0.196964	100	1.0012
	b	Oct 11 2018	Casc13-16-4	70.8369	0.47911	14.7331	2.41144	0.212883	0.54659	1.58869	5.88758	3.14642	0.203117	100	-0.011
	b	Oct 11 2018	Casc13-16-16	70.853	0.478595	15.0069	2.36001	0.10193	0.453278	1.64754	5.82214	3.10498	0.221792	100	-0.427
	b	Oct 11 2018	Casc13-16-28	70.8552	0.494233	15.0449	2.39902	0.126431	0.500879	1.62714	5.7454	3.04006	0.215398	100	0.7003
	b	Oct 11 2018	Casc13-16-33	70.883	0.523008	15.1092	2.38437	0.176894	0.543194	1.61306	5.54313	3.06595	0.204467	100	1.7987
	b	Oct 11 2018	Casc13-16-6	70.8995	0.414811	15.1237	2.31562	0.10995	0.543487	1.65874	5.65867	3.08847	0.241619	100	1.0108
	b	Oct 11 2018	Casc13-16-35	70.9443	0.468006	15.1228	2.37761	0.159793	0.547609	1.7906	5.39594	3.02553	0.216726	100	0.5716
	b	Oct 11 2018	Casc13-16-25	70.9659	0.519967	14.9985	2.3375	0.192979	0.482241	1.77049	5.41889	3.1337	0.232204	100	1.0062
	b	Oct 11 2018	Casc13-16-21	70.9697	0.502543	15.0587	2.36654	0.147848	0.503721	1.71426	5.48077	3.08341	0.222873	100	0.4553
	b	Oct 11 2018	Casc13-16-7	71.0304	0.478331	14.9166	2.22974	0.165423	0.533827	1.67765	5.66905	3.13402	0.212889	100	1.2801
	b	Oct 11 2018	Casc13-16-11	71.5208	0.474593	15.0017	2.40037	0.134371	0.487912	1.73072	5.04949	3.01388	0.240481	100	1.6289
	b	Oct 11 2018	Casc13-16-34	71.7972	0.429878	14.741	2.49888	0.145081	0.37745	1.49898	5.08073	3.26431	0.215163	100	2.6997
	b	Oct 11 2018	Casc13-16-30	71.8885	0.465234	14.769	2.44144	0.130306	0.414997	1.46569	4.99038	3.30968	0.160998	100	1.6185
			Mean	70.861	0.487174	14.9996	2.46714	0.143793	0.512001	1.68566	5.50117	3.17463	0.216712	100	1.09065	15	Aniakchak like
			St. Dev.	0.864783	0.037409	0.172247	0.347225	0.0343229	0.0825909	0.175332	0.357989	0.295286	0.0239515	0	0.914109
	-	Oct 11 2018	Casc13-16-1	73.8865	0.32271	13.9599	2.08521	0.0792516	0.421578	2.21105	4.97493	1.89975	0.205424	100	1.443
	-	Oct 11 2018	Casc13-16-13	74.4779	0.301266	13.5979	1.88518	0.111567	0.405458	2.08909	4.95369	2.01438	0.211192	100	0.5524
			Mean	74.1822	0.311988	13.7789	1.9852	0.0954094	0.413518	2.15007	4.96431	1.95707	0.208308	100	0.9977	2	Augustine like
			St. Dev.	0.418207	0.0151628	0.255992	0.14144	0.0228506	0.011399	0.0862354	0.0150147	0.0810514	0.00407813	0	0.629749
	-	Oct 11 2018	Casc13-16-27	74.457	0.18484	14.3526	1.36232	0.0721323	0.292519	1.63309	4.3051	3.12164	0.282598	100	1.3369
	-	Oct 11 2018	Casc13-16-14	76.3805	0.141855	13.2626	1.07625	0.0921304	0.199545	1.19169	4.10356	3.30154	0.323256	100	2.0486
			Mean	75.4188	0.163348	13.8076	1.21929	0.0821314	0.246032	1.41239	4.20433	3.21159	0.302927	100	1.69275	2	Churchill like
			St. Dev.	1.36013	0.030395	0.770734	0.202285	0.0141408	0.0657424	0.312117	0.142517	0.127203	0.0287497	0	0.503248
	c	Oct 11 2018	Casc13-16-31	76.532	0.116861	13.2444	0.75262	0.150781	0.141929	0.720744	4.35208	3.88707	0.131204	100	3.5929
	c	Oct 11 2018	Casc13-16-17	76.7385	0.157502	13.2852	0.653675	0.125866	0.0930725	0.683686	4.35212	3.83714	0.0944974	100	1.8851
	c	Oct 11 2018	Casc13-16-19	76.847	0.076603	13.2418	0.414275	0.0828602	0.0208543	0.747145	4.04707	4.47626	0.0596752	100	2.8641
			Mean	76.7058	0.116989	13.2571	0.606857	0.119836	0.0852854	0.717192	4.25042	4.06683	0.0951255	100	2.7807	3	Redoubt like
			St. Dev.	0.159999	0.0404497	0.0243892	0.173963	0.0343598	0.060912	0.0318782	0.176107	0.355462	0.0357686	0	0.856949
	-	Oct 11 2018	Casc13-16-26	77.3083	0.237913	12.4794	1.46366	0.0527771	0.381235	2.02178	4.13345	1.73304	0.243319	100	2.2947
	-	Oct 11 2018	Casc13-16-20	77.3209	0.197532	12.705	1.36776	0.0925369	0.210493	1.34931	4.45137	2.18389	0.156504	100	4.8801
	-	Oct 11 2018	Casc13-16-8	69.8104	0.315142	16.1662	2.2901	0.0469282	0.840951	3.44151	4.89519	1.93477	0.334234	100	2.3637		Mineral contamination?
	-	Oct 11 2018	Casc13-16-2	73.7037	0.446901	13.7439	1.75193	0.134988	0.179979	1.10906	5.25737	3.52333	0.192281	100	1.2885
	-	Oct 11 2018	Casc13-16-29	78.7816	0.106326	11.8437	0.966737	0.0605554	0.147276	0.746147	3.62825	3.4647	0.328794	100	2.6429
CL-7	a	Oct 11 2018	Casc13-19-15	70.6188	0.464296	15.0114	2.2781	0.120065	0.556302	1.73723	5.87214	3.18731	0.199414	100	0.8186				Oct 11 2018	Casc13-19-1	76.1057	0.0638725	11.088	0.607166	0.0856886	0.0651954	0.40842	3.37466	6.01322	2.82572	100	37.9404	Low analytical total
	a	Oct 11 2018	Casc13-19-4	70.9479	0.486151	14.9324	2.52124	0.0573628	0.826802	2.56324	4.82051	2.71668	0.164994	100	1.0666				Oct 11 2018	Casc13-19-2	70.1737	0.43685	14.9046	2.59761	0.136367	0.487627	1.59486	6.15575	3.02223	0.633367	100	16.5116	Low analytical total
	a	Oct 11 2018	Casc13-19-7	70.9555	0.510005	15.0431	2.31106	0.166193	0.551587	1.6971	5.54847	3.06384	0.197794	100	1.1394				Oct 11 2018	Casc13-19-19	69.9742	0.507876	14.917	2.8115	0.150442	0.623017	1.69348	5.66547	3.06165	0.768896	100	18.2542	Low analytical total
	a	Oct 11 2018	Casc13-19-3	71.0027	0.490079	14.9488	2.33706	0.155525	0.51756	1.66558	5.71654	2.97876	0.241969	100	1.1925				Oct 11 2018	Casc13-19-18	61.9823	0.0406588	23.7336	0.261753	0	0.0288336	5.52367	7.88575	0.537382	0.00763065	100	-0.057	Mineral contamination
	a	Oct 11 2018	Casc13-19-22	71.1274	0.456694	15.2274	2.36328	0.156096	0.503674	1.74651	5.05986	3.20413	0.200081	100	0.9922				Oct 11 2018	Casc13-19-16	68.4937	0.0502292	19.6022	0.00658667	0.00687759	0.0159163	0.109511	11.6721	0.0174742	0.0328644	100	1.3462	Mineral contamination
			Mean	70.9305	0.481445	15.0326	2.36215	0.131048	0.591185	1.88193	5.4035	3.03014	0.200851	100	1.04186	5	Aniakchak like		Oct 11 2018	Casc13-19-11	99.7324	0	0.123703	0.083737	0	0.00495423	0.0101226	0.0187533	0.00234934	0.0308808	100	0.9936	Biogenic silica
			St. Dev.	0.188472	0.0213253	0.117874	0.0943604	0.0447543	0.133584	0.38224	0.446263	0.198123	0.0273335	0	0.145885		K2O high
	b	Oct 11 2018	Casc13-19-10	76.5871	0.265091	12.899	1.47695	0.111545	0.254593	1.43058	4.87515	1.99267	0.138697	100	0.6573
	b	Oct 11 2018	Casc13-19-12	75.6591	0.305317	13.3274	1.59726	0.0724826	0.31714	1.56548	5.01342	2.00593	0.176369	100	1.5102
	b	Oct 11 2018	Casc13-19-9	76.0997	0.252711	13.2399	1.56356	0.030754	0.285233	1.65858	4.75467	2.00626	0.140147	100	1.6551
	b	Oct 11 2018	Casc13-19-20	76.0644	0.21352	13.1126	1.58729	0.0650235	0.309551	1.62153	4.91212	2.00933	0.135048	100	2.0692
	b	Oct 11 2018	Casc13-19-21	75.8271	0.193852	13.2181	1.56069	0.0912105	0.327369	1.61144	4.96796	2.09159	0.142737	100	1.4006
	b	Oct 11 2018	Casc13-19-17	74.7607	0.152721	14.0467	1.54295	0.0741438	0.471083	2.13309	4.38772	2.24627	0.238418	100	2.4733
			Mean	75.833	0.230535	13.3073	1.55478	0.0741933	0.327495	1.67012	4.81851	2.05867	0.161903	100	1.62762	6	Kamchatka?
			St. Dev.	0.61214	0.0547145	0.39096	0.0428289	0.0270508	0.07503	0.240251	0.22889	0.0985861	0.0404083	0	0.619317		Looks like KO
	-	Oct 11 2018	Casc13-19-13	77.2636	0.119359	12.8139	1.02977	0.0417445	0.194506	1.02094	3.77778	3.48113	0.332192	100	4.0711
	-	Oct 11 2018	Casc13-19-14	76.8778	0.113939	13.1162	0.668841	0.0929574	0.109205	0.724662	4.24034	3.9494	0.137835	100	4.7574
	-	Oct 11 2018	Casc13-19-8	72.5335	0.28125	14.867	1.68801	0.034518	0.439769	2.11566	4.62989	3.16186	0.320919	100	0.846
	-	Oct 11 2018	Casc13-19-6	68.5455	0.610589	15.0002	3.4925	0.0820686	0.777894	2.07907	4.88734	4.35468	0.219688	100	0.9317		Aniakchak like?
	-	Oct 11 2018	Casc13-19-5	65.0789	1.00711	15.0795	6.45771	0.185772	1.20225	3.31975	5.02841	2.45174	0.243853	100	1.223		Aniakchak like?
---	-	Oct 11 2018	Casc13-21-3	64.8484	0.873397	15.8319	6.02831	0.189821	1.19741	3.35937	4.82162	2.69399	0.201168	100	0.6454		Sample processed but very little glass		Oct 11 2018	Casc13-21-4	76.3169	0.0556982	13.7614	0.477678	0.0298704	0.0371503	0.778851	3.8745	4.44741	0.284787	100	10.2323	Low analytical total
	-	Oct 11 2018	Casc13-21-1	71.3364	0.39279	14.6909	2.34987	0.141254	0.45316	1.3981	5.74942	3.34206	0.188569	100	0.1188
	-	Oct 11 2018	Casc13-21-5	76.3178	0.0495816	13.7309	0.48531	0.0690382	0.0434452	0.778834	3.89365	4.56924	0.0803269	100	2.1411
	-	Oct 11 2018	Casc13-21-2	77.1584	0.202471	12.9892	1.34581	0.0594056	0.382884	2.29297	3.90643	1.5811	0.105019	100	1.5699
---	-	Oct 11 2018	Casc13-24-1	69.8161	0.55988	14.7457	3.48695	0.139451	0.625728	1.95401	5.38589	3.17562	0.142942	100	0.7903		Sample processed but very little glass		Oct 11 2018	Casc13-24-9	68.6685	0	19.2814	0.0254332	0	0	0.077421	11.8833	0.0633081	0.000787585	100	1.0901	Mineral contamination
	-	Oct 11 2018	Casc13-24-2	70.8752	0.42388	15.0162	2.309	0.177787	0.47292	1.64008	5.87052	3.01159	0.261923	100	3.1073
	-	Oct 11 2018	Casc13-24-7	72.7585	0.953579	12.5261	3.17266	0.0595165	0.480828	1.55494	4.29545	4.1512	0.0610861	100	3.0975
	-	Oct 11 2018	Casc13-24-3	74.5485	0.251651	14.0351	1.59372	0.0285572	0.401929	1.52196	4.03177	3.34037	0.318289	100	1.8357
	-	Oct 11 2018	Casc13-24-5	74.5584	0.304044	13.5895	1.99038	0.107682	0.430262	2.22495	4.60105	1.98061	0.275187	100	0.8201
	-	Oct 11 2018	Casc13-24-8	75.7095	0.305798	13.4635	1.65847	0.0451712	0.337316	1.73711	4.68682	1.92809	0.165694	100	1.7361
	-	Oct 11 2018	Casc13-24-6	77.9657	0.330677	11.5671	1.41677	0.0925586	0.113867	0.68917	4.32227	3.35882	0.184804	100	3.6048
	-	Oct 11 2018	Casc13-24-4	77.9798	0.158647	12.4687	1.10313	0.0737705	0.120348	1.05822	4.4341	2.41614	0.241638	100	1.4809
---	-	Oct 11 2018	Casc13-27-3	70.838	0.513855	15.0204	2.30829	0.123516	0.534054	1.64799	5.95954	2.89147	0.210311	100	0.8767		Sample processed but very little glass
	-	Oct 11 2018	Casc13-27-2	73.854	0.217493	14.3166	1.39255	0.0246883	0.329013	1.6052	4.81896	3.1868	0.328872	100	1.4392
	-	Oct 11 2018	Casc13-27-4	74.512	0.340769	13.7199	1.92997	0.118657	0.444204	2.20818	4.40602	2.10884	0.273192	100	1.019
	-	Oct 11 2018	Casc13-27-1	76.424	0.0994929	13.2262	0.639312	0.0821732	0.113703	0.715857	4.78169	3.82294	0.122229	100	3.6012
	-	Oct 11 2018	Casc13-27-5	77.1418	0.223613	12.2832	1.36278	0.0653845	0.261023	0.779314	3.72574	3.90788	0.3218	100	1.9599
---	-	Oct 11 2018	Casc13-33-1	73.6886	0.345982	14.3937	1.43783	0.0518928	0.398839	1.52804	5.39931	2.66892	0.112132	100	0.3522		Sample processed but very little glass		Oct 11 2018	Casc13-33-3	54.3521	2.66676	15.734	7.78645	0.45646	0.532419	8.77726	0.129111	0.0531995	12.2848	100	97.8778	Low analytical total
	-	Oct 11 2018	Casc13-33-2	73.987	0.30235	14.3521	1.45731	0.0404471	0.415673	1.64679	4.90518	2.79061	0.13257	100	3.0809
			Mean	73.8378	0.324166	14.3729	1.44757	0.04617	0.407256	1.58741	5.15225	2.72976	0.122351	100	1.71655	2
			St. Dev.	0.210953	0.0308521	0.0294309	0.0137703	0.00809328	0.011904	0.0839647	0.349397	0.0860449	0.0144522	0	1.92948
---	-	Oct 11 2018	Casc13-36-6	76.5302	0.0684796	13.0993	0.476002	0.0582914	0.045857	0.805124	4.08314	4.74294	0.117198	100	5.2141		Sample processed but very little glass		Oct 11 2018	Casc13-36-1	67.4707	0.0498648	19.9479	0.0435847	0	0.0147782	0.754085	11.5893	0.126716	0.0038732	100	0.3665	Mineral contamination
	-	Oct 11 2018	Casc13-36-7	76.3407	0.0616905	13.3846	0.407758	0.0480739	0.0454037	0.779356	4.06673	4.79597	0.0900025	100	2.1049				Oct 11 2018	Casc13-36-5	48.0817	0.614471	30.5035	5.81844	0.0609273	1.64677	0	0.397095	11.079	2.32225	100	44.2385	Low analytical total
			Mean	76.4354	0.0650851	13.242	0.44188	0.0531826	0.0456304	0.79224	4.07493	4.76946	0.1036	100	3.6595	2			Oct 11 2018	Casc13-36-4	78.9578	0.17105	12.0111	1.05958	0.024029	0.194001	0.803173	3.77154	2.67458	0.430132	100	17.1541	Low analytical total
			St. Dev.	0.133971	0.0048006	0.201753	0.048256	0.00722484	0.000320552	0.0182209	0.0116024	0.0374969	0.01923	0	2.19854
	-	Oct 11 2018	Casc13-36-2	78.1773	0.20192	12.0464	0.921981	0.0328077	0.0870963	0.628821	3.788	3.86752	0.320339	100	3.5654
	-	Oct 11 2018	Casc13-36-3	77.6712	0.184116	12.2373	0.951498	0.113869	0.0831567	0.719731	3.96614	3.84071	0.300063	100	2.5094
			Mean	77.9243	0.193018	12.1418	0.93674	0.0733386	0.0851265	0.674276	3.87707	3.85412	0.310201	100	3.0374	2
			St. Dev.	0.357905	0.0125894	0.134972	0.0208714	0.0573193	0.00278572	0.064283	0.125963	0.0189603	0.0143377	0	0.746705
CL-31	-	Oct 11 2018	Casc13-43-6	68.5914	1.21275	14.2241	4.37565	0.0487339	1.09083	2.86705	4.1928	3.35361	0.0555343	100	1.5059				Oct 11 2018	Casc13-43-13	99.8647	0.0424226	0.0254697	0	0.037199	0	0.00609192	0	0.0104443	0.0172245	100	-0.543	Biogenic silica
	-	Oct 11 2018	Casc13-43-5	69.2582	1.12703	14.029	3.99269	0.0290723	1.13793	2.88108	4.21082	3.25318	0.104839	100	1.394				Oct 11 2018	Casc13-43-12	66.694	0.0759167	19.6208	0.589258	0	0.167579	4.04055	7.22977	1.49406	0.113886	100	2.2982	Mineral contamination
			Mean	68.9248	1.16989	14.1265	4.18417	0.0389031	1.11438	2.87407	4.20181	3.3034	0.0801869	100	1.44995	2
			St. Dev.	0.471457	0.0606146	0.137983	0.270797	0.0139029	0.033309	0.0099188	0.0127417	0.0710167	0.034864	0	0.0791252
	-	Oct 11 2018	Casc13-43-1	70.7426	0.478319	14.9075	2.36716	0.143172	0.53263	1.65289	5.91727	3.11237	0.188437	100	-0.088
	-	Oct 11 2018	Casc13-43-17	70.7477	0.468096	14.9792	2.31258	0.116602	0.52897	1.6573	5.98339	3.03174	0.225116	100	-0.817
			Mean	70.7452	0.473207	14.9434	2.33987	0.129887	0.5308	1.65509	5.95033	3.07206	0.206776	100	-0.4525	2	Aniakchak like
			St. Dev.	0.00356728	0.00722905	0.0507267	0.0385943	0.0187876	0.00258799	0.00312145	0.0467489	0.0570143	0.0259357	0	0.515481
	-	Oct 11 2018	Casc13-43-2	76.7915	0.100024	13.1267	0.591195	0.134382	0.123901	0.711757	4.4009	3.91444	0.135978	100	3.4739
	-	Oct 11 2018	Casc13-43-3	76.8269	0.119912	13.2157	0.63239	0.0467639	0.108407	0.68481	4.3797	3.89943	0.11108	100	1.8516
			Mean	76.8092	0.109968	13.1712	0.611792	0.0905731	0.116154	0.698283	4.3903	3.90694	0.123529	100	2.66275	2
			St. Dev.	0.0250803	0.0140633	0.0629277	0.0291299	0.0619556	0.0109559	0.0190542	0.0149895	0.0106151	0.0176055	0	1.14714
	-	Oct 11 2018	Casc13-43-10	76.8078	0.266488	12.7533	1.1044	0.0605161	0.221453	1.08786	3.98631	3.59965	0.144897	100	0.7471
	-	Oct 11 2018	Casc13-43-18	76.8766	0.389127	12.6571	1.14489	0.0637913	0.208849	1.12059	4.04471	3.36611	0.165575	100	2.3879
			Mean	76.8422	0.327807	12.7052	1.12464	0.0621537	0.215151	1.10422	4.01551	3.48288	0.155236	100	1.5675	2	Redoubt like
			St. Dev.	0.0486531	0.0867189	0.0679812	0.0286292	0.00231588	0.00891264	0.0231444	0.0412964	0.16514	0.0146217	0	1.16022
	a	Oct 11 2018	Casc13-43-7	76.9179	0.109762	12.8788	1.03095	0.0340783	0.180584	1.14517	4.20693	3.27039	0.291057	100	1.0104
	a	Oct 11 2018	Casc13-43-9	77.3829	0.113476	12.6481	1.00585	0.0669388	0.138381	0.978987	4.07877	3.3539	0.300484	100	0.1371
	a	Oct 11 2018	Casc13-43-14	77.7699	0.136952	12.4201	1.03465	0.0961396	0.118127	0.917702	3.79431	3.46487	0.319322	100	2.5407
	a	Oct 11 2018	Casc13-43-8	78.1556	0.142842	11.9476	0.981857	0.038563	0.116925	0.820662	4.07013	3.49816	0.294136	100	2.7436
	a	Oct 11 2018	Casc13-43-15	78.5625	0.114427	12.0772	1.0691	0.027247	0.118651	0.78795	3.43529	3.55992	0.320088	100	3.1563
	a	Oct 11 2018	Casc13-43-11	78.7351	0.167115	11.3612	1.25923	0.0735048	0.215034	0.464437	3.44873	4.02447	0.324572	100	2.2513
			Mean	77.9206	0.130762	12.2222	1.06361	0.0560786	0.14795	0.852485	3.83903	3.52862	0.308276	100	1.97323	6	Similar to Mt. Churchill
			St. Dev.	0.699692	0.0224163	0.545808	0.100222	0.0270132	0.0409076	0.228771	0.335729	0.264216	0.0147259	0	1.1568
	-	Oct 11 2018	Casc13-43-16	74.3667	0.297785	13.5715	1.88054	0.136941	0.423254	2.06801	4.97907	2.08964	0.240825	100	0.303
	-	Oct 11 2018	Casc13-43-4	74.7066	0.38328	13.347	1.73049	0.0806681	0.497834	1.88067	4.45102	2.77811	0.18657	100	1.4294
CL-37	-	April 27 2018	Casc13-49_005	76.3828	0.117883	13.401	0.626782	0.114211	0.141223	0.810311	4.59018	3.70393	0.144245	100	5.172				April 27 2018	Casc13-49_008	77.0621	0.14525	12.3169	1.49414	0.0740444	0.492864	0.776486	3.7821	3.53918	0.409424	100	8.78443	Low analytical total
	-	April 27 2018	Casc13-49_001	76.4269	0.136388	13.3268	0.675147	0.0608485	0.129426	0.786612	4.82466	3.54381	0.115431	100	1.67714
	-	April 27 2018	Casc13-49_012	76.5078	0.0870369	13.2534	0.617475	0.0861158	0.122271	0.800975	4.57484	3.84512	0.135558	100	3.81553
	-	April 27 2018	Casc13-49_006	76.5736	0.124466	13.3303	0.602763	0.0885815	0.122326	0.749168	4.49675	3.81972	0.119233	100	4.18314
	-	April 27 2018	Casc13-49_004	76.7035	0.131037	13.4472	0.680925	0.0674822	0.122954	0.800656	4.26288	3.70505	0.101121	100	5.58548
	-	April 27 2018	Casc13-49_010	76.7771	0.0472684	13.3604	0.374859	0.0648937	0.072558	0.825149	4.03657	4.37704	0.0828975	100	1.98736
	-	April 27 2018	Casc13-49_011	76.7916	0.0684362	13.1319	0.625662	0.141264	0.118186	0.768074	4.39989	3.84646	0.140388	100	3.95574
	-	April 27 2018	Casc13-49_007	76.8963	0.105044	13.2346	0.579672	0.0883034	0.124102	0.731288	4.32223	3.79418	0.160487	100	4.90743
	-	April 27 2018	Casc13-49_002	77.0848	0.132924	13.0424	0.585899	0.0515538	0.125794	0.738422	4.26586	3.87028	0.131649	100	4.64516
	-	April 27 2018	Casc13-49_003	77.1085	0.13376	13.2143	0.609799	0.0673536	0.104519	0.727076	4.16599	3.77684	0.118629	100	3.03263
			Mean	76.7253	0.108424	13.2742	0.597898	0.0830607	0.118336	0.773773	4.39398	3.82824	0.124964	100	3.89616	10	Opala correlative
			St. Dev.	0.25595	0.0310737	0.124237	0.0851386	0.0273471	0.0184841	0.0357075	0.232321	0.215758	0.0224361	0	1.3111
	-	April 27 2018	Casc13-49_009	77.723	0.0553892	12.8673	0.516788	0.0944345	0.110418	0.663508	3.92638	3.95014	0.119705	100	5.67116
REF	-	Nov 16 2018	UA 3286-1	76.4024	0.166359	13.3926	0.69642	0.0851833	0.147067	0.771986	4.28465	3.9732	0.103526	100	2.62411		OP-22-U (Phase III), 2.5km north of Opala
Opala (1400 cal BP caldera formation)	-	Nov 16 2018	UA 3286-10	76.6255	0.1794	13.3722	0.647347	0.160642	0.114095	0.770829	4.17846	3.88251	0.0891718	100	2.28972		Andrews et al. (2018)
	-	Nov 16 2018	UA 3286-11	76.764	0.111322	13.2145	0.68293	0.125772	0.140028	0.743732	4.05896	4.11003	0.0630301	100	3.07808
	-	Nov 16 2018	UA 3286-12	76.1914	0.102386	13.5918	0.701133	0.190544	0.153402	0.798699	4.33126	3.87042	0.0890434	100	3.40999		Not analysed concurrently with unknown sample
	-	Nov 16 2018	UA 3286-13	76.639	0.12496	13.3445	0.696029	0.108542	0.115849	0.747965	4.24439	3.90113	0.100199	100	2.84528
	-	Nov 16 2018	UA 3286-14	76.4785	0.0607675	13.4814	0.710817	0.0937094	0.103293	0.751589	4.26974	3.97464	0.0976506	100	3.73643
	-	Nov 16 2018	UA 3286-15	76.7793	0.0770727	13.2917	0.716022	0.11908	0.10744	0.833135	4.24377	3.74326	0.115266	100	3.58848
	-	Nov 16 2018	UA 3286-16	76.6471	0.0839133	13.2691	0.72812	0.103223	0.143065	0.741104	4.34852	3.86679	0.0892006	100	3.35261
	-	Nov 16 2018	UA 3286-17	76.8567	0.120674	13.3543	0.676622	0.126828	0.120296	0.783496	4.21428	3.66617	0.104042	100	2.86263
	-	Nov 16 2018	UA 3286-18	76.7266	0.128284	13.1921	0.708113	0.141117	0.115652	0.783203	4.11888	4.01779	0.0880379	100	3.30191
	-	Nov 16 2018	UA 3286-19	76.7869	0.0581245	13.1397	0.732774	0.0691068	0.159281	0.795047	4.20773	3.96167	0.115843	100	2.92567
	-	Nov 16 2018	UA 3286-2	76.4486	0.111651	13.2875	0.626608	0.146886	0.106058	0.778903	4.33686	4.03629	0.155703	100	3.29432
	-	Nov 16 2018	UA 3286-20	76.539	0.135959	13.2363	0.661554	0.0998469	0.118492	0.764898	4.34083	4.01067	0.119429	100	2.05301
	-	Nov 16 2018	UA 3286-21	76.8962	0.155069	13.1702	0.679107	0.110471	0.095994	0.671235	4.25456	3.87776	0.115368	100	2.47412
	-	Nov 16 2018	UA 3286-22	76.5391	0.19499	13.258	0.694134	0.133257	0.122082	0.780428	4.24309	3.92764	0.138534	100	1.59957
	-	Nov 16 2018	UA 3286-23	76.6879	0.0527558	13.2396	0.667288	0.072969	0.11068	0.77433	4.40959	3.89809	0.111983	100	1.51985
	-	Nov 16 2018	UA 3286-24	76.4831	0.0944457	13.2743	0.749402	0.107526	0.143495	0.771602	4.40542	3.87551	0.122908	100	1.97758
	-	Nov 16 2018	UA 3286-25	76.6895	0.134302	13.3529	0.698299	0.1105	0.102218	0.730419	4.13826	3.97492	0.0885708	100	2.45658
	-	Nov 16 2018	UA 3286-26	76.7858	0.173032	13.2805	0.686939	0.087103	0.132555	0.739217	3.99093	4.03083	0.120004	100	3.37879
	-	Nov 16 2018	UA 3286-27	76.7639	0.127804	13.4099	0.659072	0.0632203	0.126574	0.785271	4.19047	3.77871	0.122825	100	2.77018
	-	Nov 16 2018	UA 3286-28	76.5946	0.12301	13.3558	0.653782	0.116817	0.102535	0.781048	4.344	3.82441	0.134342	100	2.66091
	-	Nov 16 2018	UA 3286-29	77.1605	0.0874961	13.1161	0.611654	0.0684096	0.0838508	0.780912	4.04873	3.94827	0.121654	100	1.82082
	-	Nov 16 2018	UA 3286-3	76.5724	0.0663936	13.3942	0.663391	0.162327	0.144593	0.805282	4.20519	3.91485	0.0922266	100	1.76155
	-	Nov 16 2018	UA 3286-30	76.516	0.0667869	13.4883	0.686598	0.113983	0.103841	0.770024	4.38849	3.79154	0.0962278	100	1.89842
	-	Nov 16 2018	UA 3286-4	76.8276	0.147695	13.2724	0.674276	0.124472	0.0957307	0.750065	4.1277	3.89996	0.103432	100	2.58301
	-	Nov 16 2018	UA 3286-5	76.4316	0.153922	13.2856	0.716384	0.116011	0.127443	0.784091	4.32342	3.95787	0.133836	100	3.62677
	-	Nov 16 2018	UA 3286-6	77.0463	0.116143	13.0307	0.645385	0.0970537	0.139575	0.696264	4.14042	3.9968	0.118099	100	1.28456
	-	Nov 16 2018	UA 3286-7	76.6913	0.184318	13.3383	0.660791	0.115809	0.0955753	0.800767	4.15464	3.8839	0.0962817	100	2.45703
	-	Nov 16 2018	UA 3286-8	76.5638	0.147014	13.3401	0.714417	0.0822631	0.122302	0.769419	4.2617	3.9121	0.11218	100	2.17239
	-	Nov 16 2018	UA 3286-9	76.3536	0.114466	13.45	0.736732	0.111792	0.137121	0.785794	4.33882	3.87892	0.11997	100	3.81459
			Mean	76.6496	0.120017	13.3075	0.686071	0.112149	0.121006	0.768025	4.23813	3.91289	0.109286	100	2.65397	30
			StDev	0.204083	0.039684	0.117948	0.0328461	0.0293271	0.0195955	0.0318852	0.108953	0.0934009	0.0190144	0	0.712805
---	-	April 27 2018	Casc13-51_001	74.0995	0.17867	14.4576	1.45659	0.0131731	0.345112	1.73857	4.3909	3.09737	0.287282	100	3.05244		Sample processed but very little glass		April 27 2018	Casc13-51_003	77.3189	0.151222	11.8898	1.08048	0.032128	0.175528	0.795243	4.16576	3.72348	0.861919	100	26.7804	Low analytical total
	-	April 27 2018	Casc13-51_002	73.7532	0.187608	14.2929	1.40579	0.066394	0.319829	1.77918	4.89975	3.07924	0.279061	100	2.0679
			Mean	73.9264	0.183139	14.3752	1.43119	0.0397835	0.332471	1.75887	4.64533	3.0883	0.283171	100	2.56017	2
			St. Dev.	0.244872	0.00631994	0.116494	0.0359219	0.0376328	0.0178782	0.0287178	0.359813	0.0128196	0.00581342	0	0.696175
	-	April 27 2018	Casc13-51_004	71.2304	0.476264	14.7716	2.46891	0.126917	0.423681	1.52147	5.7285	3.12242	0.167749	100	0.539912
---	-	April 27 2018	Casc13-55_002	76.7137	0.184535	12.9381	1.14206	0.0270133	0.238828	1.08532	3.91571	3.49625	0.333871	100	1.83731		Sample processed but very little glass		April 27 2018	Casc13-55_003	66.6473	0.0316919	20.5299	0.0224588	0	0	1.2212	11.4484	0.0912234	0.00995543	100	1.01883	Mineral contamination
																			April 27 2018	Casc13-55_001	75.9571	0.211449	12.9894	1.20126	0.0508526	0.196615	1.13258	4.19106	3.53167	0.694946	100	20.0532	Low analytical total
CL-48	a	May 23 2018	Casc13-60_001	73.1953	0.273248	14.8777	1.51786	0.0477442	0.352807	1.88428	4.47785	3.09875	0.354456	100	2.1942				May 23 2018	Casc13-60_018	62.3652	0.0220022	23.647	0.221185	0	0.0137108	5.94778	7.16116	0.596136	0.0334124	100	0.933	Mineral contamination
	a	May 23 2018	Casc13-60_013	74.2361	0.193197	14.3062	1.49052	0.0693159	0.320418	1.60586	4.08019	3.45674	0.311971	100	2.902				May 23 2018	Casc13-60_021	72.1742	0.0678059	17.3661	0.654604	0.0028141	0.059179	2.18601	4.87996	2.49512	0.147129	100	-1.438	Mineral contamination
	a	May 23 2018	Casc13-60_011	74.3609	0.315669	14.0859	1.6012	0.0812947	0.414815	1.5008	3.70653	3.68613	0.318592	100	2.6638				May 23 2018	Casc13-60_012	99.8805	0.00942074	0.0526088	0.0255012	0	0	0.0029458	0.00926845	0.0166989	0.0039689	100	0.4004	Biogenic silica
	a	May 23 2018	Casc13-60_010	74.4588	0.251295	14.1076	1.60169	0.0607197	0.383416	1.5191	3.69832	3.67372	0.316673	100	2.3526				Feb 5 2018	Br60-61_019	78.0269	0.0486655	13.2335	0.446871	0.167325	0.0954604	0.679675	3.10932	4.14501	0.0608409	100	6.22919	Low analytical total
	a	Feb 5 2018	Br60-61_014	74.3971	0.284694	13.8606	1.76471	0.0348468	0.433176	1.56159	4.23212	3.17188	0.334684	100	0.84875				May 23 2018	Casc13-60_008	77.1039	0.143097	12.8363	1.1209	0.0743846	0.198202	0.96296	3.86092	3.40077	0.385746	100	7.0003	Low analytical total
	a	Feb 5 2018	Br60-61_005	74.6423	0.245216	13.9598	1.67921	0.044579	0.375839	1.49113	4.0951	3.2097	0.331824	100	-0.412638				May 23 2018	Casc13-60_020	78.407	0.112652	11.6983	0.973787	0.0245703	0.107728	0.599629	3.96496	3.82753	0.366587	100	7.1312	Low analytical total
	a	Feb 5 2018	Br60-61_015	74.6709	0.183549	14.1942	1.46958	0.0563531	0.319041	1.6542	4.17519	2.95944	0.410043	100	2.40466				May 23 2018	Casc13-60_002	78.8576	0.212568	11.6842	0.985689	0.0170018	0.114201	0.581643	3.18626	4.00971	0.453295	100	11.6078	Low analytical total
	a	Feb 5 2018	Br60-61_007	74.7742	0.20988	14.1797	1.43487	0.0690786	0.354759	1.61884	3.90945	3.19923	0.322892	100	0.524848				Feb 5 2018	Br60-61_018	77.4199	0.12341	12.513	1.06629	0.0239344	0.157084	1.11988	3.79431	3.36636	0.537076	100	12.5862	Low analytical total
	a	Feb 5 2018	Br60-61_010	75.0807	0.138286	13.7956	1.14345	0.0418175	0.209842	1.44633	4.41789	3.48632	0.309788	100	3.92069				Feb 5 2018	Br60-61_004	79.9898	0.211116	10.7119	1.32599	0.0861131	0.293009	0.453038	2.33408	4.10773	0.629117	100	13.7785	Low analytical total
	a	Feb 5 2018	Br60-61_011	75.3923	0.152253	13.83	1.1772	0.0607632	0.211989	1.4189	3.95015	3.53466	0.351067	100	4.87829				Feb 5 2018	Br60-61_008	73.7174	0.330319	14.0746	1.88207	0.0411795	0.424588	1.62459	4.09189	3.19366	0.800156	100	15.0913	Low analytical total
			Mean	74.5209	0.224729	14.1197	1.48803	0.0566513	0.33761	1.5701	4.07428	3.34766	0.336199	100	2.22772	10
			St. Dev.	0.582805	0.0586716	0.316493	0.199511	0.0144385	0.0759558	0.133886	0.265762	0.252015	0.0301509	0	1.57612				May 23 2018	Casc13-60_019	74.794	0.112138	14.6853	0.766052	0.0718421	0.104343	1.75244	4.77686	2.78253	0.199179	100	-0.068	Mineral inclusion
	b	May 23 2018	Casc13-60_017	76.6906	0.172835	13.0681	1.10549	0.0405844	0.194433	1.11081	3.9395	3.45424	0.288628	100	4.0092				Feb 5 2018	Br60-61_009	72.6269	0.455223	14.5197	1.92914	0	0.456306	1.57805	4.95608	3.30695	0.221619	100	0.410718	Mineral inclusion
	b	Feb 5 2018	Br60-61_012	76.8951	0.148246	12.892	1.04628	0.0477748	0.199838	1.13859	3.8502	3.57748	0.264149	100	0.334465				Feb 5 2018	Br60-61_003	76.6896	0.197255	12.6403	1.57328	0.0883554	0.52196	0.942779	3.58553	3.48463	0.35691	100	2.51873	Mineral inclusion
	b	May 23 2018	Casc13-60_015	77.2174	0.152252	12.9428	0.952085	0.0136634	0.115191	1.09883	3.6847	3.63472	0.243216	100	3.637				May 23 2018	Casc13-60_009	74.7081	0.343185	13.5983	1.95152	0.0501036	0.409278	1.36911	3.48765	3.74503	0.436174	100	2.5426	Mineral inclusion
	b	May 23 2018	Casc13-60_003	77.3669	0.182748	12.6403	0.994995	0.0527558	0.151413	1.04714	3.71535	3.58147	0.344768	100	2.3387				May 23 2018	Casc13-60_006	77.607	0.0931875	12.5799	0.867615	0.0494556	0.131577	1.02403	4.21832	3.25693	0.222125	100	-0.866	Mineral inclusion
	b	Feb 5 2018	Br60-61_001	77.4881	0.182064	12.5468	1.08953	0.0314678	0.210855	0.960783	3.74161	3.52925	0.283934	100	-0.925397				May 23 2018	Casc13-60_004	76.4234	0.107135	13.7288	0.859963	0.0292795	0.112329	1.2851	3.88896	3.38338	0.234501	100	0.5823	Mineral inclusion
	b	May 23 2018	Casc13-60_016	77.6183	0.170647	12.6005	1.08572	0.00429057	0.118736	0.854085	3.56501	3.79558	0.241554	100	1.2282
	b	May 23 2018	Casc13-60_014	77.9541	0.106276	12.2553	1.29418	0.0652436	0.229523	0.944595	3.54897	3.37538	0.29247	100	2.5516
	b	May 23 2018	Casc13-60_005	78.0121	0.241124	12.0934	1.0517	0.0512376	0.125671	0.601319	3.56078	4.034	0.295362	100	1.2969
	b	Feb 5 2018	Br60-61_020	78.0294	0.113613	12.3724	0.926244	0.0242284	0.123404	0.91765	3.73373	3.51383	0.316907	100	1.01697
	b	May 23 2018	Br60-61_013	78.1436	0.211365	12.091	1.14622	0.0428766	0.133008	0.648428	3.50858	3.78143	0.378999	100	4.98557
	b	Feb 5 2018	Br60-61_017	78.6287	0.106302	11.9894	1.07818	0.0779726	0.126899	0.845844	3.50244	3.42253	0.286391	100	1.39491
	b	Feb 5 2018	Br60-61_016	79.0837	0.0865832	11.7075	0.994298	0.0372175	0.130798	0.74047	3.40908	3.57161	0.30834	100	5.17099
			Mean	77.7607	0.156171	12.4333	1.06374	0.0407761	0.154981	0.909046	3.64666	3.60596	0.295393	100	2.25326	12
			St. Dev.	0.691672	0.0465497	0.420879	0.0974093	0.0207322	0.041417	0.178518	0.156623	0.185273	0.0392223	0	1.88509
	a+b	Composite:	Mean	76.288	0.187334	13.1999	1.2566	0.0479921	0.237994	1.20953	3.84103	3.48855	0.313941	100	2.24165	22	White River Ash (northern lobe) correlative
			St. Dev.	1.76706	0.0618962	0.935118	0.262273	0.0194923	0.109701	0.371323	0.301021	0.250059	0.0403475	0	1.71061
	-	Feb 5 2018	Br60-61_006	78.0565	0.147668	12.4931	1.11721	0.0856654	0.161435	0.899238	3.23455	3.50754	0.383603	100	2.99235		Like above but Na off
	-	Feb 5 2018	Br60-61_002	77.731	0.0921085	12.0919	1.09284	0.0589827	0.153714	0.800128	4.18976	3.5263	0.339883	100	1.11337		Like above but Na off
	-	May 23 2018	Casc13-60_007	78.316	0.160654	12.8419	0.982325	0.064124	0.108617	1.0097	2.92767	3.36939	0.283405	100	2.5063		Like above but Na off
REF	-	May 30 2005	UA 1044-7	73.3027	0.24185	14.7913	1.62259	0.0726588	0.336307	1.81742	4.19992	3.29041	0.324889	100	3.65931		Duke River Fan, Yukon
White River Ash (northern lobe)	-	Oct 27 2005	UA1044-17	73.4361	0.288602	14.5825	1.68832	0.0630046	0.383109	1.80966	4.10516	3.32542	0.318072	100	1.59452		Jensen (2007)
	-	Oct 27 2005	UA1044-15	73.4385	0.19847	14.865	1.59607	0.111386	0.317958	1.64224	4.07006	3.42615	0.334159	100	1.24473
	-	Oct 27 2005	UA1044-11	73.5495	0.296944	14.5014	1.60289	0.0722021	0.325418	1.73549	4.3455	3.20455	0.366095	100	1.66486		Not analysed concurrently with unknown sample
	-	May 30 2005	UA 1044-23	73.5636	0.273847	14.3512	1.7188	0.074124	0.431361	1.86656	4.09045	3.28411	0.345912	100	2.86553
	-	May 30 2005	UA 1044-25	73.6433	0.162115	14.4467	1.58211	0.0718233	0.38169	1.84967	4.11953	3.36543	0.377585	100	2.53859
	-	May 30 2005	UA 1044-22	73.7185	0.159388	14.4573	1.82532	0.0541509	0.359644	1.76776	4.05952	3.24905	0.349427	100	2.12538
	-	May 30 2005	UA 1044-6	73.7209	0.147927	14.5051	1.61676	0.0821817	0.403718	1.79866	4.16729	3.2359	0.321536	100	2.65472
	-	Oct 25 2008	UA1044-12	73.7905	0.201447	14.4169	1.52463	0.0899865	0.372217	1.93133	4.19224	3.08807	0.392668	100	2.29419
	-	May 30 2005	UA 1044-9	73.8208	0.261231	14.5058	1.68258	0.063715	0.45981	1.62828	3.79843	3.41937	0.35999	100	5.83065
	-	Oct 25 2008	UA1044-16	73.8315	0.189988	14.4417	1.63042	0.0782305	0.322066	1.76358	4.30225	3.1344	0.30581	100	1.64084
	-	May 30 2005	UA 1044-3	73.8421	0.241023	14.8458	1.70134	0.0550613	0.379196	1.80825	3.57523	3.22057	0.331407	100	3.74367
	-	Oct 27 2005	UA1044-14	73.8514	0.281973	14.3614	1.68987	0.121279	0.325432	1.71407	4.08275	3.27665	0.295112	100	1.05448
	-	May 30 2005	UA 1044-19	73.9261	0.193789	14.187	1.68608	0.0953401	0.380324	1.68564	4.10668	3.39908	0.339908	100	3.50331
	-	May 30 2005	UA 1044-20	73.9483	0.230458	14.3546	1.56054	0.0723412	0.291432	1.72382	4.2139	3.20368	0.400977	100	3.23637
	-	Oct 25 2008	UA1044-29	73.9715	0.171419	14.1987	1.422	0.039719	0.344928	1.74542	4.65339	3.10798	0.344928	100	4.40242
	-	Oct 25 2008	UA1044-27	73.9801	0.217874	14.2815	1.43389	0.0113584	0.299448	1.78158	4.36007	3.31924	0.314937	100	3.22403
	-	May 30 2005	UA 1044-21	74.0247	0.233763	14.2935	1.64263	0.0926812	0.374844	1.77107	4.05938	3.18205	0.325414	100	2.89292
	-	May 30 2005	UA 1044-24	74.0248	0.246272	14.4085	1.58654	0.0143063	0.351526	1.76804	4.11344	3.1576	0.329044	100	2.14082
	-	Oct 27 2005	UA1044-13	74.0268	0.230877	14.1679	1.73311	0.075264	0.358012	1.50935	4.07773	3.47211	0.348859	100	1.67938
	-	Oct 25 2008	UA1044-28	74.0405	0.221143	14.3526	1.50667	0.0275155	0.296556	1.75085	4.25286	3.17521	0.376046	100	1.95693
	-	Oct 27 2005	UA1044-19	74.0913	0.294203	14.142	1.62065	0.0872465	0.397682	1.68832	4.11885	3.25835	0.301305	100	1.42871
	-	Oct 25 2008	UA1044-15	74.0939	0.208134	14.1591	1.47325	0.0846818	0.337707	1.81801	4.33887	3.14358	0.342808	100	2.06186
	-	May 30 2005	UA 1044-1	74.0985	0.259319	14.0758	1.79797	0.0798702	0.341264	1.61199	4.04562	3.39189	0.297698	100	3.59363
	-	Oct 27 2005	UA1044-8	74.1193	0.230597	14.2523	1.72019	0.0477448	0.327103	1.66904	4.06248	3.33452	0.236693	100	1.56004
	-	Oct 25 2008	UA1044-5	74.1416	0.266787	14.1953	1.52303	0.0750656	0.305334	1.81075	4.15159	3.18564	0.344896	100	1.49627
	-	Oct 25 2008	UA1044-9	74.1434	0.247824	14.1208	1.60682	0.0499727	0.319214	1.81408	4.1082	3.25011	0.339611	100	2.02169
	-	Oct 25 2008	UA1044-2	74.1549	0.190874	14.2047	1.4173	0.0477186	0.320831	1.65927	4.45772	3.11722	0.429467	100	1.60127
	-	Oct 25 2008	UA1044-25	74.1718	0.25293	14.163	1.54387	0.0245762	0.318466	1.78931	4.21152	3.17231	0.352259	100	2.42211
	-	Oct 27 2005	UA1044-12	74.2206	0.177193	14.216	1.70379	0.0273384	0.335148	1.59919	4.14171	3.25205	0.327048	100	1.2377
	-	Oct 25 2008	UA1044-4	74.2309	0.137519	14.2553	1.59513	0.0271022	0.322215	1.71193	4.2405	3.16222	0.317196	100	0.448376
	-	Oct 27 2005	UA1044-1	74.2345	0.230084	14.4697	1.47024	0.0368135	0.260762	1.74516	4.14136	3.08814	0.323141	100	2.20974
	-	Oct 27 2005	UA1044-2	74.2443	0.106981	14.3601	1.45705	0.0267453	0.263338	1.91907	4.17637	3.11685	0.329172	100	2.78649
	-	Oct 25 2008	UA1044-19	74.3029	0.235721	14.0212	1.67864	0.128941	0.349552	1.60623	4.0173	3.30184	0.357611	100	0.810241
	-	Oct 25 2008	UA1044-20	74.3043	0.249085	14.3108	1.56562	0.0408499	0.33477	1.72218	4.07867	3.07085	0.322814	100	-0.294333
	-	Oct 25 2008	UA1044-18	74.3533	0.265264	14.0323	1.54215	0.0608973	0.412863	1.73763	3.94063	3.35866	0.296229	100	3.18029
	-	Oct 25 2008	UA1044-11	74.3574	0.233933	13.9848	1.53512	0.0430928	0.320118	1.78315	4.12788	3.27078	0.343717	100	2.61158
	-	Oct 25 2008	UA1044-22	74.381	0.192748	14.2307	1.49513	0.0444026	0.256324	1.72108	4.19003	3.1213	0.36733	100	0.988798
	-	May 30 2005	UA 1044-8	74.4473	0.142567	14.1309	1.42912	0.0628972	0.315534	1.5748	4.18695	3.39645	0.313438	100	4.60628
	-	Oct 25 2008	UA1044-23	74.4768	0.199338	14.0553	1.34115	0.072209	0.306125	1.70258	4.25755	3.23408	0.354943	100	1.75306
	-	Oct 25 2008	UA1044-21	74.5006	0.21727	14.0321	1.68336	0.018275	0.392913	1.64969	3.96511	3.19442	0.34621	100	1.58193
	-	May 30 2005	UA 1044-12	74.5682	0.153976	14.1907	1.51569	0.0780281	0.264255	1.58447	4.02516	3.35001	0.269457	100	3.88083
	-	Oct 25 2008	UA1044-24	74.5924	0.139008	14.1325	1.43203	0.0638406	0.247125	1.66232	4.30328	3.12379	0.303758	100	2.94965
	-	Oct 25 2008	UA1044-1	74.6821	0.126917	14.1021	1.43201	0.0481057	0.287611	1.73488	4.13846	3.11825	0.329575	100	2.37121
	-	May 30 2005	UA 1044-14	74.989	0.215408	13.6253	1.6221	0.0443184	0.361762	1.34651	3.88009	3.5867	0.328781	100	2.97481
	-	May 30 2005	UA 1044-4	75.0167	0.126156	13.9507	1.28789	0.0872579	0.275441	1.52487	4.03454	3.34313	0.353237	100	4.87966
	-	Oct 27 2005	UA1044-10	75.0764	0.165394	13.82	1.35836	0	0.244539	1.59184	4.28441	3.17698	0.282083	100	1.44728
	-	Oct 27 2005	UA1044-5	75.1195	0.248793	13.8391	1.3193	0.00725646	0.225987	1.5109	4.0404	3.39229	0.296478	100	3.53427
	-	Oct 27 2005	UA1044-4	75.3929	0.117768	14.0297	1.30331	0.059396	0.234512	1.54143	3.94983	3.09258	0.278547	100	2.35026
	-	Oct 27 2005	UA1044-9	75.4783	0.162627	13.6302	1.41806	0	0.272401	1.4017	4.06477	3.3056	0.266302	100	1.61551
	-	May 30 2005	UA 1044-16	75.612	0.142855	13.9488	1.20337	0.114284	0.240813	1.49062	3.80953	3.19384	0.243875	100	1.99884
	-	Oct 27 2005	UA1044-3	75.6194	0.24334	13.3428	1.4809	0.032718	0.300597	1.41217	3.92279	3.3355	0.309799	100	2.19451
	-	May 30 2005	UA 1044-17	75.6399	0.185055	13.8791	1.19823	0.00925276	0.26319	1.40705	3.89184	3.33099	0.195336	100	2.73175
	-	May 30 2005	UA 1044-15	75.6983	0.0924321	13.8544	1.19167	0.0394654	0.235754	1.46336	3.86652	3.27147	0.286643	100	3.71311
	-	Oct 27 2005	UA1044-18	75.7097	0.327814	13.0212	1.64293	0	0.325784	0.992962	3.87328	3.7927	0.313605	100	1.4685
			Mean	74.3221	0.20866	14.1836	1.53925	0.0565217	0.323855	1.67031	4.1089	3.26131	0.325524	100	2.40297	55
			St. Dev.	0.627651	0.0538864	0.326522	0.149708	0.0314811	0.053262	0.163017	0.175097	0.134206	0.0402661	0	1.14908
REF	-	Aug 22 2019	UT1480-13	71.6921	0.206501	15.4776	1.78929	0.0854836	0.477393	2.17693	4.65028	3.19232	0.325544	100	3.5523		Sixtymile, Yukon, sample 16		Aug 22 2019	UT1480-9	61.8459	0.0480138	23.6911	0.325292	0.0208049	0.0336426	6.18273	7.11415	0.708135	0.0390407	100	2.9654	Mineral contamination
White River Ash (northern lobe)	-	Aug 22 2019	UT1480-25	71.7643	0.252213	15.3284	1.79539	0.0653205	0.479807	2.23111	4.68108	3.08637	0.408093	100	3.7806		Preece et al. (2014)		Aug 22 2019	UT1480-8	75.4623	0.216407	13.0739	1.75299	0.0823818	0.440569	1.26288	3.84478	3.55298	0.401351	100	6.449	Low analytical total
	-	Aug 22 2019	UT1480-32	71.8183	0.319933	15.3415	1.80995	0.0903131	0.507737	2.2954	4.41254	3.11846	0.36914	100	3.2056				Aug 22 2019	UT1480-29	73.4666	0.259608	13.997	1.63321	0.0952361	0.407271	1.70355	4.5174	3.63237	0.371625	100	11.8853	Low analytical total
	-	Aug 22 2019	UT1480-20	72.0465	0.294313	14.9686	1.95504	0.0933076	0.536915	2.15155	4.43378	3.22722	0.378029	100	2.6317		Not analysed concurrently with unknown sample
	-	Aug 22 2019	UT1480-33	72.0636	0.311601	15.232	1.7946	0.0696166	0.458153	2.15027	4.57169	3.07132	0.357867	100	2.993
	-	Aug 22 2019	UT1480-34	72.0783	0.29804	15.3465	1.70616	0.10889	0.480404	2.2156	4.29206	3.18544	0.372644	100	3.0404
	-	Aug 22 2019	UT1480-14	72.2325	0.226554	15.2934	1.65824	0.0774362	0.468883	2.14772	4.62197	2.9882	0.368085	100	1.6597
	-	Aug 22 2019	UT1480-18	72.2366	0.246174	14.9861	1.63107	0.0921655	0.458537	2.02526	4.93028	3.13049	0.340009	100	1.512
	-	Aug 22 2019	UT1480-3	72.2663	0.319493	15.181	1.70873	0.0627117	0.435226	2.22339	4.3971	3.12714	0.360287	100	2.4887
	-	Aug 22 2019	UT1480-27	72.2777	0.278042	14.9536	1.82929	0.0509846	0.498373	2.21409	4.3879	3.21886	0.376082	100	2.8687
	-	Aug 22 2019	UT1480-24	72.3202	0.285464	14.9833	1.90181	0.0467121	0.473918	2.23115	4.22376	3.23915	0.380333	100	3.1407
	-	Aug 22 2019	UT1480-2	72.4918	0.250491	15.0878	1.84528	0.0712109	0.460341	2.20165	4.26405	3.06098	0.34384	100	2.5809
	-	Aug 22 2019	UT1480-12	72.5288	0.251792	15.1916	1.69553	0.0314184	0.424737	2.05414	4.40507	3.15227	0.341678	100	2.9295
	-	Aug 22 2019	UT1480-10	72.5662	0.236563	15.1312	1.62934	0.0177356	0.417425	2.1257	4.42939	3.15461	0.37693	100	1.6947
	-	Aug 22 2019	UT1480-4	72.6797	0.266199	15.1524	1.74575	0.0566074	0.469979	2.13955	4.18066	3.03992	0.347758	100	4.8906
	-	Aug 22 2019	UT1480-15	72.6982	0.183356	15.1661	1.44684	0.0350486	0.404041	2.19778	4.8575	2.83282	0.230225	100	2.2472
	-	Aug 22 2019	UT1480-19	72.7079	0.183109	15.056	1.67063	0.0408395	0.421701	2.0984	4.53997	2.97312	0.398248	100	2.5699
	-	Aug 22 2019	UT1480-17	73.2322	0.202817	14.9183	1.53716	0.0508372	0.373362	1.90239	4.36079	3.14919	0.352551	100	2.3058
	-	Aug 22 2019	UT1480-30	74.0799	0.261241	14.2045	1.56769	0.0575809	0.377533	1.64692	4.04878	3.46318	0.378026	100	2.6413
	-	Aug 22 2019	UT1480-16	74.7467	0.131291	14.2318	1.16256	0.0429793	0.267236	1.60795	4.38871	3.20005	0.285095	100	3.3675
	-	Aug 22 2019	UT1480-1	75.9622	0.172935	13.33	1.31562	0.0266792	0.237172	1.14037	4.10919	3.50263	0.262247	100	3.7753
	-	Aug 22 2019	UT1480-28	75.9627	0.157323	13.2964	1.23351	0.0436346	0.261342	1.2678	4.15878	3.39622	0.287055	100	3.0311
	-	Aug 22 2019	UT1480-31	76.0626	0.142919	13.1661	1.2597	0.0286732	0.245151	1.16979	4.27997	3.44432	0.25927	100	2.5293
	-	Aug 22 2019	UT1480-26	76.2251	0.11472	13.8153	0.998152	0	0.131248	1.54944	3.83934	3.09566	0.298572	100	3.6132
	-	Aug 22 2019	UT1480-6	76.2877	0.120887	13.2044	1.19313	0	0.202009	1.15678	4.24654	3.33298	0.330005	100	1.9086
	-	Aug 22 2019	UT1480-7	76.4411	0.152743	13.1551	1.03116	0.0648035	0.198026	1.15365	4.03248	3.53904	0.299473	100	3.6287
	-	Aug 22 2019	UT1480-5	76.5172	0.11998	13.3142	1.07628	0.0316781	0.168627	1.14329	3.90724	3.4451	0.356893	100	3.6591
	-	Aug 22 2019	UT1480-22	76.7942	0.12205	13.155	1.06485	0.0739439	0.167997	1.15587	3.80301	3.45141	0.273416	100	2.5072
	-	Aug 22 2019	UT1480-23	76.8409	0.141159	13.116	1.12234	0.0680411	0.153709	1.21676	3.85006	3.25617	0.303341	100	3.0571
	-	Aug 22 2019	UT1480-11	77.3565	0.161247	12.399	1.06869	0.0828876	0.171653	0.801615	4.12794	3.58295	0.31977	100	2.1904
	-	Aug 22 2019	UT1480-21	77.4587	0.159833	12.6363	1.13283	0.0502595	0.117661	0.975705	3.62104	3.60133	0.318302	100	1.33
			Mean	73.9496	0.211967	14.3813	1.49602	0.0554129	0.353106	1.76671	4.29203	3.23416	0.335445	100	2.81712	31
			St. Dev.	2.06229	0.0670351	0.990966	0.311226	0.0267783	0.13657	0.493423	0.306504	0.194314	0.0444531	0	0.779599
REF	-	Aug 22 2019	UT1482-10	71.6694	0.292797	15.0265	2.02776	0.0905254	0.536182	2.1353	4.24093	3.64503	0.433307	100	4.0866		Sixtymile, Yukon, sample 17
White River Ash (northern lobe)	-	Aug 22 2019	UT1482-29	71.8184	0.310064	15.2573	1.81441	0.0655321	0.473317	2.28949	4.66132	3.02165	0.372509	100	2.4036		Preece et al. (2014)
	-	Aug 22 2019	UT1482-9	71.9022	0.273461	15.1306	1.87438	0.0915753	0.456579	2.41851	4.57203	2.96226	0.41107	100	2.1417
	-	Aug 22 2019	UT1482-20	71.9765	0.282518	15.3865	1.89245	0.0484767	0.482204	2.28487	4.18504	3.18669	0.354779	100	4.2283		Not analysed concurrently with unknown sample
	-	Aug 22 2019	UT1482-19	71.9932	0.313709	15.2142	1.86595	0.0562709	0.492444	2.30181	4.31191	3.16665	0.366575	100	3.3159
	-	Aug 22 2019	UT1482-27	71.9932	0.250305	15.3164	1.77418	0.0354027	0.484165	2.22801	4.3972	3.2055	0.407693	100	4.8266
	-	Aug 22 2019	UT1482-28	72.0432	0.310328	15.3178	1.84494	0.0704068	0.498913	2.33094	4.22956	3.05142	0.390696	100	2.0023
	-	Aug 22 2019	UT1482-14	72.0744	0.238207	15.2485	1.75805	0.0632359	0.403759	2.22561	4.42701	3.279	0.364535	100	3.2796
	-	Aug 22 2019	UT1482-32	72.3742	0.254126	15.0845	1.67555	0.0691003	0.423813	2.13089	4.62022	3.10349	0.341182	100	2.0843
	-	Aug 22 2019	UT1482-26	72.4375	0.258721	15.2176	1.70684	0.0447094	0.428168	2.11998	4.47647	3.0521	0.333255	100	1.5755
	-	Aug 22 2019	UT1482-21	72.4537	0.299303	15.1163	1.8438	0.0227761	0.488934	2.18259	4.09999	3.20066	0.377169	100	3.5392
	-	Aug 22 2019	UT1482-16	72.5242	0.268387	14.9639	1.67493	0.0667828	0.469786	2.09442	4.60281	3.00968	0.419803	100	3.3568
	-	Aug 22 2019	UT1482-22	72.5374	0.309242	15.2856	1.68054	0.0734421	0.410479	2.1663	4.21987	3.02666	0.375096	100	2.7411
	-	Aug 22 2019	UT1482-12	72.5692	0.264009	14.4748	2.0197	0.0329224	0.504985	2.06155	4.46287	3.31912	0.375816	100	2.7197
	-	Aug 22 2019	UT1482-5	72.606	0.291508	14.8212	1.90926	0.103042	0.49795	2.042	4.08462	3.31992	0.419039	100	2.584
	-	Aug 22 2019	UT1482-15	72.627	0.260721	14.8817	1.66982	0.0363696	0.404562	1.94775	4.79953	3.11124	0.3375	100	2.9465
	-	Aug 22 2019	UT1482-24	72.6359	0.228575	15.256	1.75959	0.0524605	0.439021	2.11552	4.19707	3.04277	0.352836	100	3.0661
	-	Aug 22 2019	UT1482-18	72.7349	0.262888	15.007	1.75562	0.0355135	0.426851	2.10872	4.20241	3.16991	0.382415	100	2.8483
	-	Aug 22 2019	UT1482-17	72.859	0.262708	14.937	1.5837	0.0375678	0.409532	2.13624	4.32533	3.20159	0.319475	100	3.9577
	-	Aug 22 2019	UT1482-3	73.0099	0.229509	14.9305	1.65382	0.0513396	0.405954	2.06592	4.14478	3.20811	0.387728	100	4.0312
	-	Aug 22 2019	UT1482-1	73.7918	0.289633	14.3437	1.59057	0.0728195	0.386279	1.67853	4.23325	3.34075	0.352229	100	2.7404
	-	Aug 22 2019	UT1482-11	74.1755	0.203278	14.5656	1.33791	0.059621	0.312812	1.58346	4.42831	3.12102	0.274401	100	2.7238
	-	Aug 22 2019	UT1482-8	74.4718	0.196666	14.3747	1.4216	0.0514051	0.271111	1.60882	4.24595	3.145	0.274962	100	3.8131
	-	Aug 22 2019	UT1482-2	74.5321	0.192901	14.0771	1.54725	0.0776663	0.338727	1.51239	4.13156	3.33549	0.329248	100	2.8948
	-	Aug 22 2019	UT1482-25	74.5563	0.180446	14.3971	1.45444	0.0622973	0.32633	1.57798	4.08092	3.10768	0.331299	100	2.8385
	-	Aug 22 2019	UT1482-4	74.7728	0.220886	14.2954	1.46844	0.0673392	0.376042	1.54221	3.73283	3.28845	0.304226	100	2.9985
	-	Aug 22 2019	UT1482-23	75.2822	0.142819	13.934	1.0441	0.0667204	0.20678	1.39866	4.48871	3.21798	0.28174	100	3.4418
	-	Aug 22 2019	UT1482-30	75.7069	0.128489	13.2722	1.26601	0.072772	0.262229	1.26055	4.29652	3.49883	0.304127	100	1.9046
	-	Aug 22 2019	UT1482-13	75.8296	0.170471	13.3156	1.38072	0.0706438	0.320384	1.14506	3.93292	3.59645	0.307527	100	4.0623
	-	Aug 22 2019	UT1482-31	75.9618	0.150696	13.3199	1.2333	0.0237571	0.236434	1.28234	4.1434	3.41052	0.307305	100	2.3872
	-	Aug 22 2019	UT1482-33	76.0341	0.200085	13.5148	1.22988	0.0296628	0.233069	1.26873	4.02175	3.22669	0.311662	100	3.2088
	-	Aug 22 2019	UT1482-34	76.7749	0.0414224	12.8423	1.07448	0.062894	0.196808	1.0849	4.27374	3.43587	0.274692	100	2.094
	-	Aug 22 2019	UT1482-6	77.5949	0.17697	12.4817	1.00746	0.0500146	0.11165	0.896168	3.78365	3.70033	0.254741	100	5.3436
	-	Aug 22 2019	UT1482-7	77.8783	0.120112	12.4757	1.05163	0.0404563	0.113403	0.854963	3.64846	3.63002	0.241441	100	1.7706
			Mean	73.653	0.231646	14.5025	1.58509	0.0575153	0.377343	1.82592	4.25597	3.24525	0.343296	100	3.05756	34
			St. Dev.	1.79762	0.0649536	0.866055	0.291101	0.0195268	0.11509	0.457288	0.258852	0.194818	0.0502602	0	0.877386
---	-	Aug 17 2018	Casc13-63_002	70.6986	0.501599	15.2232	2.38783	0.101323	0.541007	1.75793	5.48718	3.13596	0.213626	100	0.8531		Sample processed but very little glass		Aug 17 2018	Casc13-63_001	68.7354	0.0220514	19.4604	0.0204142	0	0.00103838	0.0378514	11.6662	0.046559	0.012778	100	0.13318	Mineral contamination
	-	Aug 17 2018	Casc13-63_003	70.8188	0.492445	15.2586	2.29756	0.128128	0.51421	1.64871	5.65564	3.03129	0.198972	100	-0.123
			Mean	70.7587	0.497022	15.2409	2.3427	0.114726	0.527608	1.70332	5.57141	3.08363	0.206299	100	0.36505	2	Aniakchak like
			St. Dev.	0.084968	0.00647275	0.0250761	0.0638281	0.018954	0.0189489	0.0772265	0.119121	0.0740138	0.0103621	0	0.690207
CL-61	a	Aug 17 2018	Casc13-73_011	70.5658	0.423465	15.2764	2.32481	0.153672	0.489558	1.68281	6.01922	2.89648	0.216033	100	-0.275				Aug 17 2018	Casc13-73_012	69.1276	0	19.3182	0	0	0.0102908	0.000344933	11.5222	0.0213958	0	100	0.27036	Mineral contamination
	a	Aug 17 2018	Casc13-73_001	71.008	0.475127	15.1348	2.37983	0.129891	0.45309	1.59387	5.57369	3.08429	0.215443	100	-0.558
	a	Aug 17 2018	Casc13-73_009	72.1186	0.402931	14.7435	2.45528	0.163121	0.382431	1.42027	4.90067	3.27448	0.179052	100	0.0008
			Mean	71.2308	0.433841	15.0516	2.38664	0.148895	0.441693	1.56565	5.49786	3.08508	0.203509	100	-0.2774	3	Aniakchak like
			St. Dev.	0.799989	0.0371993	0.276021	0.0655024	0.0171224	0.0544651	0.133525	0.563116	0.188997	0.0211824	0	0.279408
	-	Aug 17 2018	Casc13-73_010	74.2477	0.307442	14.1884	1.93689	0.0827359	0.481553	2.28705	4.52863	1.75058	0.244238	100	0.8109
	-	Aug 17 2018	Casc13-73_013	74.4729	0.34094	14.0144	1.94572	0.0810601	0.473925	2.25099	4.48773	1.73651	0.252983	100	0.9599
			Mean	74.3603	0.324191	14.1014	1.9413	0.081898	0.477739	2.26902	4.50818	1.74354	0.24861	100	0.8854	2
			St. Dev.	0.159234	0.0236864	0.122986	0.00624427	0.00118498	0.0053936	0.0254972	0.0289242	0.00994664	0.00618426	0	0.105359
	-	Aug 17 2018	Casc13-73_002	75.9101	0.316183	13.3744	1.64644	0.0618971	0.371222	1.84015	4.34513	2.03768	0.125271	100	1.9259
	-	Aug 17 2018	Casc13-73_006	76.2137	0.314048	13.1767	1.69555	0.0597003	0.367629	1.74066	4.3426	1.98567	0.134012	100	0.1278
			Mean	76.0619	0.315116	13.2756	1.67099	0.0607987	0.369426	1.79041	4.34387	2.01168	0.129641	100	1.02685	2
			St. Dev.	0.214713	0.00150969	0.139751	0.0347247	0.00155336	0.00254102	0.0703464	0.00179115	0.0367809	0.0061813	0	1.27145
	b	Aug 17 2018	Casc13-73_014	77.3295	0.216428	12.874	1.30225	0.0641608	0.333559	2.03327	4.18349	1.57819	0.110035	100	0.9754
	b	Aug 17 2018	Casc13-73_005	77.5876	0.236337	12.813	1.22167	0.0205768	0.356931	2.00366	3.96415	1.72631	0.0900865	100	2.0108
	b	Aug 17 2018	Casc13-73_008	77.7629	0.193133	12.786	1.14977	0.0272066	0.325303	2.11063	4.06144	1.52309	0.0782545	100	-1.299
	b	Aug 17 2018	Casc13-73_007	78.1078	0.19801	12.4245	1.26604	0.0844456	0.33399	2.04745	3.81652	1.63756	0.108182	100	0.0741
			Mean	77.6969	0.210977	12.7244	1.23493	0.0490974	0.337446	2.04875	4.0064	1.61629	0.0966396	100	0.440325	4	Augustine like
			St. Dev.	0.326657	0.0196588	0.203275	0.065644	0.0303811	0.0135913	0.0451069	0.155166	0.0869755	0.0152056	0	1.40381
	-	Aug 17 2018	Casc13-73_004	78.0969	0.4436	11.4322	1.3941	0	0.144205	0.449927	3.89671	4.07687	0.0845125	100	0.2266
	-	Aug 17 2018	Casc13-73_003	77.6391	0.435176	11.8447	1.21334	0.0614016	0.0957091	0.580275	4.2698	3.809	0.0664964	100	0.3104
			Mean	77.868	0.439388	11.6384	1.30372	0.0307008	0.119957	0.515101	4.08326	3.94294	0.0755045	100	0.2685	2	Redoubt like
			St. Dev.	0.323696	0.00595696	0.291654	0.127819	0.0434175	0.0342916	0.0921704	0.263817	0.189409	0.0127393	0	0.0592555
CL-74	-	Aug 17 2018	Casc13-86_015	72.4685	0.380262	14.5527	2.45959	0.10906	0.594933	2.51726	4.78067	1.98585	0.195125	100	0.0166
	-	Aug 17 2018	Casc13-86_014	72.7492	0.423747	14.2371	2.32014	0.106552	0.657217	2.44741	5.05769	1.86421	0.176793	100	-0.587
	-	Aug 17 2018	Casc13-86_010	73.3176	0.30239	14.2017	1.92918	0.103083	0.467937	2.27463	5.27719	1.93147	0.251863	100	1.2594
	-	Aug 17 2018	Casc13-86_023	73.3405	0.321152	13.9563	2.06107	0.124243	0.488125	2.2389	5.31424	1.96139	0.249997	100	-1.195
	-	Aug 17 2018	Casc13-86_002	73.5131	0.319713	14.1646	1.96787	0.0980793	0.43206	2.29422	5.01774	1.97373	0.28265	100	2.5319
	-	Aug 17 2018	Casc13-86_029	73.54	0.315621	14.1212	2.0898	0.0972153	0.516547	2.28989	4.93028	1.91255	0.241354	100	0.1793
	-	Aug 17 2018	Casc13-86_018	73.6252	0.325362	14.0246	2.00818	0.0912629	0.503657	2.20988	5.24623	1.77894	0.241291	100	0.8327
	-	Aug 17 2018	Casc13-86_033	73.7595	0.274373	14.1949	1.93129	0.115588	0.500303	2.25169	4.8975	1.93019	0.186894	100	0.2381
	-	Aug 17 2018	Casc13-86_025	73.7683	0.336701	14.0205	1.99408	0.132902	0.453881	2.1482	5.11973	1.84551	0.232686	100	0.4571
	-	Aug 17 2018	Casc13-86_036	73.8418	0.276131	14.0048	2.12586	0.116112	0.512661	2.39075	4.69077	1.85612	0.238957	100	-0.775
	-	Aug 17 2018	Casc13-86_039	73.8477	0.286018	13.9428	2.05696	0.103264	0.447823	2.21338	4.61429	2.26474	0.287792	100	0.899
	-	Aug 17 2018	Casc13-86_034	73.9138	0.356672	13.8596	1.98913	0.111729	0.455787	2.25371	4.95764	1.90972	0.247752	100	-0.13
	-	Aug 17 2018	Casc13-86_005	74.0945	0.26798	14.0009	2.01142	0.163797	0.461273	2.29503	4.7213	1.75688	0.292855	100	1.9936
	-	Aug 17 2018	Casc13-86_016	74.1226	0.32842	13.9833	1.84738	0.132557	0.441321	2.15935	4.95574	1.81194	0.280677	100	1.2747
	-	Aug 17 2018	Casc13-86_003	74.1779	0.293148	14.0002	1.94996	0.111566	0.438102	2.22544	4.68164	1.89752	0.289893	100	1.7823
	-	Aug 17 2018	Casc13-86_027	74.1975	0.379462	13.9812	2.07134	0.0676224	0.607436	2.31702	4.4166	1.79762	0.212042	100	0.1159
	-	Aug 17 2018	Casc13-86_009	74.2229	0.363738	13.9856	2.05681	0.0752706	0.471791	2.34099	4.33747	1.959	0.240593	100	-0.888
	-	Aug 17 2018	Casc13-86_008	74.234	0.296353	13.9345	1.96563	0.119704	0.420284	2.10292	4.93197	1.80694	0.242473	100	0.8107
	-	Aug 17 2018	Casc13-86_021	74.2355	0.349487	14.1022	1.91875	0.0854046	0.438221	2.2685	4.51929	1.90106	0.23445	100	0.8496
	-	Aug 17 2018	Casc13-86_040	74.2814	0.25455	13.9548	1.95218	0.101519	0.451112	2.20935	4.72873	1.88723	0.231382	100	0.5669
	-	Aug 17 2018	Casc13-86_024	74.2882	0.229827	13.7057	1.84065	0.102581	0.430799	2.03918	5.23328	1.92453	0.264962	100	0.0601
	-	Aug 17 2018	Casc13-86_001	74.3092	0.280257	13.6684	2.06839	0.102339	0.486548	2.29464	4.62908	1.90518	0.33052	100	5.2284
	-	Aug 17 2018	Casc13-86_035	74.3154	0.287323	13.8703	1.77963	0.108293	0.439946	2.1182	4.78608	2.09411	0.259222	100	1.0867
	-	Aug 17 2018	Casc13-86_006	74.3295	0.310172	13.6889	1.92241	0.11348	0.442483	2.1219	5.05257	1.82249	0.252734	100	-0.485
	-	Aug 17 2018	Casc13-86_028	74.3561	0.262366	14.0156	1.96999	0.127633	0.455409	2.14009	4.68421	1.81808	0.220586	100	-0.64
	-	Aug 17 2018	Casc13-86_026	74.5168	0.344187	13.9302	1.76904	0.115641	0.455799	2.12569	4.66698	1.91188	0.211459	100	0.2628
	-	Aug 17 2018	Casc13-86_011	74.5173	0.302925	13.8142	1.89031	0.119924	0.402092	2.06377	4.80062	1.94392	0.186983	100	-0.078
	-	Aug 17 2018	Casc13-86_031	74.5726	0.323013	13.747	1.98741	0.0940729	0.466229	2.1744	4.5465	1.89297	0.253355	100	-0.657
	-	Aug 17 2018	Casc13-86_013	74.5771	0.267846	14.0577	1.97761	0.0659357	0.43055	2.09524	4.3534	1.97929	0.252203	100	0.6168
	-	Aug 17 2018	Casc13-86_037	74.7586	0.301955	13.4878	1.84637	0.12183	0.407616	2.04886	4.81944	2.00484	0.261679	100	0.4733
	-	Aug 17 2018	Casc13-86_020	74.762	0.262246	13.7101	1.90833	0.0799301	0.427326	2.07826	4.63741	1.95111	0.236782	100	0.174
	-	Aug 17 2018	Casc13-86_030	74.7652	0.227534	13.6733	1.8167	0.0413397	0.40111	1.94857	5.07562	1.84275	0.268376	100	2.1038
	-	Aug 17 2018	Casc13-86_012	74.7654	0.27887	13.6638	1.80788	0.100547	0.384965	2.00747	4.79772	1.99341	0.258157	100	0.2928
	-	Aug 17 2018	Casc13-86_017	75.0449	0.237833	13.7592	1.78935	0.156939	0.396434	2.09316	4.44036	1.89063	0.246858	100	0.5209
	-	Aug 17 2018	Casc13-86_007	75.3244	0.253404	13.5843	1.75895	0.113376	0.374691	1.9377	4.56856	1.90285	0.234852	100	-0.243
	-	Aug 17 2018	Casc13-86_019	75.4438	0.228104	13.3395	1.73305	0.0580176	0.332957	1.86805	4.84872	1.93164	0.279237	100	-1.764
			Mean	74.1638	0.301365	13.915	1.96035	0.105234	0.458206	2.18344	4.80937	1.91229	0.246541	100	0.477372	36	Ruppert tephra correlative
			St. Dev.	0.630225	0.0463013	0.233967	0.148435	0.0247572	0.0632669	0.140946	0.260372	0.0932476	0.032288	0	1.2366
	-	Aug 17 2018	Casc13-86_004	71.0056	0.519497	15.1706	2.40551	0.117351	0.487706	1.61315	5.60534	2.90217	0.22362	100	-0.352
	-	Aug 17 2018	Casc13-86_032	78.9176	0.308055	13.7377	1.81801	0.0714077	0.34525	1.99565	0.705646	1.89309	0.268073	100	4.2834
REF	-	Aug 17 2018	UA 2557_001	73.548	0.373319	14.1367	2.02995	0.116949	0.506208	2.22494	4.87361	2.04749	0.184225	100	-0.123		Ruppert Lake, Alaska		Aug 17 2018	UA 2557_011	56.1778	0.215895	6.25834	2.08508	0	0.136251	1.95294	0.915951	2.00314	39.0712	100	96.6011	Low analytical total
Ruppert tephra	-	Aug 17 2018	UA 2557_003	73.5747	0.349114	14.184	2.09265	0.144946	0.488173	2.28264	4.83782	1.88242	0.211144	100	1.1448		Monteath et al. (2017)
	-	Aug 17 2018	UA 2557_005	73.7355	0.373111	14.1968	2.09053	0.0748068	0.484428	2.24448	4.75241	1.85466	0.249731	100	2.192
	-	Aug 17 2018	UA 2557_004	73.775	0.269204	13.9217	2.11445	0.0872047	0.464598	2.1954	5.06926	1.91919	0.237828	100	1.1418		Analysed concurrently with unknown sample
	-	Aug 17 2018	UA 2557_015	73.7782	0.310686	13.9827	2.02837	0.0662909	0.503801	2.32265	5.0256	1.78872	0.249299	100	0.7692
	-	Aug 17 2018	UA 2557_008	73.8199	0.292109	14.1929	2.16795	0.0844269	0.515832	2.24502	4.65779	1.85721	0.215787	100	-0.269
	-	Aug 17 2018	UA 2557_017	73.8543	0.242822	13.981	2.19685	0.118986	0.415789	2.28952	4.72967	2.01382	0.203141	100	0.2926
	-	Aug 17 2018	UA 2557_013	73.9205	0.293087	14.0903	1.98385	0.111368	0.498971	2.2176	4.71433	2.00032	0.219416	100	-1.317
	-	Aug 17 2018	UA 2557_016	73.9489	0.368393	13.7472	2.04241	0.1028	0.473894	2.23083	5.05398	1.84873	0.236169	100	0.014
	-	Aug 17 2018	UA 2557_019	74.1138	0.364026	13.8683	2.02705	0.0787513	0.455588	2.16443	4.82876	1.90931	0.245381	100	0.2366
	-	Aug 17 2018	UA 2557_014	74.1657	0.346335	13.9865	2.0026	0.089364	0.481844	2.17257	4.7974	1.83649	0.156411	100	0.3491
	-	Aug 17 2018	UA 2557_018	74.2652	0.292825	13.947	1.9909	0.107764	0.46359	2.25383	4.67276	1.84204	0.211937	100	2.1991
	-	Aug 17 2018	UA 2557_010	74.4998	0.298496	13.7336	1.90204	0.099523	0.402495	2.13546	4.80523	1.94222	0.234037	100	0.6421
	-	Aug 17 2018	UA 2557_007	74.522	0.258607	13.9928	1.91841	0.14269	0.435035	2.11498	4.59226	1.85682	0.214913	100	0.3413
	-	Aug 17 2018	UA 2557_020	74.5427	0.269834	13.9025	1.77734	0.102208	0.427723	2.05013	4.83206	1.93351	0.209263	100	0.6281
	-	Aug 17 2018	UA 2557_009	74.5499	0.210235	13.8747	1.88663	0.156858	0.358113	2.02204	4.65426	2.11902	0.217142	100	-0.477
	-	Aug 17 2018	UA 2557_002	74.8278	0.25141	13.6386	1.81492	0.0648707	0.406248	1.95591	4.77703	2.10825	0.200133	100	1.2913
			Mean	74.0848	0.303742	13.9634	2.00394	0.10293	0.457784	2.18367	4.80437	1.92707	0.217409	100	0.532706	17
			St. Dev.	0.388136	0.0508408	0.164258	0.115675	0.0271059	0.0439582	0.1004	0.139687	0.0985771	0.0241891	0	0.898839
	-	Aug 17 2018	UA 2557_006	70.897	0.446913	15.1323	2.42442	0.155438	0.503653	1.67514	5.61874	2.99569	0.194181	100	-1.013
	-	Aug 17 2018	UA 2557_012	75.2633	0.31499	13.6118	1.80986	0.0712604	0.373558	2.00662	4.35673	1.99075	0.259144	100	-0.892
	-	Aug 17 2018	UA 2557_006	73.3714	0.300185	14.2912	1.98525	0.038478	0.490038	2.29736	5.10824	1.93344	0.238146	100	0.6081
																			Aug 24 2018	Casc13-93-2	99.9105	0	0.000150538	0.0224604	0.0300257	0.00288345	0	0	0.0228464	0.0144799	100	1.0214	Biogenic silica
---	-	Aug 24 2018	Casc13-93-1	72.8108	0.405738	14.5375	1.91531	0.0584721	0.449197	1.59381	5.1258	2.96781	0.175085	100	1.62652		Sample processed but very little glass		Aug 24 2018	Casc13-93-3	99.6739	0.0121443	0.26627	0.0236975	0	0.00483864	0.0100063	0	0.00920296	0	100	1.5425	Biogenic silica
	-	Aug 24 2018	Casc13-93-6	75.9899	0.267559	13.3781	1.56066	0.0605743	0.291277	1.63859	4.73296	1.97576	0.135152	100	1.54239				Aug 24 2018	Casc13-93-4	99.6141	0	0	0.0310729	0.034045	0.00867526	0.0600859	0.145685	0	0.137384	100	0.775355	Biogenic silica
																			Aug 24 2018	Casc13-93-5	62.3824	0.507391	14.4205	8.77757	0.363489	0.233501	0.892069	7.98335	4.13613	0.392137	100	4.70411	Mineral contamination
CL-96	-	Aug 24 2018	Casc13-108-1	71.674	0.38133	14.7801	2.27567	0.0828497	0.707161	2.52211	4.71059	2.71878	0.190384	100	0.568113
	-	Aug 24 2018	Casc13-108-9	73.2235	0.370456	14.3334	2.066	0.073679	0.610228	2.28014	4.19326	2.66068	0.243588	100	1.35862
	-	Aug 24 2018	Casc13-108-8	73.46	0.450746	13.8675	1.92525	0.0719222	0.475729	2.08125	4.65706	2.82239	0.243068	100	0.22559
	-	Aug 24 2018	Casc13-108-7	73.5874	0.43531	13.9254	1.87029	0.0758995	0.528318	2.11367	4.47626	2.80027	0.241624	100	1.13773
	-	Aug 24 2018	Casc13-108-14	73.8407	0.378887	13.8081	1.9102	0.0856126	0.541416	2.07769	4.36884	2.78082	0.268359	100	2.35782
	-	Aug 24 2018	Casc13-108-4	74.3928	0.427675	13.4181	1.89912	0.0517148	0.451959	1.97619	4.41504	2.79818	0.218139	100	-0.648122
	-	Aug 24 2018	Casc13-108-13	74.4004	0.372068	13.585	1.82145	0.0519391	0.449211	1.99862	4.35265	2.79119	0.22926	100	2.97294
	-	Aug 24 2018	Casc13-108-3	74.6409	0.365533	13.5049	1.71537	0.0788567	0.438857	1.84581	4.36293	2.8769	0.220037	100	-0.456954
	-	Aug 24 2018	Casc13-108-16	74.6479	0.362229	13.4209	1.80309	0.077335	0.423271	2.03151	4.09666	2.94346	0.250106	100	2.38059
	-	Aug 24 2018	Casc13-108-11	74.7401	0.372462	13.3118	1.86488	0.0703135	0.426999	1.92611	4.31077	2.79927	0.229056	100	0.251048
	-	Aug 24 2018	Casc13-108-5	74.7403	0.432066	13.4141	1.83063	0.0931963	0.428594	2.02107	4.04283	2.81124	0.240581	100	0.00679342
	-	Aug 24 2018	Casc13-108-2	75.1402	0.391665	13.2433	1.75259	0.110218	0.442261	1.8894	3.92893	2.90064	0.259491	100	0.198236
			Mean	74.0407	0.395036	13.7177	1.89455	0.0769614	0.493667	2.06363	4.32632	2.80865	0.236141	100	0.862699	12	Unknown tephra
			St. Dev.	0.954483	0.0319233	0.457687	0.149961	0.0160336	0.088403	0.183779	0.233592	0.0755649	0.0206843	0	1.18241
	-	Aug 24 2018	Casc13-108-12	71.8204	0.385472	14.9996	2.41263	0.100735	0.420887	1.46604	4.9669	3.26932	0.203952	100	0.308281
	-	Aug 24 2018	Casc13-108-6	71.9329	0.668775	13.537	3.11778	0.0687357	0.448628	1.84065	4.57035	3.62103	0.250684	100	1.51551
	-	Aug 24 2018	Casc13-108-15	72.3571	0.440644	14.1528	2.1033	0.0606513	0.515459	2.00994	5.23834	2.92804	0.250033	100	2.81498
	-	Aug 24 2018	Casc13-108-10	78.3127	0.221964	11.6967	0.973962	0	0.121441	0.534893	4.11072	3.81684	0.272247	100	1.50808
CL-105	a	Aug 17 2018	Casc13-117_002	70.5853	0.51149	15.3401	2.41816	0.127923	0.528598	1.59628	5.74395	2.99556	0.19697	100	0.2304				Aug 17 2018	Casc13-117_013	99.8706	0.0354943	0.043245	0.017235	0.00162501	0.00773287	0.00281339	0.00296552	0	0.0243465	100	-1.23022	Biogenic silica
	a	Aug 17 2018	Casc13-117_006	70.8552	0.452963	15.1558	2.38188	0.138545	0.495603	1.65823	5.55481	3.13001	0.228618	100	0.0092				Aug 17 2018	Casc13-117_019	72.1556	0.415714	14.132	2.33393	0.0565437	0.380896	1.27873	5.20791	3.71877	0.413172	100	9.3002	Low analytical total
	a	Aug 17 2018	Casc13-117_011	70.9037	0.453903	15.177	2.41452	0.103241	0.550004	1.57489	5.86092	2.79466	0.215808	100	0.0957
	a	Aug 17 2018	Casc13-117_009	71.0098	0.519964	15.1921	2.29532	0.149697	0.54495	1.67873	5.56382	2.89376	0.195531	100	-0.616
	a	Aug 17 2018	Casc13-117_001	71.0121	0.462222	15.1509	2.35382	0.109092	0.552679	1.69605	5.49206	3.0412	0.167757	100	-0.042
	a	Aug 17 2018	Casc13-117_004	71.1002	0.444371	15.073	2.3958	0.121789	0.490625	1.60982	5.77039	2.8359	0.204074	100	0.8677
	a	Aug 17 2018	Casc13-117_007	71.1053	0.476944	14.9838	2.27395	0.126237	0.488424	1.69507	5.74343	2.95941	0.190412	100	0.2971
	a	Aug 17 2018	Casc13-117_016	71.2254	0.516962	15.5137	2.21927	0.118223	0.497534	1.61543	5.29076	2.87969	0.158899	100	3.0029
	a	Aug 17 2018	Casc13-117_003	71.2969	0.513066	15.2438	2.34905	0.153211	0.513194	1.62909	5.2227	2.93194	0.189913	100	0.682
	a	Aug 17 2018	Casc13-117_017	71.3858	0.477664	15.1984	2.39482	0.161389	0.568899	1.66652	5.2663	2.73957	0.18164	100	0.6518
	a	Aug 17 2018	Casc13-117_018	71.6647	0.478314	15.0221	2.2234	0.167457	0.521682	1.59962	5.34732	2.80365	0.222006	100	0.7521
			Mean	71.104	0.482533	15.1864	2.33818	0.134255	0.522927	1.63816	5.53241	2.90958	0.195602	100	0.539173	11	Aniakchak CFE II correlative
			St. Dev.	0.288816	0.0282718	0.147441	0.0736893	0.0213698	0.0282321	0.0425294	0.227232	0.116702	0.0215543	0	0.925201
	b	Aug 17 2018	Casc13-117_020	72.1348	0.429705	14.7491	2.12663	0.113175	0.404596	1.32098	4.88922	3.70622	0.162342	100	0.4541
	b	Aug 17 2018	Casc13-117_012	72.3396	0.484754	14.7487	2.22577	0.0754089	0.348632	1.37516	4.60428	3.65738	0.18137	100	0.1975
	b	Aug 17 2018	Casc13-117_014	71.6581	0.504631	14.7096	2.28361	0.0942034	0.393717	1.42055	5.12868	3.67045	0.176242	100	0.3231
	b	Aug 17 2018	Casc13-117_008	71.1001	0.638755	14.7731	2.62857	0.129536	0.474755	1.61033	4.78628	3.74034	0.152869	100	0.5081
			Mean	71.8081	0.514461	14.7451	2.31614	0.103081	0.405425	1.43175	4.85212	3.6936	0.168206	100	0.3707	4	Unsure if separate population or alkali loss from above
			St. Dev.	0.551659	0.0887159	0.0262627	0.218137	0.0234259	0.0521854	0.125818	0.2188	0.0373806	0.0130064	0	0.139162
	-	Aug 17 2018	Casc13-117_015	70.314	0.456096	15.34	2.29836	0.186122	0.524348	1.64022	6.09729	2.97827	0.213482	100	1.5074
	-	Aug 17 2018	Casc13-117_010	70.4807	0.523233	15.0947	2.36937	0.107114	0.530417	1.62349	6.2243	2.8885	0.20426	100	0.0377
	-	Aug 17 2018	Casc13-117_005	74.2589	0.25806	13.9569	1.49655	0.0523694	0.236342	0.699043	5.54215	3.30456	0.251982	100	0.0255
	-	Aug 17 2018	Casc13-117_021	69.7865	0.483987	14.9772	3.26326	0.1785	0.550421	1.91439	5.42332	3.29339	0.166384	100	1.7623
REF	a	Aug 17 2018	UA 1602_001	58.5999	1.39651	16.1799	8.1499	0.209062	3.18101	6.09126	4.59603	1.50634	0.116451	100	1.7346		Zagoskin Lake, St. Michael Island, Alaska		Aug 17 2018	UA 1602_019	69.8183	0.620418	15.0433	2.79597	0.136877	0.572286	1.67725	5.72882	3.13627	0.607631	100	22.3335	Low analytical total
Aniakchak CFE II	a	Aug 17 2018	UA 1602_005	59.2387	1.38971	16.563	7.39585	0.193549	3.04415	5.91668	4.55322	1.60363	0.131138	100	2.0217		Ager (2003); Davies et al. (2016)		Aug 17 2018	UA 1602_019	70.0423	0.615813	14.9316	2.77521	0.135862	0.568039	1.6648	5.6863	3.11299	0.603121	100	21.7527	Low analytical total
	a	Aug 17 2018	UA 1602_004	60.9927	1.5066	16.5603	6.15274	0.196721	2.54591	5.13646	5.00576	1.83724	0.0846306	100	1.9917
			Mean	59.6104	1.43094	16.4344	7.23283	0.199777	2.92369	5.7148	4.71834	1.64907	0.11074	100	1.916	3	Analysed concurrently with unknown sample
			St. Dev.	1.23896	0.0656102	0.220429	1.00851	0.00819589	0.334248	0.508404	0.249833	0.170067	0.023774	0	0.157812
	b	Aug 17 2018	UA 1602_003	70.6112	0.558656	15.0632	2.54692	0.165145	0.510476	1.67586	5.69459	3.02496	0.192368	100	0.1476
	b	Aug 17 2018	UA 1602_002	70.8169	0.490703	15.223	2.5446	0.134986	0.524744	1.70389	5.38126	3.03536	0.186638	100	0.2403
			Mean	70.714	0.524679	15.1431	2.54576	0.150066	0.51761	1.68988	5.53792	3.03016	0.189503	100	0.19395	2
			St. Dev.	0.145417	0.0480496	0.112959	0.00163665	0.0213252	0.0100886	0.0198208	0.221554	0.0073533	0.00405133	0	0.0655488
	a	Aug 17 2018	UA 1602_015	57.9213	1.47372	16.3299	8.53031	0.23977	3.11848	6.43286	4.37195	1.46091	0.156217	100	3.2105
	a	Aug 17 2018	UA 1602_011	58.0443	1.36066	16.5178	8.05139	0.236554	3.23411	6.51611	4.53381	1.40572	0.128629	100	2.9301
	a	Aug 17 2018	UA 1602_012	58.0955	1.35121	16.4306	7.9576	0.221637	3.10215	6.57836	4.69987	1.44892	0.147487	100	2.3568
	a	Aug 17 2018	UA 1602_006	58.1484	1.44742	16.4898	7.8848	0.232452	3.17915	6.26448	4.73038	1.52425	0.12773	100	5.6241
	a	Aug 17 2018	UA 1602_021	58.6634	1.34603	16.5285	7.77612	0.245727	3.10518	6.22468	4.48448	1.52877	0.12544	100	2.1137
	a	Aug 17 2018	UA 1602_016	58.7528	1.35991	16.6231	7.84988	0.237253	3.02515	6.12178	4.38123	1.53297	0.149681	100	3.2458
	a	Aug 17 2018	UA 1602_013	58.8383	1.4127	16.4797	7.65281	0.213354	3.13924	6.44113	4.22018	1.53896	0.0820108	100	1.8019
	a	Aug 17 2018	UA 1602_024	58.8484	1.24668	16.454	7.88376	0.214391	2.98858	6.22125	4.50403	1.53405	0.135504	100	2.0765
	a	Aug 17 2018	UA 1602_025	59.0283	1.44262	16.4874	7.24734	0.245596	3.07509	6.04202	4.75366	1.59234	0.110601	100	1.6086
	a	Aug 17 2018	UA 1602_018	59.3346	1.42011	16.714	7.42703	0.220921	2.80402	6.18425	4.32828	1.46218	0.135045	100	1.8602
	a	Aug 17 2018	UA 1602_020	59.5732	1.48948	16.3654	7.34632	0.225027	2.89644	6.04504	4.37284	1.60139	0.109423	100	1.8786
	a	Aug 17 2018	UA 1602_023	59.7936	1.38334	16.0695	7.23312	0.14695	2.827	5.79763	4.97963	1.66339	0.136667	100	0.9856
	a	Aug 17 2018	UA 1602_017	60.1294	1.41026	16.2608	6.64898	0.220433	2.76796	5.70401	5.13874	1.61996	0.128663	100	2.6847
	a	Aug 17 2018	UA 1602_009	61.2429	1.30676	16.5437	6.36323	0.265216	2.50199	5.25768	4.64873	1.77041	0.128291	100	0.9873
			Mean	59.0296	1.38935	16.4496	7.56091	0.226092	2.98318	6.13081	4.58199	1.54887	0.128671	100	2.38317	14
			St. Dev.	0.928559	0.0665162	0.158269	0.569809	0.0268908	0.200994	0.355706	0.26007	0.0957615	0.0187928	0	1.17202
	b	Aug 17 2018	UA 1602_022	70.6174	0.533289	15.2381	2.44634	0.114023	0.507705	1.60195	5.88166	2.91504	0.186725	100	1.0694
	b	Aug 17 2018	UA 1602_007	70.8192	0.500637	15.0272	2.45857	0.149341	0.535287	1.73958	5.52077	3.09359	0.201132	100	0.9848
	b	Aug 17 2018	UA 1602_014	70.8528	0.447279	15.2281	2.63169	0.158106	0.578024	1.71578	5.23203	2.98419	0.222053	100	1.363
			Mean	70.7631	0.493735	15.1644	2.5122	0.14049	0.540339	1.68577	5.54482	2.99761	0.203303	100	1.13907	3
			St. Dev.	0.127347	0.0434182	0.118964	0.103661	0.023336	0.0354307	0.0735582	0.32548	0.0900237	0.0177637	0	0.198492
	-	Aug 17 2018	UA 1602_010	64.6856	1.05954	15.3033	6.16574	0.253605	1.37349	3.55063	4.46512	3.0547	0.114135	100	0.9294
	-	Aug 17 2018	UA 1602_008	69.6226	0.592497	15.35	3.05994	0.177935	0.754542	2.2547	5.21659	2.8279	0.184486	100	-0.081
REF	b	Aug 10 2015	UA 1602-16	70.8333	0.468211	15.1505	2.57475	0.10167	0.475139	1.75151	5.40745	3.09136	0.188568	100	1.8392		Zagoskin Lake, St. Michael Island, Alaska
Aniakchak CFE II	b	Aug 10 2015	UA 1602-18	71.0586	0.507995	15.1861	2.53001	0.150304	0.547213	1.82695	5.1975	2.86543	0.167757	100	2.5974		Ager (2003); Davies et al. (2016)
	b	Aug 10 2015	UA 1602-13	71.1339	0.446635	15.1227	2.41953	0.170865	0.470287	1.69366	5.24197	3.15611	0.186259	100	1.9109
	b	Aug 10 2015	UA 1602-44	71.1549	0.499214	15.1489	2.64871	0.129734	0.528797	1.82552	4.99512	2.92502	0.186024	100	2.6469		Not analysed concurrently with unknown sample
	b	Aug 10 2015	UA 1602-40	71.1621	0.458565	15.1439	2.666	0.149144	0.484087	1.73522	4.94968	3.11595	0.174666	100	4.7899
	b	Aug 10 2015	UA 1602-31	71.2414	0.408833	15.0356	2.50225	0.169325	0.524782	1.74187	5.15903	3.09172	0.161504	100	5.3892		These additional points from Davies et al (2016) are plotted in Figure 3given the small number of rhyodactic analyses in this run
	b	Aug 10 2015	UA 1602-41	71.2989	0.513206	15.1377	2.48127	0.171634	0.494854	1.68452	4.88744	3.17163	0.205155	100	5.7298
	b	Aug 10 2015	UA 1602-24	71.3475	0.50564	15.1538	2.46283	0.119184	0.476211	1.62706	5.2006	2.94198	0.213144	100	4.8532
	b	Aug 10 2015	UA 1602-8	71.4385	0.521096	14.9723	2.38368	0.116084	0.528281	1.74804	5.05711	3.1156	0.153958	100	2.5708
	b	Aug 10 2015	UA 1602-6	71.5263	0.469583	15.0152	2.37394	0.160798	0.52144	1.69212	5.03935	3.06848	0.171354	100	2.424
	b	Aug 10 2015	UA 1602-36	71.5762	0.540884	14.9403	2.44826	0.118949	0.490386	1.67447	4.90906	3.15277	0.19189	100	1.9752
	b	Aug 10 2015	UA 1602-5	71.6499	0.377164	15.0187	2.60182	0.139831	0.482371	1.68023	4.74018	3.17142	0.178462	100	2.6683
	b	Aug 10 2015	UA 1602-42	71.6912	0.486228	15.001	2.53093	0.155597	0.414856	1.7703	4.77189	3.0319	0.188723	100	4.3041
	b	Sep 4 2015	UA 1602-1	69.2058	0.628905	15.7206	3.23493	0.148959	0.797382	2.64264	4.74273	2.72728	0.19477	100	1.1139
	b	Sep 4 2015	UA 1602-21	69.9217	0.534667	15.4737	3.13164	0.0960936	0.731938	2.19622	4.95569	2.83634	0.157614	100	1.6584
	b	Sep 4 2015	UA 1602-34	70.9951	0.498698	15.3866	2.56311	0.10984	0.469289	1.81574	4.82425	3.17519	0.209497	100	3.7694
	b	Sep 4 2015	UA 1602-25	71.0171	0.530775	15.2167	2.56657	0.241398	0.437535	1.68687	4.96929	3.16232	0.221483	100	0.5793
	b	Sep 4 2015	UA 1602-35	71.065	0.587332	15.209	2.69256	0.158692	0.552825	1.81187	4.7128	3.0529	0.202563	100	1.7591
	b	Sep 4 2015	UA 1602-30	71.1469	0.551813	14.9833	2.4765	0.176432	0.494729	1.70407	5.10321	3.18212	0.233622	100	5.4027
	b	Sep 4 2015	UA 1602-16	71.2023	0.525209	14.9907	2.571	0.125059	0.504212	1.78548	5.04579	3.05351	0.25389	100	1.8866
	b	Sep 4 2015	UA 1602-23	71.2995	0.510766	15.3261	2.46478	0.173723	0.493081	1.64111	4.93757	3.01643	0.176843	100	3.8698
	b	Sep 4 2015	UA 1602-7	71.38	0.538108	15.2316	2.42067	0.131935	0.424875	1.81904	4.69396	3.17945	0.232868	100	1.6182
	b	Sep 4 2015	UA 1602-24	71.3966	0.44913	15.043	2.51623	0.140257	0.451792	1.74369	4.98957	3.13592	0.172711	100	2.3222
	b	Sep 4 2015	UA 1602-28	71.408	0.398922	15.1964	2.47669	0.137841	0.417978	1.77288	4.85324	3.1718	0.214581	100	3.4398
	b	Sep 4 2015	UA 1602-33	71.461	0.53167	15.0851	2.5568	0.0923633	0.480996	1.7334	4.87497	3.03275	0.194821	100	0.9347
	b	Sep 4 2015	UA 1602-8	71.5357	0.561906	14.9933	2.48546	0.120285	0.444661	1.74551	4.91447	3.07037	0.165684	100	1.318
	b	Sep 4 2015	UA 1602-20	70.3029	0.459671	16.4382	2.04145	0.126461	0.402263	1.88812	5.46416	2.73106	0.188057	100	2.1039
			Mean	71.1278	0.500401	15.1971	2.54898	0.141943	0.501565	1.794	4.9866	3.05284	0.192091	100	2.79537	28
			StDev	0.541391	0.0565079	0.302281	0.219725	0.0314688	0.086045	0.200434	0.198544	0.133499	0.0249027	0	1.47339
---	-	Aug 24 2018	Casc13-119-1	76.231	0.190763	13.2845	1.55749	0.0479996	0.209318	1.65386	4.69158	1.99479	0.179067	100	2.17627		Sample processed but very little glass
	-	Aug 24 2018	Casc13-119-2	75.9623	0.254429	13.1586	1.58414	0.0609767	0.317176	1.62846	4.80078	2.0805	0.197149	100	2.40696
			Mean	76.0966	0.222596	13.2216	1.57081	0.0544881	0.263247	1.64116	4.74618	2.03764	0.188108	100	2.29161	2
			St. Dev.	0.19001	0.045019	0.0890139	0.0188475	0.00917618	0.0762671	0.017965	0.0772136	0.0606023	0.0127861	0	0.163119
---	-	Aug 17 2018	Casc13-131_001	75.1603	0.420046	13.1839	1.85822	0.0375935	0.39352	1.47198	4.55027	2.78251	0.18295	100	2.2598		Sample processed but very little glass
																			Oct 11 2018	Casc13-134/36-1	67.21	0.0710764	19.5777	0.0512821	0	0	0.489996	12.5209	0.0737733	0.00620198	100	-0.226	Mineral contamination
---	-	Aug 17 2018	Casc13-135_001	76.1896	0.224727	13.3687	1.42765	0.0774039	0.310872	1.55536	4.76427	1.95553	0.162393	100	3.9221		Sample processed twice - very little glass		Aug 17 2018	Casc13-135_002	99.8928	0.0308297	0.0134696	0.0106883	0.0163907	0.0201294	0	0	0.00789123	0.00906306	100	-0.782767	Biogenic silica
	-	Aug 17 2018	Casc13-135_004	77.2642	0.214833	12.6968	1.31358	0.0356848	0.23095	1.35076	4.75623	2.00177	0.174612	100	2.6532				Aug 17 2018	Casc13-135_003	99.8393	0.118975	0	0	0.0175544	0.0115108	0	0	0	0.0158669	100	-0.801148	Biogenic silica
																			Aug 17 2018	Casc13-145_002	68.2822	0	19.5808	0.0119315	0	0.00314273	0.0802788	11.9982	0.0227767	0.0266144	100	0.850488	Mineral contamination
---	-	Oct 11 2018	Casc13-144/46-1	76.4471	0.257078	13.2391	1.55851	0.00243562	0.328286	1.61753	4.48965	1.94209	0.152837	100	3.1046		Sample processed twice - very little glass		Aug 17 2018	Casc13-145_003	99.9203	0.0341415	0	0.0151289	0	0	0.00353425	0	0.0136749	0.0175617	100	-0.41738	Biogenic silica
	-	Aug 17 2018	Casc13-145_001	77.7406	0.277008	12.6119	1.36467	0.0857202	0.347816	1.92514	4.02482	1.4892	0.171932	100	0.9265				Oct 11 2018	Casc13-144/46-2	68.7471	0.00152897	19.3642	0.0242741	0.0316297	0	0.0119153	11.7753	0.0373566	0.00863463	100	0.7832	Mineral contamination
REF	-	Aug 17 2018	UA 2614_004	73.0033	0.183337	14.8312	1.79296	0.104026	0.559476	2.24968	4.34492	2.66414	0.344844	100	0.6084		Hayes River section		Aug 17 2018	UA 2614_008	54.4473	0	28.8909	0.403783	0.0267647	0.0315619	11.1515	4.90336	0.143878	0.00149246	100	0.566829	Mineral contamination
Hayes set H - unit F2	-	Aug 17 2018	UA 2614_001	73.2239	0.239439	14.5284	1.90387	0.0584955	0.487147	2.21538	4.51973	2.52467	0.386069	100	1.5771		Wallace et al. (2014); Davies et al. (2016)		Aug 17 2018	UA 2614_013	73.3326	0.17865	14.1735	1.81971	0.0693359	0.491606	2.06961	4.56941	2.62676	0.863608	100	20.0616	Low analytical total
	-	Aug 17 2018	UA 2614_009	73.3087	0.245188	14.8639	1.79217	0.110663	0.548744	2.17149	4.15985	2.52437	0.354962	100	1.8495				Aug 17 2018	UA 2614_002	73.5868	0.173486	14.5356	1.74806	0.107185	0.491591	2.14182	4.15954	2.65882	0.512871	100	7.8388	Low analytical total
	-	Aug 17 2018	UA 2614_007	73.7773	0.254703	14.2255	1.7372	0.100693	0.485254	2.14953	4.31018	2.64639	0.404447	100	1.4952		Analysed concurrently with unknown sample
	-	Aug 17 2018	UA 2614_005	74.3698	0.165122	14.37	1.55666	0.064765	0.485356	1.9739	4.13452	2.59565	0.367049	100	0.2826
			Mean	73.5366	0.217558	14.5638	1.75657	0.0877283	0.513195	2.152	4.29384	2.59104	0.371474	100	1.16256	5
			St. Dev.	0.544579	0.0404431	0.280552	0.127109	0.0241947	0.0375497	0.106846	0.155916	0.0657242	0.0239876	0	0.677459
	-	Aug 17 2018	UA 2614_012	71.6001	0.316663	15.0216	2.13844	0.0730988	0.674783	2.52971	4.62661	2.52605	0.636681	100	4.7836
	-	Aug 17 2018	UA 2614_006	72.2426	0.207774	14.551	1.63336	0.0625471	0.516455	2.1888	5.85267	2.45402	0.375259	100	-0.665
	-	Aug 17 2018	UA 2614_011	73.1019	0.265293	15.0623	1.75408	0.0706501	0.514644	2.55327	3.85649	2.56702	0.328494	100	4.6993
	-	Aug 17 2018	UA 2614_003	73.4541	0.258407	14.7753	1.92537	0.0378967	0.552296	2.36879	3.70351	2.62473	0.387099	100	5.5116
	-	Aug 17 2018	UA 2614_010	75.6923	0.126994	13.5177	1.35728	0.0850603	0.389332	1.80808	3.89103	2.87186	0.336198	100	1.5686

## Sheet: Table S3
Table S3: Secondary standard data (ID 3506 and Old Crow) for EPMA glass analyses of Cascade Lake samples and reference material.
Data provided here are single point analyses, averages (mean) and standard deviations.
ID 3506 data are shown without any corrections or normalisation. Old Crow data are normalised to 100% and are corrected values, if any corrections were applied to the run.
ID 3506 and Old Crow tephra were analysed at the start and end of each EPMA run, as well as in-between sets of >50 unknown analyses.
Single point data listed below bracketed the relevant unknown samples that were analysed on the given day - sample IDs are listed between the sets to show the run order.
Corrections, if applied, were calculated from a systematic difference between analysed values for Lipari or Old Crow across the run and the expected known values.
Rejected analyses are shown to the right - these are outside 2SD of their assayed values. This is often caused by accidentally analsying point that was used on a previous run and shows notable alkali loss.
Analytical conditions: 5 micron beam (exception: Nov 16th - 10 micron beam), 15 KeV and 6 nA current. St. Dev. = standard deviation.
Assayed values from Kuehn et al. (2011):
		SiO2	TiO2	Al2O3	FeOt	MnO	MgO	CaO	Na2O	K2O	Cl	Total	H2Od
	ID 3506	74.1	0.074	13.1	1.55	0.065	0.041	0.735	4.06	5.13	0.341	99.09	0.91
	Assayed	0.96	0.026	0.34	0.06	0.03	0.021	0.053	0.28	0.26	0.034
	Old Crow	75.1487	0.310419	13.138	1.70365	0.0543495	0.288471	1.48416	3.83582	3.72085	0.279064	100	4.12
	Assayed	1	0.049	0.34	0.14	0.029	0.027	0.05	0.26	0.26	0.047
																Rejected analyses
Date Analysed	SAMPLE	SiO2	TiO2	Al2O3	FeOt	MnO	MgO	CaO	Na2O	K2O	Cl	Total	H2Od	n	Analytical notes	SAMPLE	SiO2	TiO2	Al2O3	FeOt	MnO	MgO	CaO	Na2O	K2O	Cl	Total	H2Od
Feb 5 2018	ID 3506	73.8942	0.083238	13.0611	1.60726	0.0797874	0.0435549	0.720444	4.17663	5.10685	0.340391	99.0367	0.963269	13
Whole run averages	St. Dev.	0.788898	0.0266106	0.129495	0.0760347	0.022677	0.0154843	0.0213302	0.128437	0.0698483	0.0219244	0.849446	0.849446
	Old Crow	75.2475	0.324039	13.0408	1.73678	0.0534854	0.288632	1.43301	3.89648	3.76302	0.279227	100	3.77112	13
	St. Dev.	0.26569	0.0419193	0.0916091	0.0338914	0.0333092	0.0169461	0.0433248	0.19719	0.0964813	0.0255096	0	0.868583
Feb 5 2018	ID3506_016	75.6324	0.064377	13.1469	1.59758	0.059365	0.026642	0.714514	4.18887	5.16017	0.303536	100.826	-0.826		NaTDI file
Single point data bracketing unknowns	ID3506_017	75.2267	0.086883	13.3128	1.63512	0.057127	0.045516	0.684257	4.31574	5.03394	0.379245	100.692	-0.692		Na and K corrected down (from ID 3506)
	ID3506_018	74.3319	0.080664	12.9151	1.54353	0.125776	0.052771	0.748072	4.26441	5.11897	0.347412	99.4503	0.5497
	Mean	75.0637	0.077308	13.1249	1.59208	0.080756	0.041643	0.715614	4.25634	5.10436	0.343398	100.323	-0.322767	3
	St. Dev.	0.665402	0.0116223	0.199758	0.0460423	0.0390045	0.0134882	0.0319217	0.0638188	0.0643707	0.0380138	0.758543	0.758543
	OldCrow_016	75.3118	0.307205	12.9876	1.69619	0.044243	0.269026	1.37355	4.18256	3.60471	0.288116	100	3.37225
	OldCrow_017	75.5524	0.261733	13.1262	1.69379	0.0592539	0.282149	1.45107	3.66134	3.6645	0.319525	100	3.68741
	OldCrow_018	75.612	0.35471	12.8415	1.72616	0.00508488	0.299357	1.37097	3.80265	3.76346	0.289298	100	2.96724
	Mean	75.4921	0.307883	12.9851	1.70538	0.0361939	0.283511	1.39853	3.88218	3.67756	0.29898	100	3.3423	3
	St. Dev.	0.158932	0.0464922	0.142355	0.0180366	0.0279672	0.015211	0.0455175	0.269557	0.0801769	0.0178027	0	0.361018
															Unknown: Br60-61
	ID3506_019	73.7218	0.085007	12.8889	1.56505	0.070903	0.046331	0.728033	4.00353	5.11847	0.329638	98.4833	1.5167
	ID3506_020	74.3901	0.113823	13.106	1.58909	0.069255	0.02924	0.713035	4.21848	5.01395	0.320005	99.4907	0.5093
	ID3506_021	73.4799	0.037943	12.9994	1.62299	0.087328	0.043345	0.730595	4.10058	5.03967	0.344506	98.4085	1.5915
	ID3506_022	73.7353	0.109265	13.0859	1.60315	0.085447	0.046378	0.691784	4.17497	4.99989	0.350463	98.8035	1.1965
	Mean	73.8318	0.0865095	13.0201	1.59507	0.0782333	0.0413235	0.715862	4.12439	5.043	0.336153	98.7965	1.2035	4
	St. Dev.	0.390275	0.0347601	0.0989114	0.0243706	0.00947091	0.00817966	0.0178226	0.094137	0.0529439	0.0138775	0.493491	0.493491
	OldCrow_019	74.8243	0.342728	13.1639	1.71973	0.0503563	0.282751	1.48732	4.12851	3.77405	0.292288	100	3.96035
	OldCrow_020	74.7535	0.304674	13.1124	1.7817	0.0110521	0.299157	1.48384	4.25126	3.77811	0.289731	100	4.39821
	OldCrow_021	75.0615	0.385393	13.0931	1.76044	0.0675161	0.309225	1.4654	4.03992	3.5999	0.281153	100	4.38278
	OldCrow_022	75.1093	0.387905	13.1018	1.79285	0.102447	0.304201	1.48047	3.83229	3.68837	0.258773	100	4.22013
	Mean	74.9372	0.355175	13.1178	1.76368	0.057843	0.298833	1.47926	4.063	3.71011	0.280486	100	4.24037	4
	St. Dev.	0.174693	0.0395375	0.0317345	0.0322393	0.0379849	0.0114824	0.00965588	0.176536	0.0843216	0.0152388	0	0.203319
April 27 2018	ID 3506	74.1042	0.0740469	13.1435	1.53217	0.0628298	0.0412095	0.712517	4.06565	5.16497	0.332259	99.1583	0.84168	20	NaTDI file
Whole run averages	St. Dev.	0.291689	0.0358378	0.0746444	0.0719624	0.023121	0.0148212	0.0230373	0.169087	0.0875071	0.0284958	0.412203	0.412203		Na corrected down (to Old Crow)
	Old Crow	75.3361	0.306115	13.089	1.68393	0.0569852	0.288261	1.43014	3.83095	3.75813	0.284552	100	4.21082	20
	St. Dev.	0.232877	0.0381825	0.0903167	0.0583393	0.0211387	0.0160868	0.0373645	0.1716	0.0864563	0.0142955	0	0.861749
April 27 2018	ID 3506_024	74.1304	0.072957	13.1733	1.57214	0.060438	0.027444	0.708483	3.91696	5.19743	0.356666	99.1357	0.8643
Single point data bracketing unknowns	ID 3506_025	73.9311	0.053601	13.1429	1.52788	0.036806	0.067694	0.700476	4.13831	5.19142	0.347677	99.0594	0.9406
	ID 3506_026	73.8706	0.004466	13.0193	1.55084	0.074514	0.030406	0.753901	4.0211	5.26032	0.310229	98.8256	1.1744
	ID 3506_027	74.0016	0.080399	13.0543	1.53642	0.031129	0.0519	0.708325	3.84771	4.98489	0.341902	98.5615	1.4385
	ID 3506_028	73.6756	0.096735	13.1235	1.63051	0.042475	0.007849	0.736821	4.03701	5.037	0.362611	98.6683	1.3317
	Mean	73.9219	0.0616316	13.1027	1.56356	0.0490724	0.0370586	0.721601	3.99222	5.13421	0.343817	98.8501	1.1499	5
	St. Dev.	0.168229	0.0355145	0.0638967	0.0410102	0.017975	0.023177	0.0227461	0.112616	0.117175	0.0204024	0.246128	0.246128
	Old Crow_024	75.3851	0.346663	13.0699	1.66807	0.0378118	0.291454	1.46724	3.66455	3.82849	0.310792	100	3.84216
	Old Crow_025	75.7155	0.263461	13.0823	1.66953	0.0416652	0.298606	1.42397	3.65988	3.6444	0.25915	100	4.55823
	Old Crow_026	75.4466	0.33558	13.0996	1.65816	0.106851	0.313644	1.42321	3.56763	3.85052	0.255816	100	6.01224
	Old Crow_027	75.2678	0.403176	12.9502	1.68702	0.0563845	0.289469	1.48372	3.86583	3.78018	0.27916	100	3.70403
	Old Crow_028	74.9885	0.308987	13.1142	1.72761	0.0462428	0.294438	1.42377	4.08708	3.78879	0.284552	100	4.20998
	Mean	75.3607	0.331573	13.0632	1.68208	0.0577911	0.297522	1.44438	3.76899	3.77848	0.277894	100	4.46533	5
	St. Dev.	0.265051	0.0512837	0.0654004	0.0274925	0.0282907	0.00964724	0.0289824	0.208518	0.0802766	0.0221754	0	0.926645
															Unknowns: Casc13-49, -51, -55
	ID 3506_029	74.1312	0.126616	13.1679	1.58392	0.080729	0.037321	0.705083	4.20933	5.2098	0.359785	99.5305	0.4695
	ID 3506_030	74.1754	0.126595	13.2898	1.59534	0.084814	0.035333	0.702162	4.12659	5.16652	0.319342	99.5498	0.4502
	ID 3506_031	74.1854	0.055128	13.1063	1.60309	0.039802	0.048017	0.692826	3.89555	5.20337	0.356933	99.1059	0.8941
	ID 3506_032	74.2491	0.070036	13.1542	1.41475	0.089616	0.032362	0.708064	4.13811	5.23143	0.284951	99.3083	0.6917
	ID 3506_033	74.692	0.061066	13.1842	1.5406	0.083677	0.062821	0.747204	4.24025	5.12996	0.265441	99.9473	0.0527
	Mean	74.2866	0.0878882	13.1805	1.54754	0.0757276	0.0431708	0.711068	4.12197	5.18822	0.31729	99.4884	0.51164	5
	St. Dev.	0.230495	0.0357401	0.0676688	0.0780633	0.0203366	0.0124709	0.0209925	0.13525	0.0400857	0.0421774	0.314195	0.314195
	Old Crow_029	75.0378	0.261868	13.186	1.76553	0.0529491	0.288629	1.39547	3.96522	3.83054	0.278987	100	3.3563
	Old Crow_030	75.2795	0.337059	13.1194	1.75597	0.0578793	0.293663	1.42545	3.88408	3.63731	0.270798	100	3.71341
	Old Crow_031	75.1102	0.290438	13.2059	1.68404	0.0997812	0.265157	1.41105	4.00479	3.70717	0.286003	100	5.16855
	Old Crow_032	75.226	0.244513	13.2241	1.75213	0.0703681	0.273181	1.37789	3.70001	3.91178	0.284108	100	5.59932
																Old Crow_033	74.9452	0.382989	13.0331	1.67269	0.0798988	0.25822	1.44903	4.2335	3.70499	0.310395	100	3.19502
	Mean	75.1634	0.28347	13.1838	1.73942	0.0702445	0.280158	1.40247	3.88853	3.7717	0.279974	100	4.45939	4
	St. Dev.	0.109573	0.0404338	0.0456877	0.0373438	0.0210116	0.0132647	0.0204527	0.135348	0.122898	0.00679754	0	1.09173
May 23 2018	ID 3506	74.244	0.0857506	13.0829	1.52007	0.0547974	0.0416748	0.716039	4.08588	5.21397	0.32588	99.2974	0.702575	16	NaSiTDI file
Whole run averages	St. Dev.	0.424655	0.0317983	0.160904	0.0625943	0.017909	0.0140679	0.0179031	0.179221	0.0605885	0.014892	0.485662	0.485662		Na corrected down (to Old Crow)
	Old Crow	75.1997	0.322075	13.1071	1.68048	0.0536867	0.29749	1.47116	3.85003	3.79475	0.288685	100	4.67901	14
	St. Dev.	0.184967	0.0375151	0.142444	0.0457173	0.0215083	0.0185741	0.0284445	0.198367	0.0892097	0.0252798	0	1.6064
May 23 2018	ID 3506_001	74.2813	0.094454	13.1969	1.61545	0.050604	0.04553	0.732166	4.19646	5.29674	0.3477	99.7788	0.2212
Single point data bracketing unknowns	ID 3506_002	74.873	0.060401	13.328	1.48085	0.032635	0.011337	0.719803	3.81106	5.16562	0.301754	99.7163	0.2837
	ID 3506_003	73.8824	0.015487	12.9967	1.46633	0.063131	0.044415	0.709672	4.07386	5.25304	0.323903	98.7558	1.2442
	ID 3506_004	74.8549	0.086713	13.2063	1.4937	0.07779	0.047537	0.696687	4.19196	5.14539	0.335545	100.061	-0.061
	ID 3506_005	74.7311	0.113048	13.0579	1.45958	0.074946	0.037245	0.763419	4.34588	5.27732	0.336126	100.121	-0.121
	ID 3506_006	74.6948	0.077444	13.1815	1.46629	0.040669	0.061852	0.714025	3.86347	5.22008	0.335521	99.5799	0.4201
	Mean	74.5529	0.0745912	13.1612	1.49703	0.0566292	0.0413193	0.722629	4.08045	5.22637	0.330091	99.6688	0.3312	6
	St. Dev.	0.392147	0.0338325	0.117706	0.0593062	0.0183973	0.0167517	0.0231416	0.207866	0.0609049	0.0157924	0.492775	0.492775
	Old Crow_001	75.3908	0.359374	13.1576	1.71899	0.0610405	0.322076	1.44791	3.65069	3.69232	0.25736	100	3.53459
	Old Crow_002	75.3616	0.335697	12.8363	1.73868	0.0520304	0.314468	1.49875	3.78033	3.86289	0.283134	100	5.02855
	Old Crow_003	75.3095	0.298491	13.0375	1.67239	0.0718279	0.318009	1.42104	3.79875	3.81629	0.330813	100	3.53885
	Old Crow_004	75.28	0.344882	13.085	1.60962	0.0489819	0.296532	1.48283	3.74715	3.87079	0.302408	100	3.91751
	Old Crow_005	74.8281	0.313927	13.2177	1.63336	0.0277469	0.271782	1.48627	4.22189	3.79028	0.269702	100	2.8109
	Old Crow_006	75.2697	0.262639	13.1417	1.72476	0.0532378	0.304439	1.47344	3.6205	3.91091	0.3082	100	2.69323
	Mean	75.2399	0.319168	13.0793	1.68297	0.0524776	0.304551	1.46837	3.80322	3.82391	0.291936	100	3.58727	6
	St. Dev.	0.207097	0.0352177	0.134186	0.0531057	0.0146449	0.0185729	0.0287638	0.217081	0.0771894	0.0270294	0	0.847765
															Unknown: Casc13-60
	ID 3506_007	73.5226	0.059234	13.2319	1.49158	0.032729	0.055924	0.689242	4.18919	5.15785	0.32841	98.6845	1.3155
	ID 3506_008	74.2033	0.03579	13.278	1.43617	0.075987	0.031991	0.713693	3.99842	5.24992	0.33164	99.28	0.72
	ID 3506_009	73.8487	0.105581	12.9466	1.57623	0.055745	0.05051	0.724195	3.92616	5.30061	0.323918	98.7852	1.2148
	ID 3506_010	74.3348	0.092964	12.7892	1.46368	0.069057	0.051367	0.727326	3.87827	5.23491	0.311007	98.8824	1.1176
	ID 3506_011	73.5466	0.101961	12.9388	1.55178	0.021384	0.04624	0.720481	4.26508	5.2941	0.303102	98.7211	1.2789
	ID 3506_012	74.1682	0.143251	12.9163	1.49516	0.0403	0.055189	0.719356	3.98977	5.14924	0.347372	98.9457	1.0543
	Mean	73.9374	0.0897968	13.0168	1.50243	0.0492003	0.0485368	0.715716	4.04115	5.2311	0.324242	98.8832	1.11685	6
	St. Dev.	0.350585	0.0377235	0.193601	0.0528098	0.0213491	0.0088291	0.0137667	0.152498	0.0651705	0.0156797	0.217586	0.217586
	Old Crow_007	75.2574	0.254655	12.8363	1.74123	0.0674503	0.280437	1.52897	3.89492	3.90081	0.307101	100	7.25762
	Old Crow_008	75.3145	0.35693	13.2066	1.6253	0.0796053	0.306255	1.45054	3.50366	3.91509	0.312018	100	6.98736
	Old Crow_009	75.1874	0.318508	13.0999	1.65631	0.00502293	0.268816	1.50566	4.03711	3.69279	0.295125	100	7.30505
	Old Crow_010	75.1191	0.382956	13.0329	1.63763	0.0710723	0.321178	1.45959	3.93845	3.83967	0.255189	100	5.19653
	Old Crow_011	75.1358	0.290926	13.2197	1.71214	0.0676493	0.296527	1.44409	3.92907	3.6976	0.266626	100	5.06923
																Old Crow_012	74.6713	0.295586	13.0142	1.70049	0.0352238	0.317216	1.50765	4.47178	3.77365	0.274918	100	1.80798
	Mean	75.2028	0.320795	13.0791	1.67452	0.05816	0.294643	1.47777	3.86064	3.80919	0.287212	100	6.36316	5
	St. Dev.	0.082445	0.0510923	0.156165	0.0499533	0.0301104	0.0206842	0.0374324	0.206454	0.107864	0.0251137	0	1.1305
Aug 17 2018	ID 3506	74.8936	0.0714349	13.1876	1.53705	0.0711855	0.0356279	0.705958	4.08922	5.1658	0.330793	100.014	-0.0135368	19	NaSiTDI file
Whole run averages	St. Dev.	0.556561	0.0334584	0.0921212	0.0537763	0.0203142	0.0162761	0.0250234	0.168166	0.0812487	0.0230956	0.712868	0.712868		Si corrected down (to ID 3506)
	Old Crow	75.1728	0.306097	13.2445	1.69766	0.0630352	0.301288	1.45383	3.8097	3.72718	0.28922	100	5.05051	18
	St. Dev.	0.197854	0.0437183	0.134583	0.0424722	0.024362	0.0270425	0.0476744	0.116373	0.0989202	0.0191227	0	0.918827
Aug 17 2018	ID 3506_001	74.4205	0.08827	13.125	1.60238	0.066167	0.03522	0.703646	3.90662	5.12454	0.297895	99.303	0.697
Single point data bracketing unknowns	ID 3506_002	74.6876	0.057499	13.2212	1.57242	0.105084	0.043387	0.720604	4.03545	5.19055	0.332711	99.8914	0.1086
	ID 3506_003	74.0785	0.066434	13.2606	1.58853	0.079268	0.045412	0.70585	3.82767	5.16102	0.302624	99.0476	0.9524
	ID 3506_004	74.4032	0.122549	13.1228	1.53683	0.07858	0.045392	0.742687	3.79339	5.25872	0.360627	99.3835	0.6165
	ID 3506_005	75.2085	0.08703	13.3108	1.50752	0.065197	0.025227	0.692652	4.12258	5.23976	0.310524	100.5	-0.5
	Mean	74.5597	0.0843564	13.2081	1.56154	0.0788592	0.0389276	0.713088	3.93714	5.19492	0.320876	99.6251	0.3749	5
	St. Dev.	0.422114	0.0251181	0.0831517	0.0388699	0.0160914	0.00873463	0.0193117	0.139313	0.055233	0.025926	0.57706	0.57706
	Old Crow_001	75.1417	0.22868	13.4146	1.74193	0.0525864	0.331653	1.44192	3.701	3.70752	0.30788	100	6.12776
	Old Crow_002	75.0359	0.381892	13.4747	1.68593	0.0535433	0.287996	1.52681	3.62622	3.70677	0.284448	100	4.62854
	Old Crow_003	75.0016	0.259231	13.3352	1.65213	0.102391	0.313183	1.5292	3.72363	3.85024	0.301279	100	5.81734
	Old Crow_004	75.1993	0.387897	13.3654	1.71358	0.0455109	0.30687	1.4079	3.7912	3.56703	0.278055	100	4.7546
	Old Crow_005	75.2865	0.325647	13.098	1.65157	0.059504	0.329706	1.49535	3.76866	3.75188	0.301049	100	5.03165
	Mean	75.133	0.31667	13.3376	1.68903	0.0627072	0.313882	1.48024	3.72214	3.71669	0.294542	100	5.27198	5
	St. Dev.	0.116983	0.0715004	0.143949	0.0392931	0.0227334	0.0179299	0.053609	0.0643856	0.102049	0.0126426	0	0.665062
															Unknowns: Casc13-63, -73; Ref - Ruppert, CFE II
	ID 3506_006	75.1886	0.094591	13.1536	1.48653	0.096853	0.0664	0.71122	3.89905	5.25764	0.358777	100.232	-0.232
	ID 3506_007	75.2535	0.072548	13.2274	1.46231	0.030568	0.015148	0.684881	4.31598	5.13179	0.308713	100.433	-0.433
	ID 3506_008	75.3535	0	13.277	1.57895	0.046623	0.051533	0.728185	4.04887	5.24469	0.321137	100.578	-0.578
	ID 3506_009	75.8912	0.102427	13.1931	1.51478	0.108445	0.020263	0.715741	4.28804	5.23613	0.320715	101.318	-1.318
	ID 3506_010	75.5652	0.099531	13.3483	1.48024	0.067627	0.023287	0.693586	4.17614	5.10466	0.320296	100.807	-0.807
	Mean	75.4504	0.0738194	13.2399	1.50456	0.0700232	0.0353262	0.706723	4.14562	5.19498	0.325928	100.674	-0.6736	5
	St. Dev.	0.284685	0.0429006	0.0756987	0.0456616	0.0328104	0.0224011	0.0174056	0.17349	0.0711361	0.019087	0.416859	0.416859
	Old Crow_006	74.9733	0.281726	13.2488	1.72069	0.0690339	0.290436	1.48356	3.96165	3.73622	0.302893	100	2.99115
	Old Crow_007	75.0144	0.344133	13.2505	1.68519	0.0541174	0.313051	1.43307	3.81405	3.86213	0.296146	100	4.58706
	Old Crow_008	74.8626	0.30112	13.4514	1.68824	0.0669727	0.271807	1.41526	4.00153	3.72018	0.285218	100	3.8146
	Old Crow_009	74.8333	0.363018	13.2483	1.64254	0.0675134	0.361492	1.49593	3.7985	3.96412	0.290979	100	4.20566
	Old Crow_010	75.3083	0.268919	13.058	1.72436	0.0808119	0.306451	1.37027	3.91967	3.78163	0.234448	100	4.42368
	Mean	74.9984	0.311783	13.2514	1.6922	0.0676899	0.308648	1.43962	3.89908	3.81285	0.281937	100	4.00443	5
	St. Dev.	0.18884	0.0403919	0.139113	0.0330788	0.00947035	0.0335619	0.0513519	0.0896953	0.100928	0.0273348	0	0.636099
															Unknowns: Casc13-86, -117; Ref - CFE II
	ID 3506_011	75.3906	0.103225	13.1152	1.47111	0.056928	0	0.656131	4.16175	5.12136	0.330561	100.332	-0.332
	ID 3506_012	75.1207	0.104475	13.2276	1.59299	0.09237	0.019062	0.706828	4.36981	5.33091	0.348197	100.834	-0.834
	ID 3506_013	75.2736	0.054402	13.3174	1.47959	0.057226	0.059019	0.719472	4.27352	5.06534	0.334051	100.558	-0.558
	ID 3506_014	74.3488	0.073454	13.2334	1.56478	0.049111	0.041001	0.660805	4.2113	5.12387	0.38263	99.6027	0.3973
	ID 3506_015	75.3131	0.039661	13.1183	1.62866	0.068475	0.034974	0.72563	4.05705	5.1583	0.3463	100.412	-0.412
	Mean	75.0894	0.0750434	13.2024	1.54743	0.064822	0.0308112	0.693773	4.21469	5.15996	0.348348	100.348	-0.34774	5
	St. Dev.	0.425488	0.0289004	0.0858745	0.0696456	0.0168752	0.0223842	0.0329756	0.11746	0.101208	0.0206171	0.45829	0.45829
	Old Crow_011	75.5975	0.298966	12.9958	1.68169	0.072023	0.251669	1.38135	3.80278	3.6711	0.319096	100	5.22059
	Old Crow_012	75.3472	0.339098	13.1589	1.78484	0.0571677	0.318047	1.4006	3.76802	3.61056	0.278269	100	5.21043
																Old Crow_013	78.4962	0.260694	13.5483	1.75032	0.106246	0.328769	1.55483	0	4.17068	0.280543	100	9.08817
	Old Crow_014	75.2247	0.301985	13.1942	1.74761	0.0973139	0.273743	1.47183	3.70834	3.75999	0.284425	100	5.23965
	Old Crow_015	75.1496	0.267039	13.2383	1.72243	0.024875	0.280792	1.46669	3.8485	3.79012	0.27332	100	5.40307
	Mean	75.3298	0.301772	13.1468	1.73414	0.0628449	0.281063	1.43012	3.78191	3.70794	0.288777	100	5.26843	4
	St. Dev.	0.196225	0.0294819	0.105797	0.043356	0.0302561	0.0276012	0.0459214	0.0590879	0.0822679	0.0207164	0	0.0905721
															Unknowns: Casc13-131, -135, -145; Ref: Hayes F2
	ID 3506_016	74.0012	0.024984	13.0765	1.6009	0.06065	0.023946	0.756868	4.09525	5.09919	0.33747	99.0008	0.9992
	ID 3506_017	74.2771	0.098515	13.0826	1.49079	0.087554	0.042844	0.696999	3.9058	5.05094	0.293204	98.9602	1.0398
																ID 3506_018	75.8041	0.091195	13.1066	1.53705	0.126044	0.031612	0.726969	2.58931	5.09468	0.33425	99.3663
	ID 3506_019	74.8918	0.022067	13.1391	1.48486	0.07253	0.042867	0.682741	4.0277	5.21439	0.338538	99.8401	0.1599
	ID 3506_020	74.3115	0.045602	13.0141	1.55973	0.063269	0.041948	0.708679	4.17925	5.03638	0.340105	99.2239	0.7761
	Mean	74.3704	0.047792	13.0781	1.53407	0.0710008	0.0379012	0.711322	4.052	5.10023	0.327329	99.2563	0.74375	4
	St. Dev.	0.374317	0.0354006	0.0511201	0.0560341	0.0121555	0.00931334	0.0321634	0.115511	0.080705	0.0227759	0.406131	0.406131
	Old Crow_016	75.3495	0.305906	13.1295	1.74423	0.0895026	0.304634	1.50166	3.67181	3.67467	0.295199	100	6.73009
	Old Crow_017	75.4102	0.295122	13.2203	1.67129	0	0.289288	1.4297	3.8133	3.62792	0.313773	100	6.271
	Old Crow_018	75.242	0.262394	13.1643	1.62542	0.0732532	0.26928	1.44156	4.07393	3.6264	0.285866	100	4.65127
	Old Crow_019	75.1319	0.296968	13.3544	1.67429	0.0685124	0.323088	1.47623	3.78185	3.68086	0.273616	100	5.80099
																Old Crow_020	76.1268	0.366273	13.3223	1.61502	0.0482098	0.311505	1.4526	0	3.95794	0.255518	97.0494	8.01719
	Mean	75.2834	0.290097	13.2171	1.67881	0.057817	0.296573	1.46229	3.83522	3.65246	0.292114	100	5.86334	4
	St. Dev.	0.122613	0.01906	0.09885	0.0490129	0.0395788	0.0228475	0.0328456	0.170308	0.0293306	0.0169293	0	0.892646
Aug 24 2018	ID 3506	74.0385	0.0798411	13.1233	1.5381	0.0577017	0.0387922	0.71651	4.18232	5.10615	0.332553	99.1387	0.861279	19	NaTDI file
Whole run averages	St. Dev.	0.421274	0.0261361	0.0990217	0.0482472	0.0280959	0.0180441	0.0163199	0.185571	0.0587264	0.0169052	0.550324	0.550324		Na corrected down (from ID 3506)
	Old Crow	75.2992	0.298784	13.1689	1.66466	0.0583447	0.29462	1.45547	3.80896	3.73515	0.278842	100	4.46957	17
	St. Dev.	0.186098	0.0292691	0.0617242	0.0516441	0.0315936	0.024112	0.0437178	0.173857	0.114497	0.0178251	0	1.22602
Aug 24 2018	ID 3506-6	73.932	0.064254	13.139	1.54676	0.060579	0.046675	0.72653	4.14493	5.03906	0.331309	98.9563	1.0437
Single point data bracketing unknowns	ID 3506-7	73.8847	0.044665	12.9767	1.6023	0.067475	0.024811	0.724329	4.50903	5.10779	0.355875	99.2174	0.7826
	ID 3506-8	73.4565	0.087586	13.1234	1.48604	0.022424	0.012823	0.701497	4.19259	5.08694	0.334212	98.4286	1.5714
	ID 3506-9	73.7823	0.111143	13.1147	1.58225	0.036551	0.03251	0.715349	4.13086	5.12032	0.29986	98.8581	1.1419
	ID 3506-10	73.2347	0.078516	13.1142	1.4872	0.062112	0.033442	0.700849	4.02729	5.10238	0.335734	98.1007	1.8993
	Mean	73.658	0.0772328	13.0936	1.54091	0.0498282	0.0300522	0.713711	4.20094	5.0913	0.331398	98.7122	1.28778	5
	St. Dev.	0.300709	0.0249392	0.0661143	0.0534028	0.0193982	0.0124315	0.0121898	0.182477	0.0315629	0.0201277	0.444539	0.444539
	Old Crow-6	75.3973	0.285514	13.187	1.60601	0.0551066	0.282606	1.51806	3.68492	3.77877	0.264411	100	5.10036
	Old Crow-7	75.2565	0.28212	13.2271	1.69075	0.0187211	0.334002	1.48048	3.82791	3.66271	0.283663	100	6.0954
	Old Crow-8	75.0839	0.257033	13.206	1.66813	0.145077	0.324223	1.43676	3.90887	3.76244	0.268041	100	5.60696
																Old Crow-9	74.1711	0.355276	13.0923	1.61437	0.0434527	0.171653	1.31445	4.87439	4.1459	0.280537	100	5.4581
	Old Crow-10	75.5553	0.307028	13.1181	1.67311	0.0295087	0.253857	1.45985	3.64927	3.74422	0.270921	100	7.89486
	Mean	75.3233	0.282924	13.1845	1.6595	0.0621035	0.298672	1.47379	3.76774	3.73703	0.271759	100	6.1744	4
	St. Dev.	0.200884	0.0204836	0.0472597	0.0369553	0.057382	0.0372719	0.0344956	0.121698	0.0515221	0.0083713	0	1.2168
															Unknowns: Casc13-93, -108, -119
	ID 3506-11	73.5257	0.108826	12.9206	1.53961	0.099599	0.065419	0.684118	4.27999	5.13695	0.316767	98.606	1.394
	ID 3506-13	73.9161	0.08366	13.0813	1.5216	0.057624	0.042683	0.71842	4.3167	5.09331	0.36195	99.1116	0.8884
	ID 3506-14	73.5336	0.073287	13.0541	1.56782	0.044998	0.013872	0.707307	3.80283	5.09704	0.324541	98.1462	1.8538
	ID 3506-15	73.6969	0.074863	13.1003	1.63442	0.088489	0.059694	0.735014	4.15041	5.10512	0.346445	98.9135	1.0865
	Mean	73.6681	0.085159	13.0391	1.56586	0.0726775	0.045417	0.711215	4.13748	5.10811	0.337426	98.6943	1.30568	4
	St. Dev.	0.183213	0.0164248	0.0812271	0.0495053	0.0256095	0.0231407	0.0213528	0.234227	0.0198517	0.0206203	0.420475	0.420475
	Old Crow-11	75.4083	0.318714	13.0889	1.67997	0.0451092	0.324357	1.50744	3.71636	3.72187	0.244147	100	4.00858
																Old Crow-12	78.2261	0.293047	13.3751	1.73828	0.0776555	0.278252	1.57055	1.12076	3.09624	0.28923	100	6.1457
	Old Crow-13	75.2708	0.337501	13.2588	1.68013	0.0161636	0.280778	1.49628	3.72191	3.70525	0.300148	100	3.70977
	Old Crow-14	75.2324	0.330944	13.0988	1.58689	0.0223095	0.301211	1.48164	3.98666	3.74246	0.279865	100	3.04585
																Old Crow-15	75.1136	0.259578	12.8555	1.83388	0.0387456	0.330176	1.46536	4.0021	3.85966	0.311696	100	12.9889
	Mean	75.3038	0.329053	13.1488	1.649	0.0278608	0.302116	1.49512	3.80831	3.72319	0.27472	100	3.58807	3
	St. Dev.	0.0925035	0.00953503	0.0953605	0.053784	0.0152504	0.0218035	0.0129382	0.15448	0.0186418	0.0283528	0	0.492768
Oct 11 2018	ID 3506	74.0008	0.0897771	13.0628	1.56025	0.0683225	0.0433922	0.717622	4.1236	5.18929	0.336477	99.1164	0.883611	18	NaTDI file
Whole run averages	St. Dev.	0.296054	0.0244276	0.0752784	0.0410874	0.0259544	0.0131836	0.0191169	0.148995	0.0831662	0.0177138	0.411368	0.411368		No correction applied
	Old Crow	75.263	0.313155	13.1	1.67348	0.0573058	0.293798	1.43934	3.87679	3.76805	0.277856	100	4.45257	19
	St. Dev.	0.205405	0.0227617	0.0877626	0.0615518	0.0256776	0.022036	0.0412129	0.155517	0.100284	0.0289682	0	1.06091
Oct 11th 2018	ID 3506_001	74.2147	0.133628	13.1131	1.58058	0.045743	0.033537	0.690712	3.98086	5.27789	0.339769	99.3338	0.6662
Single point data bracketing unknowns	ID 3506_002	73.4306	0.078949	13.0352	1.52473	0.092649	0.024399	0.718616	4.01225	5.28262	0.287051	98.4222	1.5778
	ID 3506_003	73.6374	0.059213	13.139	1.47682	0.053075	0.056919	0.72215	4.1341	5.15475	0.342827	98.6988	1.3012
																ID 3506_004	72.4497	0.083463	12.9128	1.54702	0.039553	0.023422	0.719265	4.29202	5.06835	0.328732	97.3902
																ID 3506_005	72.724	0.025785	12.9306	1.50472	0.073611	0.037633	0.7015	4.24574	5.22307	0.350099	97.7378
	Mean	73.7609	0.0905967	13.0958	1.52738	0.0638223	0.038285	0.710493	4.0424	5.23842	0.323216	98.8183	1.18173	3
	St. Dev.	0.406377	0.0385506	0.0540272	0.0519306	0.0252324	0.0167719	0.0172215	0.0809478	0.0724989	0.0313568	0.467395	0.467395
	Old Crow_001	75.2198	0.299417	13.363	1.60817	0.0623434	0.31865	1.43396	3.67858	3.76856	0.319714	100	4.3764
	Old Crow_002	75.3627	0.355686	13.0932	1.68363	0	0.276913	1.42324	3.86531	3.70189	0.306762	100	6.0214
	Old Crow_003	74.9541	0.308198	13.0457	1.61399	0.0306675	0.282731	1.47293	4.14753	3.91863	0.291073	100	5.4243
																Old Crow_004	75.0509	0.275257	12.9725	1.55509	0.0583654	0.287728	1.42926	4.3614	3.83126	0.230069	100	3.5918
	Old Crow_005	75.0086	0.264091	13.0862	1.67475	0.0319081	0.287855	1.46564	4.09776	3.90786	0.226388	100	4.2282
	Mean	75.1363	0.306848	13.147	1.64513	0.0312298	0.291537	1.44894	3.9473	3.82423	0.285984	100	5.01258	4
	St. Dev.	0.189486	0.0377287	0.145497	0.039562	0.0254567	0.0186198	0.0240783	0.217307	0.106416	0.0414207	0	0.857751
															Unknowns: Casc13-12, -14; Ref - Novarupta Katmai 1912, Redoubt 1989-90
	ID 3506_006	73.776	0.141118	13.1466	1.5736	0.077448	0.041965	0.708688	4.3569	5.35554	0.333047	99.4358	0.5642
	ID 3506_007	74.0051	0.092459	12.992	1.58184	0.087745	0.0194	0.743016	4.14201	5.14198	0.321325	99.0544	0.9456
	ID 3506_008	73.9618	0.077206	13.0604	1.57449	0.118968	0.041724	0.706336	3.83346	5.11582	0.344073	98.7567	1.2433
	ID 3506_009	73.8956	0.092218	13.1424	1.54292	0.067983	0.030536	0.685661	4.1438	5.19176	0.324291	99.044	0.956
	ID 3506_010	73.9905	0.098131	13.1182	1.47573	0.041577	0.05385	0.705002	4.1923	5.07446	0.344614	99.0166	0.9834
	Mean	73.9258	0.100226	13.0919	1.54972	0.0787442	0.037495	0.709741	4.13369	5.17591	0.33347	99.0615	0.9385	5
	St. Dev.	0.0937052	0.0241398	0.0655864	0.043978	0.0282748	0.01305	0.0207499	0.189451	0.109055	0.010823	0.242578	0.242578
	Old Crow_006	75.2422	0.341502	13.1145	1.72169	0.0479789	0.283218	1.41297	3.76743	3.88935	0.231425	100	5.1188
	Old Crow_007	75.2708	0.316888	13.1589	1.62533	0.0575561	0.302362	1.49909	3.76847	3.80362	0.254358	100	5.9022
	Old Crow_008	75.2353	0.324997	13.105	1.61094	0.0463947	0.281339	1.49747	3.75392	3.919	0.291401	100	5.0667
	Old Crow_009	75.3666	0.312165	13.0805	1.58421	0.0422498	0.318766	1.42526	3.9649	3.68868	0.279764	100	4.1179
	Old Crow_010	75.5287	0.311173	13.0363	1.67767	0.0672888	0.270617	1.41251	3.76417	3.71142	0.284317	100	4.3555
	Mean	75.3287	0.321345	13.099	1.64397	0.0522937	0.29126	1.44946	3.80378	3.80241	0.268253	100	4.91222	5
	St. Dev.	0.123454	0.0125224	0.0450895	0.0551955	0.0100851	0.0191645	0.044863	0.090254	0.102918	0.0248787	0	0.70489
															Unknowns: Casc13-16, -19, -21, -24, -27
	ID 3506_011	74.1274	0.089819	12.8739	1.56026	0.038289	0.040096	0.753373	4.06155	5.2131	0.340509	99.0214	0.9786
	ID 3506_012	74.2172	0.0898	13.0035	1.61477	0.04419	0.059659	0.725484	4.12262	5.21956	0.355901	99.3724	0.6276
	ID 3506_013	73.6218	0.092849	13.0005	1.60175	0.067824	0.022602	0.720869	3.87457	5.19874	0.338937	98.4639	1.5361
	ID 3506_014	74.2367	0.047192	13.0544	1.54611	0.024579	0.038085	0.729198	4.3053	5.18064	0.319693	99.4098	0.5902
	ID 3506_015	73.5696	0.059348	12.9802	1.51394	0.09592	0.049419	0.716324	4.30188	5.12814	0.331159	98.6713	1.3287
	Mean	73.9545	0.0758016	12.9825	1.56737	0.0541604	0.0419722	0.72905	4.13318	5.18804	0.33724	98.9878	1.01224	5
	St. Dev.	0.330673	0.0210493	0.0665843	0.0411887	0.0280933	0.0138032	0.0144328	0.180421	0.0366701	0.0132917	0.41886	0.41886
	Old Crow_011	75.3315	0.331391	13.0337	1.73005	0.0686447	0.3131	1.43293	3.66446	3.85138	0.313674	100	3.6269
	Old Crow_012	75.6324	0.275066	13.1115	1.67467	0.0724777	0.289735	1.39049	3.71126	3.64164	0.259432	100	5.4964
	Old Crow_013	75.0005	0.290454	13.2386	1.70722	0.103137	0.336359	1.4665	3.80482	3.84205	0.271774	100	4.8216
	Old Crow_014	75.4114	0.310178	13.0867	1.61228	0.06835	0.297267	1.37803	3.99402	3.62676	0.277729	100	4.101
	Old Crow_015	75.535	0.284084	13.0258	1.67151	0.0478118	0.322985	1.35391	3.87782	3.70759	0.223988	100	3.9777
	Mean	75.3822	0.298235	13.0993	1.67914	0.0720842	0.311889	1.40437	3.81048	3.73388	0.269319	100	4.40472	5
	St. Dev.	0.24239	0.022581	0.0857524	0.0445206	0.0198705	0.0188943	0.0450217	0.131742	0.107447	0.0323912	0	0.749191
															Unknowns: Casc13-33, -36, -43, -144/146
	ID 3506_016	74.4425	0.073006	13.1651	1.55627	0.04482	0.061763	0.731132	4.20397	5.16753	0.364598	99.7284	0.2716
	ID 3506_017	74.1955	0.092807	13.0181	1.57089	0.064415	0.046325	0.71956	4.06248	5.33008	0.332966	99.358	0.642
	ID 3506_018	74.3081	0.07759	13.0909	1.60825	0.075981	0.057766	0.732839	4.34277	5.21549	0.347691	99.7789	0.2211
	ID 3506_019	74.3859	0.121738	13.1033	1.6055	0.08332	0.052555	0.728265	4.13691	5.10107	0.360987	99.598	0.402
	ID 3506_020	73.9982	0.098917	13.0932	1.57614	0.105279	0.05046	0.679979	4.01702	5.0581	0.32714	98.9306	1.0694
	Mean	74.266	0.0928116	13.0941	1.58341	0.074763	0.0537738	0.718355	4.15263	5.17445	0.346676	99.4788	0.52122	5
	St. Dev.	0.176059	0.0193518	0.0522319	0.022645	0.0224143	0.00607693	0.0220534	0.128017	0.105918	0.0165579	0.347018	0.347018
	Old Crow_016	75.2983	0.329283	13.1546	1.70907	0.0823093	0.301852	1.45172	3.71105	3.72587	0.30481	100	3.8808
																Old Crow_017	75.0495	0.268484	12.9825	1.74851	0.0577009	0.31932	1.39107	4.32112	3.65548	0.266412	100	4.2251
	Old Crow_018	74.9071	0.32223	12.9747	1.84868	0.0189026	0.29507	1.47237	4.10688	3.82134	0.300643	100	1.2939
	Old Crow_019	75.0784	0.318357	13.0721	1.72932	0.0764443	0.265169	1.50263	4.00363	3.73837	0.278337	100	3.8987
	Old Crow_020	75.178	0.329102	13.1133	1.65583	0.0699788	0.291527	1.41872	4.01754	3.72431	0.260416	100	3.7794
	Old Crow_021	75.4355	0.325688	13.0047	1.6572	0.094366	0.246649	1.43702	3.95945	3.60458	0.303261	100	5.111
	Mean	75.1795	0.324932	13.0639	1.72002	0.0684002	0.280054	1.45649	3.95971	3.72289	0.289493	100	3.59276	5
	St. Dev.	0.202524	0.00467502	0.074506	0.0787824	0.02909	0.0232901	0.0324425	0.148967	0.0773643	0.0194834	0	1.39653
Nov 16 2018	ID 3506	73.7986	0.072413	13.0694	1.56716	0.0652794	0.0452692	0.717416	3.91891	5.17017	0.330358	98.6977	1.30232	27	No TDI applied (10 micron analyses)
Whole run averages	St. Dev.	0.496097	0.0322447	0.123446	0.0554682	0.0257226	0.0134499	0.0269605	0.109674	0.114668	0.0173698	0.605476	0.605476		Na corrected up and K corrected down (from ID 3506)
	Old Crow	75.2915	0.316823	13.1645	1.68602	0.0503488	0.299253	1.46406	3.74189	3.76949	0.279166	100	5.17567	18
	St. Dev.	0.23588	0.0449444	0.114609	0.0542336	0.0272106	0.0252207	0.0342419	0.16997	0.0829703	0.0212792	0	1.27688
Nov 16 2018	ID3506_014	73.004	0.033591	13.0362	1.56568	0.049774	0.030577	0.673835	3.90906	5.31189	0.348529	97.8845	2.1155
Single point data bracketing unknowns	ID3506_015	73.2095	0.080598	13.0199	1.60914	0.073251	0.035708	0.693809	4.00774	5.05204	0.320583	98.0298	1.9702
	ID3506_016	72.9671	0.118667	12.7902	1.56893	0.101191	0.056124	0.75797	3.99347	5.0125	0.345282	97.6335	2.3665
	Mean	73.0602	0.0776187	12.9488	1.58125	0.0747387	0.040803	0.708538	3.97009	5.12548	0.338131	97.8493	2.15073	3
	St. Dev.	0.130607	0.0426162	0.137564	0.0242081	0.0257408	0.0135141	0.0439589	0.053333	0.162645	0.0152838	0.200486	0.200486
	Old Crow_014	75.6569	0.338058	13.2179	1.61276	0.0808575	0.295903	1.44651	3.442	3.68978	0.283324	100	5.28157
	Old Crow_015	74.644	0.321927	13.1013	1.77153	0.0621788	0.338731	1.4668	4.19505	3.89241	0.266289	100	8.23397
																Old Crow_016	74.9097	0.307913	13.1289	1.64468	0.0582979	0.320151	1.44225	4.38854	3.58921	0.271636	100	3.30521
	Mean	75.1504	0.329993	13.1596	1.69214	0.0715182	0.317317	1.45665	3.81852	3.7911	0.274807	100	6.75777	2
	St. Dev.	0.716237	0.0114059	0.0824914	0.112266	0.0132079	0.0302837	0.0143451	0.532489	0.14328	0.0120454	0	2.08766
															Ref: Opala
	ID3506_017	73.7905	0.074463	12.9621	1.61772	0.015107	0.048085	0.771239	3.84395	5.1021	0.319169	98.4725	1.5275
	ID3506_018	74.5644	0.047384	13.316	1.50852	0.092997	0.037852	0.671269	4.01045	5.18834	0.325991	99.6896	0.3104
	ID3506_019	73.8797	0.133106	13.1986	1.62635	0.104561	0.049146	0.711391	3.91612	5.09223	0.337276	98.9724	1.0276
	ID3506_020	74.4228	0.108315	13.229	1.65053	0.03588	0.053235	0.692728	3.95717	5.17792	0.31242	99.5695	0.4305
		74.1643	0.090817	13.1764	1.60078	0.0621362	0.0470795	0.711657	3.93192	5.14015	0.323714	99.176	0.824	4
		0.386275	0.0376316	0.151297	0.0630549	0.0434104	0.00654009	0.0429712	0.0702208	0.0499766	0.0106038	0.564208	0.564208
	Old Crow_017	75.3805	0.255732	13.2114	1.69509	0.0334567	0.291632	1.4562	3.71644	3.74746	0.273794	100	4.70059
																Old Crow_018	77.0145	0.272138	13.4826	1.72373	0.0178933	0.144403	1.49648	1.90517	3.73125	0.273779	100	6.2441
																Old Crow_019	75.5209	0.361308	13.2017	1.71023	0.0736122	0.259177	1.43655	3.38851	3.81546	0.300257	100	6.32128
	Old Crow_020	75.1056	0.284346	13.1752	1.73642	0.0353225	0.301959	1.47093	3.90427	3.77196	0.276535	100	2.38529
	Mean	75.2431	0.270039	13.1933	1.71575	0.0343896	0.296796	1.46356	3.81035	3.75971	0.275165	100	3.54294	2
	St. Dev.	0.194412	0.0202336	0.0256311	0.0292244	0.00131938	0.0073017	0.0104128	0.132812	0.0173263	0.00193836	0	1.63716
Aug 22 2019	ID 3506	73.9609	0.0713502	13.1484	1.55665	0.0692745	0.0433339	0.72173	4.09619	5.13715	0.329729	99.0602	0.939758	19	NaTDI file
Whole run averages	St. Dev.	0.35144	0.0258571	0.0819656	0.0394311	0.018318	0.0167382	0.0225619	0.200217	0.0923724	0.0221204	0.37972	0.37972		No corrections
	Old Crow	75.164	0.310726	13.1296	1.71179	0.0649664	0.295532	1.45548	3.94061	3.70902	0.281932	100	3.35629	18
	St. Dev.	0.279049	0.0274733	0.068642	0.0518304	0.0260657	0.0277696	0.0319655	0.234283	0.067339	0.0190666	0	1.20951
Aug 22 2019	ID3506_010	74.5931	0.048466	13.4484	1.49612	0.0795964	0.0488496	0.756808	4.0568	5.21233	0.335194	100	1.2091
Single point data bracketing unknowns	ID3506_011	74.6057	0.0621852	13.2724	1.63855	0.0247977	0.0337034	0.7409	4.24024	5.12982	0.325227	100	1.3335
	ID3506_012	74.4133	0.0871973	13.3323	1.53867	0.0888975	0.0415073	0.725313	4.29344	5.21075	0.346885	100	0.4224
	ID3506_013	74.6802	0.0527478	13.2676	1.53277	0.0803618	0.0668843	0.713774	4.13078	5.20102	0.353751	100	0.6195
	Mean	74.5731	0.0626491	13.3302	1.55153	0.0684134	0.0477362	0.734199	4.18032	5.18848	0.340264	100	0.896125
	St. Dev.	0.11324	0.01734	0.0841403	0.0609926	0.0293811	0.0141846	0.0187279	0.10661	0.0394276	0.0126171	0	0.443541
	OldCrow_010	75.289	0.299604	13.1427	1.69937	0.0563677	0.284951	1.44843	3.92463	3.64224	0.274737	100	4.5623
	OldCrow_011	74.9475	0.322533	13.0761	1.73847	0.0385467	0.273469	1.45483	4.20619	3.73134	0.272565	100	4.3808
	OldCrow_012	75.3642	0.372886	13.1069	1.68692	0.10116	0.330139	1.48009	3.63256	3.71358	0.273189	100	4.0209
	OldCrow_013	75.3626	0.319072	13.1304	1.77462	0.0428151	0.29444	1.4301	3.75872	3.66975	0.280939	100	4.2628
	Mean	75.2408	0.328524	13.114	1.72484	0.0597222	0.29575	1.45337	3.88053	3.68923	0.275357	100	4.3067
	St. Dev.	0.198667	0.0312497	0.029312	0.0397924	0.0286505	0.0244768	0.0206723	0.247877	0.0406355	0.00383149	0	0.226885
															Ref: WRAn (UT1480, UT1482)
	ID3506_014	74.3289	0.0787366	13.1225	1.52052	0.0972581	0.0447099	0.72519	4.43374	5.38167	0.344543	100	0.9101
	ID3506_015	74.8308	0.0756816	13.2842	1.51354	0.0539361	0.0505831	0.716434	3.94033	5.27347	0.337082	100	0.8345
	ID3506_016	74.7524	0.0716693	13.4039	1.57475	0.0592385	0.0346482	0.745126	3.86243	5.2235	0.351691	100	1.559
	ID3506_017	74.6379	0.0526056	13.2166	1.54155	0.0714942	0.0110778	0.751859	4.26266	5.18825	0.343665	100	0.1247
	ID3506_018	74.2117	0.0819432	13.3138	1.59864	0.0800831	0.0244592	0.738254	4.50865	5.20173	0.310908	100	1.0803
	ID3506_019	74.4318	0.0502717	13.3292	1.65909	0.0857589	0.0388208	0.678923	4.26367	5.2003	0.338582	100	1.4575
	Mean	74.5322	0.0684847	13.2784	1.56802	0.0746282	0.0340498	0.725964	4.21191	5.24482	0.337745	100	0.99435
	St. Dev.	0.246138	0.013653	0.0976992	0.0551395	0.0163743	0.0143513	0.026431	0.260158	0.0735401	0.0141217	0	0.515687
	OldCrow_014	75.2983	0.336919	13.1916	1.68225	0.0554131	0.266374	1.48914	3.834	3.61778	0.294702	100	4.2104
	OldCrow_015	74.904	0.306178	13.177	1.78757	0.133613	0.317423	1.45812	3.88895	3.80952	0.28105	100	4.9063
	OldCrow_016	75.546	0.307605	12.9886	1.78526	0.0242643	0.255117	1.4378	3.70216	3.71624	0.306025	100	4.3326
	OldCrow_017	77.6116	0.307992	13.5412	1.77161	0.0404531	0.301906	1.47871	1.46336	3.29045	0.248996	100	7.3272
	OldCrow_018	75.0294	0.271915	13.1149	1.67391	0.0394953	0.28083	1.42137	4.24179	3.69078	0.304274	100	2.8441
	OldCrow_019	75.5824	0.283801	13.1587	1.6679	0.0765108	0.269643	1.41256	3.6316	3.71436	0.261302	100	4.7964
	Mean	75.6619	0.302402	13.1954	1.72808	0.061625	0.281882	1.44962	3.46031	3.63985	0.282725	100	4.73617
	St. Dev.	0.99273	0.0225364	0.184659	0.0589245	0.0394368	0.0235451	0.0309558	1.00097	0.181844	0.0234523	0	1.46733

## Sheet: Table S4
Table S4: Unnormalised EPMA data (secondary standards and Cascade Lake samples).
Data provided here are single point analyses and are shown in the order they were analysed.
ID 3506 and Old Crow tephra were analysed at the start and end of each EPMA run, as well as in-between sets of >50 unknown analyses.
If the normalised data (Table S2) were corrected, this is noted under the data analysed but not shown here - these are the unnormalised data (with only Time Dependent Intensity corrections made, where listed).
Analytical conditions: 5 micron beam (exception: Nov 16th - 10 micron beam), 15 KeV and 6 nA current.
Date Analysed	SAMPLE	#	SiO2	TiO2	Al2O3	FeOt	MnO	MgO	CaO	Na2O	K2O	Cl	Total	Analytical notes
Feb 5 2018	ID3506_016	-	75.6324	0.064377	13.1469	1.59758	0.059365	0.026642	0.714514	4.18887	5.16017	0.303536	100.826	Secondary standard
	ID3506_017	-	75.2267	0.086883	13.3128	1.63512	0.057127	0.045516	0.684257	4.31574	5.03394	0.379245	100.692
NaTDI 5-micron beam data	ID3506_018	-	74.3319	0.080664	12.9151	1.54353	0.125776	0.052771	0.748072	4.26441	5.11897	0.347412	99.4503
Normalised data has Na and K corrected down (from ID 3506; not shown here)	OldCrow_016	-	72.7721	0.296845	12.5496	1.63899	0.042751	0.259954	1.32723	4.13674	3.50528	0.2784	96.7451	Secondary standard
	OldCrow_017	-	72.7665	0.252082	12.6422	1.63133	0.057069	0.271745	1.39756	3.60942	3.55179	0.307743	96.4181
	OldCrow_018	-	73.3684	0.344185	12.4605	1.67494	0.004934	0.290474	1.33029	3.77676	3.67499	0.280714	97.1429
	Br60-60_001	-	78.2052	0.183749	12.6629	1.09961	0.031759	0.212806	0.969674	3.86521	3.58454	0.286562	101.037	CL-48
	Br60-60_002	-	76.8656	0.091083	11.9573	1.08067	0.058326	0.152003	0.79122	4.24073	3.50919	0.336099	99.0064
	Br60-60_003	-	74.758	0.192287	12.3219	1.53365	0.08613	0.508813	0.919033	3.57758	3.41844	0.34792	97.5852
	Br60-60_004	-	68.9684	0.182027	9.23599	1.14329	0.074248	0.252637	0.390616	2.0599	3.56424	0.542434	86.2914
	Br60-60_005	-	74.9503	0.246228	14.0174	1.68614	0.044763	0.37739	1.49728	4.20889	3.24342	0.333193	100.53
	Br60-60_006	-	75.7208	0.143249	12.1193	1.08378	0.083102	0.156604	0.87233	3.21169	3.4242	0.372124	97.1032
	Br60-60_007	-	74.3817	0.208778	14.1053	1.42734	0.068716	0.352897	1.61034	3.98056	3.20265	0.321197	99.587
	Br60-60_008	-	62.5925	0.28047	11.9506	1.59804	0.034965	0.360512	1.37942	3.55624	2.72892	0.679402	85.0078
	Br60-60_009	-	72.3286	0.453353	14.4601	1.92122	0	0.454432	1.57157	5.05202	3.31429	0.220709	99.7265
	Br60-60_010	-	72.137	0.132864	13.2547	1.09862	0.040178	0.201615	1.38962	4.34469	3.37091	0.297642	96.2006
	Br60-60_011	-	71.7144	0.144826	13.1553	1.11977	0.057799	0.201648	1.34968	3.84599	3.38359	0.333941	95.2316
	Br60-60_012	-	76.6379	0.14775	12.8489	1.04278	0.047615	0.19917	1.13478	3.92774	3.58816	0.263266	99.7786
	Br60-60_013	-	74.2477	0.200827	11.4882	1.08907	0.040739	0.126377	0.6161	3.41221	3.61573	0.360104	95.1158
	Br60-60_014	-	73.7657	0.282278	13.743	1.74973	0.034551	0.429499	1.54834	4.29507	3.16494	0.331843	99.2701
	Br60-60_015	-	72.8753	0.179135	13.8529	1.43424	0.054998	0.311369	1.61442	4.1708	2.90662	0.400183	97.7097
	Br60-60_016	-	74.9943	0.082106	11.1021	0.942883	0.035293	0.124034	0.70218	3.30897	3.40844	0.292396	94.9267
	Br60-60_017	-	77.5319	0.104819	11.8222	1.06314	0.076885	0.125129	0.834045	3.53496	3.39623	0.282396	98.7079
	Br60-60_018	-	67.6756	0.107877	10.9381	0.932083	0.020922	0.137313	0.978929	3.3949	2.96135	0.469478	87.5106
	Br60-60_019	-	73.1665	0.045634	12.4092	0.419035	0.156902	0.089514	0.637337	2.98433	3.9115	0.057051	93.8642
	Br60-60_020	-	77.2359	0.112458	12.2466	0.916824	0.023982	0.122149	0.908318	3.78284	3.50019	0.313684	99.0922
	ID3506_019	-	73.7218	0.085007	12.8889	1.56505	0.070903	0.046331	0.728033	4.00353	5.11847	0.329638	98.4833	Secondary standard
	ID3506_020	-	74.3901	0.113823	13.106	1.58909	0.069255	0.02924	0.713035	4.21848	5.01395	0.320005	99.4907
	ID3506_021	-	73.4799	0.037943	12.9994	1.62299	0.087328	0.043345	0.730595	4.10058	5.03967	0.344506	98.4085
	ID3506_022	-	73.7353	0.109265	13.0859	1.60315	0.085447	0.046378	0.691784	4.17497	4.99989	0.350463	98.8035
	OldCrow_019	-	71.861	0.329155	12.6426	1.65162	0.048362	0.271553	1.42842	4.05843	3.64761	0.280712	96.1561	Secondary standard
	OldCrow_020	-	71.4657	0.291274	12.5357	1.70334	0.010566	0.285999	1.41858	4.16005	3.63488	0.276988	95.7205
	OldCrow_021	-	71.7717	0.368502	12.5193	1.68328	0.064557	0.295672	1.40117	3.95388	3.46399	0.268831	95.7301
	OldCrow_022	-	71.9396	0.371535	12.5489	1.71719	0.098124	0.291363	1.41799	3.75705	3.55516	0.247852	95.8888
April 27 2018	ID 3506_024	-	74.1304	0.072957	13.1733	1.57214	0.060438	0.027444	0.708483	3.91696	5.19743	0.356666	99.1357	Secondary standard
	ID 3506_025	-	73.9311	0.053601	13.1429	1.52788	0.036806	0.067694	0.700476	4.13831	5.19142	0.347677	99.0594
NaTDI 5-micron beam data	ID 3506_026	-	73.8706	0.004466	13.0193	1.55084	0.074514	0.030406	0.753901	4.0211	5.26032	0.310229	98.8256
Normalised data has Na corrected down (from Olc Crow; not shown here)	ID 3506_027	-	74.0016	0.080399	13.0543	1.53642	0.031129	0.0519	0.708325	3.84771	4.98489	0.341902	98.5615
	ID 3506_028	-	73.6756	0.096735	13.1235	1.63051	0.042475	0.007849	0.736821	4.03701	5.037	0.362611	98.6683
	Old Crow_024	-	72.4887	0.333344	12.5677	1.60398	0.036359	0.280256	1.41087	3.64191	3.68139	0.298851	96.276	Secondary standard
	Old Crow_025	-	72.2642	0.251452	12.486	1.59343	0.039766	0.284995	1.35906	3.61018	3.47828	0.247337	95.5589
	Old Crow_026	-	70.9106	0.315404	12.312	1.55847	0.100427	0.294787	1.33764	3.46557	3.61902	0.240436	94.1002
	Old Crow_027	-	72.4799	0.388242	12.4705	1.62453	0.054296	0.278747	1.42876	3.84747	3.64016	0.26882	96.4208
	Old Crow_028	-	71.8315	0.295979	12.5621	1.65488	0.044296	0.282042	1.36383	4.04629	3.62928	0.272572	95.9213
	Casc13-49_001	-	75.1451	0.134101	13.1033	0.663824	0.059828	0.127255	0.749762	4.74374	3.48438	0.113495	98.2992	CL-37
	Casc13-49_002	-	73.5041	0.126749	12.4366	0.558683	0.049159	0.119951	0.682583	4.0677	3.6905	0.125534	95.3333
	Casc13-49_003	-	74.7701	0.129704	12.8136	0.591306	0.065311	0.101349	0.683461	4.03965	3.6623	0.115031	96.9458
	Casc13-49_004	-	72.4192	0.123718	12.6961	0.642892	0.063713	0.116086	0.732813	4.02478	3.49811	0.095473	94.3914
	Casc13-49_005	-	72.4323	0.111786	12.7079	0.594365	0.108304	0.133919	0.744897	4.35278	3.51236	0.136785	94.8045
	Casc13-49_006	-	73.3704	0.119259	12.7727	0.577549	0.084876	0.117209	0.695872	4.30864	3.65994	0.114245	95.7949
	Casc13-49_007	-	73.1227	0.099889	12.5851	0.551225	0.08397	0.118012	0.674129	4.11012	3.60798	0.152611	95.0713
	Casc13-49_008	-	70.2926	0.132491	11.2349	1.36289	0.06754	0.449569	0.686611	3.44986	3.22828	0.373458	91.1939
	Casc13-49_009	-	73.3152	0.052248	12.1376	0.48748	0.089079	0.104156	0.606735	3.70371	3.72612	0.112916	94.3097
	Casc13-49_010	-	75.2513	0.046329	13.0949	0.367409	0.063604	0.071116	0.784012	3.95635	4.29005	0.08125	97.9879
	Casc13-49_011	-	73.7539	0.065729	12.6124	0.600912	0.135676	0.113511	0.715126	4.22584	3.6943	0.134835	96.0217
	Casc13-49_012	-	73.5886	0.083716	12.7477	0.593915	0.08283	0.117606	0.746848	4.40029	3.69841	0.130386	96.1609
	Casc13-51_001	-	71.8377	0.173216	14.0163	1.41213	0.012771	0.334578	1.63394	4.25687	3.00282	0.278513	96.896
	Casc13-51_002	-	72.2281	0.183728	13.9973	1.37672	0.065021	0.313215	1.68909	4.79843	3.01556	0.27329	97.8788
	Casc13-51_003	-	56.6126	0.110724	8.7057	0.791126	0.023524	0.128521	0.564463	3.05015	2.72632	0.631094	73.2018
	Casc13-51_004	-	70.8458	0.473693	14.6918	2.45558	0.126232	0.421393	1.46697	5.69757	3.10556	0.166843	99.4138
	Casc13-55_001	-	60.7253	0.169047	10.3846	0.960371	0.040655	0.157187	0.877766	3.35062	2.82346	0.555587	79.9191
	Casc13-55_002	-	75.3042	0.181145	12.7004	1.12108	0.026517	0.23444	1.03279	3.84377	3.43201	0.327737	98.1301
	Casc13-55_003	-	65.9683	0.031369	20.3207	0.02223	0	0	1.17178	11.3318	0.090294	0.009854	98.9442
	ID 3506_029	-	74.1312	0.126616	13.1679	1.58392	0.080729	0.037321	0.705083	4.20933	5.2098	0.359785	99.5305	Secondary standard
	ID 3506_030	-	74.1754	0.126595	13.2898	1.59534	0.084814	0.035333	0.702162	4.12659	5.16652	0.319342	99.5498
	ID 3506_031	-	74.1854	0.055128	13.1063	1.60309	0.039802	0.048017	0.692826	3.89555	5.20337	0.356933	99.1059
	ID 3506_032	-	74.2491	0.070036	13.1542	1.41475	0.089616	0.032362	0.708064	4.13811	5.23143	0.284951	99.3083
	ID 3506_033	-	74.692	0.061066	13.1842	1.5406	0.083677	0.062821	0.747204	4.24025	5.12996	0.265441	99.9473
	Old Crow_029	-	72.5193	0.253079	12.7434	1.70627	0.051172	0.278942	1.34863	3.96064	3.70198	0.269623	96.7722	Secondary standard
	Old Crow_030	-	72.4841	0.324543	12.6322	1.69076	0.05573	0.282758	1.37252	3.86525	3.50224	0.260742	96.412
	Old Crow_031	-	71.2281	0.275427	12.5233	1.597	0.094624	0.251452	1.33812	3.92515	3.51556	0.271221	94.9588
	Old Crow_032	-	71.0139	0.230822	12.4836	1.65402	0.066428	0.257885	1.30074	3.60996	3.69275	0.2682	94.5178
	Old Crow_033	-	72.5507	0.370752	12.6167	1.61925	0.077346	0.24997	1.40273	4.23566	3.58661	0.300478	96.9424
May 23 2018	ID 3506_001	-	74.2813	0.094454	13.1969	1.61545	0.050604	0.04553	0.732166	4.19646	5.29674	0.3477	99.7788	Secondary standard
	ID 3506_002	-	74.873	0.060401	13.328	1.48085	0.032635	0.011337	0.719803	3.81106	5.16562	0.301754	99.7163
NaSiTDI 5-micron beam data	ID 3506_003	-	73.8824	0.015487	12.9967	1.46633	0.063131	0.044415	0.709672	4.07386	5.25304	0.323903	98.7558
Normalised data has Na corrected down (from Olc Crow; not shown here)	ID 3506_004	-	74.8549	0.086713	13.2063	1.4937	0.07779	0.047537	0.696687	4.19196	5.14539	0.335545	100.061
	ID 3506_005	-	74.7311	0.113048	13.0579	1.45958	0.074946	0.037245	0.763419	4.34588	5.27732	0.336126	100.121
	ID 3506_006	-	74.6948	0.077444	13.1815	1.46629	0.040669	0.061852	0.714025	3.86347	5.22008	0.335521	99.5799
	Old Crow_001	-	72.726	0.346672	12.6925	1.65823	0.058883	0.310692	1.39673	3.61195	3.56181	0.248263	96.5557	Secondary standard
	Old Crow_002	-	71.572	0.318816	12.1908	1.65125	0.049414	0.298655	1.42338	3.68229	3.66864	0.268896	95.0635
	Old Crow_003	-	72.6444	0.287928	12.5761	1.61321	0.069286	0.306755	1.37075	3.75827	3.68124	0.319106	96.5551
	Old Crow_004	-	72.3309	0.331371	12.5724	1.54656	0.047063	0.284915	1.42474	3.69267	3.71915	0.290561	96.1748
	Old Crow_005	-	72.7248	0.305103	12.8462	1.58745	0.026967	0.264142	1.44449	4.20842	3.68374	0.262121	97.2943
	Old Crow_006	-	73.2425	0.255566	12.7878	1.67831	0.051804	0.29624	1.43376	3.61332	3.80558	0.299899	97.3971
	Casc13-60_001	-	71.5072	0.266946	14.5346	1.48285	0.046643	0.34467	1.84082	4.48674	3.02728	0.346281	97.8058	CL-48
	Casc13-60_002	-	69.6471	0.18774	10.3195	0.870561	0.015016	0.100862	0.513707	2.88626	3.54138	0.40035	88.3922
	Casc13-60_003	-	75.4856	0.178304	12.3329	0.9708	0.051473	0.147731	1.02168	3.71795	3.49438	0.336384	97.6613
	Casc13-60_004	-	75.9027	0.106405	13.6353	0.854104	0.02908	0.111564	1.27634	3.9615	3.36033	0.232903	99.4177
	Casc13-60_005	-	76.9301	0.23778	11.9257	1.03711	0.050527	0.123928	0.592979	3.60143	3.97805	0.291266	98.7031
	Casc13-60_006	-	78.1945	0.093893	12.6751	0.874183	0.04983	0.132573	1.03178	4.35923	3.28159	0.223807	100.866
	Casc13-60_007	-	76.2959	0.15651	12.5107	0.956987	0.06247	0.105815	0.983651	2.92528	3.28248	0.276095	97.4937
	Casc13-60_008	-	71.6355	0.132948	11.9259	1.0414	0.069109	0.184145	0.894664	3.67906	3.15958	0.358388	92.9997
	Casc13-60_009	-	72.7435	0.33416	13.2407	1.9002	0.048786	0.398515	1.33311	3.48301	3.64655	0.424704	97.4574
	Casc13-60_010	-	72.6382	0.245151	13.7627	1.56253	0.059235	0.374041	1.48196	3.7004	3.58389	0.30893	97.6474
	Casc13-60_011	-	72.3114	0.306968	13.6977	1.55707	0.079054	0.403382	1.45943	3.69678	3.58453	0.309811	97.3362
	Casc13-60_012	-	99.4803	0.009383	0.052398	0.025399	0	0	0.002934	0.009468	0.016632	0.003953	99.5996
	Casc13-60_013	-	72.0064	0.187394	13.8765	1.44575	0.067234	0.310794	1.55763	4.05911	3.35292	0.302601	97.098
	Casc13-60_014	-	75.896	0.10347	11.9317	1.26001	0.063521	0.223463	0.919656	3.54386	3.28626	0.284748	97.4484
	Casc13-60_015	-	74.3388	0.146576	12.4603	0.916592	0.013154	0.110897	1.05787	3.63829	3.49922	0.234149	96.363
	Casc13-60_016	-	76.595	0.168397	12.4344	1.07141	0.004234	0.117171	0.842825	3.60821	3.74554	0.238369	98.7718
	Casc13-60_017	-	73.5416	0.165738	12.5315	1.0601	0.038918	0.186449	1.0652	3.8746	3.31241	0.276777	95.9908
	Casc13-60_018	-	61.6701	0.021757	23.3834	0.21872	0	0.013558	5.88149	7.26291	0.589492	0.03304	99.067
	Casc13-60_019	-	74.7533	0.112077	14.6773	0.765635	0.071803	0.104286	1.75149	4.89667	2.78102	0.199071	100.068
	Casc13-60_020	-	72.7417	0.104512	10.853	0.903426	0.022795	0.099944	0.556303	3.77279	3.55097	0.340099	92.8688
	Casc13-60_021	-	73.1206	0.068695	17.5938	0.663187	0.002851	0.059955	2.21467	5.07071	2.52784	0.149058	101.438
	ID 3506_007	-	73.5226	0.059234	13.2319	1.49158	0.032729	0.055924	0.689242	4.18919	5.15785	0.32841	98.6845	Secondary standard
	ID 3506_008	-	74.2033	0.03579	13.278	1.43617	0.075987	0.031991	0.713693	3.99842	5.24992	0.33164	99.28
	ID 3506_009	-	73.8487	0.105581	12.9466	1.57623	0.055745	0.05051	0.724195	3.92616	5.30061	0.323918	98.7852
	ID 3506_010	-	74.3348	0.092964	12.7892	1.46368	0.069057	0.051367	0.727326	3.87827	5.23491	0.311007	98.8824
	ID 3506_011	-	73.5466	0.101961	12.9388	1.55178	0.021384	0.04624	0.720481	4.26508	5.2941	0.303102	98.7211
	ID 3506_012	-	74.1682	0.143251	12.9163	1.49516	0.0403	0.055189	0.719356	3.98977	5.14924	0.347372	98.9457
	Old Crow_007	-	69.7955	0.236173	11.9047	1.61486	0.062555	0.260084	1.418	3.70486	3.6177	0.284813	92.835	Secondary standard
	Old Crow_008	-	70.052	0.33199	12.2838	1.51173	0.074043	0.284856	1.34919	3.3424	3.64153	0.290216	93.0962
	Old Crow_009	-	69.6949	0.295241	12.1429	1.53532	0.004656	0.249179	1.39567	3.83815	3.42303	0.273566	92.7909
	Old Crow_010	-	71.2155	0.363056	12.3556	1.55253	0.067379	0.304488	1.38374	3.82952	3.64014	0.241928	94.8992
	Old Crow_011	-	71.327	0.276178	12.5496	1.62535	0.06422	0.281495	1.37089	3.82553	3.51016	0.25311	95.0264
	Old Crow_012	-	73.3213	0.290242	12.7789	1.66975	0.034587	0.311481	1.48039	4.50351	3.70542	0.269948	98.3046
Aug 17 2018	ID 3506_001	-	74.4205	0.08827	13.125	1.60238	0.066167	0.03522	0.703646	3.90662	5.12454	0.297895	99.303	Secondary standard
	ID 3506_002	-	74.6876	0.057499	13.2212	1.57242	0.105084	0.043387	0.720604	4.03545	5.19055	0.332711	99.8914
NaSiTDI 5-micron beam data	ID 3506_003	-	74.0785	0.066434	13.2606	1.58853	0.079268	0.045412	0.70585	3.82767	5.16102	0.302624	99.0476
Normalised data has Si corrected down (from ID 3506; not shown here)	ID 3506_004	-	74.4032	0.122549	13.1228	1.53683	0.07858	0.045392	0.742687	3.79339	5.25872	0.360627	99.3835
	ID 3506_005	-	75.2085	0.08703	13.3108	1.50752	0.065197	0.025227	0.692652	4.12258	5.23976	0.310524	100.5
	Old Crow_001	-	71.2927	0.214667	12.5926	1.63519	0.049364	0.31133	1.35356	3.47421	3.48033	0.289014	94.6277	Secondary standard
	Old Crow_002	-	72.3293	0.364216	12.851	1.6079	0.051065	0.274666	1.45614	3.45838	3.5352	0.271282	96.1379
	Old Crow_003	-	71.395	0.244151	12.5594	1.55602	0.096435	0.294964	1.44024	3.50701	3.62626	0.283753	94.9392
	Old Crow_004	-	72.391	0.369454	12.7299	1.63211	0.043347	0.29228	1.34096	3.61094	3.39743	0.264835	96.0125
	Old Crow_005	-	72.2641	0.309262	12.439	1.56847	0.05651	0.313116	1.42011	3.57903	3.5631	0.285901	95.7341
	UA 1602_001	-	68.6943	0.429403	14.7516	2.35027	0.150112	0.464137	1.68047	5.32141	3.04989	0.184735	97.0346	Aniakchak CFE II
	UA 1602_002	-	67.0885	0.474471	14.3706	2.31347	0.117636	0.456286	1.63082	5.18786	2.95841	0.19673	94.7503	Zagoskin Lake, St. Michael Island, Alaska
	UA 1602_003	-	67.8204	0.529978	14.6595	2.31913	0.136778	0.486244	1.63364	6.30297	3.12772	0.181976	97.1573	Ager (2003); Davies et al. (2016)
	UA 2614_001	-	72.0691	0.235663	14.2993	1.87384	0.057573	0.479464	2.18044	4.44845	2.48485	0.37998	98.4229	Hayes set H - unit F2
	UA 2614_002	-	67.8185	0.159887	13.3962	1.61103	0.098783	0.453056	1.97393	3.83348	2.4504	0.472668	92.1612	Hayes River section
	UA 2614_003	-	69.4056	0.244165	13.9609	1.81925	0.035808	0.521856	2.23823	3.49939	2.48007	0.365764	94.4884	Wallace et al. (2014); Davies et al. (2016)
	Casc13-63_001	-	69.379	0.022022	19.4345	0.020387	0	0.001037	0.037801	11.6507	0.046497	0.012761	100.602
	Casc13-63_002	-	70.0955	0.49732	15.0933	2.36746	0.100459	0.536392	1.74293	5.44037	3.10921	0.211804	99.1469
	Casc13-63_003	-	70.9059	0.493051	15.2774	2.30039	0.128286	0.514842	1.65074	5.6626	3.03502	0.199217	100.123
	Casc13-73_001	-	71.4042	0.477778	15.2193	2.39311	0.130616	0.455618	1.60276	5.60479	3.1015	0.216645	100.558	CL-61
	Casc13-73_002	-	74.4481	0.310094	13.1168	1.61473	0.060705	0.364073	1.80471	4.26145	1.99844	0.122858	98.0741
	Casc13-73_003	-	77.3981	0.433825	11.8079	1.20957	0.061211	0.095412	0.578474	4.25655	3.79718	0.06629	99.6896
	Casc13-73_004	-	77.9199	0.442595	11.4063	1.39094	0	0.143878	0.448907	3.88788	4.06763	0.084321	99.7734
	Casc13-73_005	-	76.0275	0.231585	12.5554	1.1971	0.020163	0.349754	1.96337	3.88444	1.6916	0.088275	97.9892
	Casc13-73_006	-	76.1163	0.313647	13.1599	1.69338	0.059624	0.367159	1.73844	4.33705	1.98313	0.133841	99.8722
	Casc13-73_007	-	78.0499	0.197863	12.4153	1.2651	0.084383	0.333743	2.04593	3.81369	1.63635	0.108102	99.9259
	Casc13-73_008	-	78.773	0.195642	12.9521	1.16471	0.02756	0.329529	2.13805	4.1142	1.54288	0.079271	101.299
	Casc13-73_009	-	72.118	0.402928	14.7434	2.45526	0.16312	0.382428	1.42026	4.90063	3.27445	0.179051	99.9992
	Casc13-73_010	-	73.6456	0.304949	14.0733	1.92118	0.082065	0.477648	2.2685	4.49191	1.73638	0.242257	99.1891
	Casc13-73_011	-	70.7599	0.42463	15.3184	2.3312	0.154095	0.490904	1.68744	6.03577	2.90445	0.216627	100.275
	Casc13-73_012	-	69.6791	0	19.266	0	0	0.010263	0.000344	11.491	0.021338	0	100.468
	Casc13-73_013	-	73.758	0.337667	13.8799	1.92704	0.080282	0.469376	2.22938	4.44465	1.71984	0.250555	99.0401
	Casc13-73_014	-	76.5752	0.214317	12.7484	1.28955	0.063535	0.330305	2.01344	4.14268	1.5628	0.108962	99.0246
	UA 1602_001	-	57.5834	1.37229	15.8992	8.00853	0.205436	3.12583	5.9856	4.51631	1.48021	0.114431	98.2654	Aniakchak CFE II
	UA 1602_002	-	70.6467	0.489524	15.1864	2.53849	0.134662	0.523483	1.6998	5.36833	3.02807	0.18619	99.7597
	UA 1602_003	-	70.507	0.557831	15.041	2.54316	0.164901	0.509723	1.67339	5.68618	3.0205	0.192084	99.8524	Zagoskin Lake, St. Michael Island, Alaska
	UA 1602_004	-	59.7779	1.47659	16.2305	6.0302	0.192803	2.4952	5.03416	4.90606	1.80065	0.082945	98.0083	Ager (2003); Davies et al. (2016)
	UA 1602_005	-	58.0411	1.36161	16.2281	7.24633	0.189636	2.98261	5.79706	4.46117	1.57121	0.128487	97.9783	Analysed concurrently with unknown sample
	UA 2557_001	-	73.6385	0.373778	14.1541	2.03245	0.117093	0.506831	2.22768	4.8796	2.05001	0.184452	100.123
	UA 2557_002	-	73.8615	0.248164	13.4625	1.79148	0.064033	0.401002	1.93065	4.71534	2.08103	0.197549	98.7087	Ruppert tephra
	UA 2557_003	-	72.7324	0.345117	14.0216	2.06869	0.143287	0.482584	2.25651	4.78244	1.86087	0.208727	98.8552
	UA 2557_004	-	72.9326	0.26613	13.7627	2.09031	0.086209	0.459293	2.17033	5.01138	1.89728	0.235112	98.8582	Ruppert Lake, Alaska
	UA 2557_005	-	72.1192	0.364932	13.8856	2.04471	0.073167	0.473809	2.19528	4.64824	1.81401	0.244257	97.808	Monteath et al. (2017)
	UA 2557_006	-	72.9252	0.29836	14.2043	1.97318	0.038244	0.487058	2.28339	5.07718	1.92168	0.236698	99.3919
	UA 2557_006	-	71.6152	0.45144	15.2856	2.44898	0.157013	0.508755	1.69211	5.67566	3.02604	0.196148	101.013	Analysed concurrently with unknown sample
	UA 2557_007	-	74.2677	0.257724	13.945	1.91186	0.142203	0.43355	2.10776	4.57659	1.85048	0.21418	99.6587
	UA 2557_008	-	74.0185	0.292895	14.2311	2.17378	0.084654	0.51722	2.25106	4.67032	1.86221	0.216367	100.269
	UA 2557_009	-	74.9055	0.211238	13.9409	1.89563	0.157606	0.359821	2.03169	4.67646	2.12913	0.218178	100.477
	UA 2557_010	-	74.0214	0.296579	13.6454	1.88983	0.098884	0.399911	2.12175	4.77438	1.92975	0.232534	99.3579
	UA 2557_011	-	1.92986	0.007338	0.212713	0.070869	0	0.004631	0.066378	0.031132	0.068084	1.32798	3.41932
	UA 2557_012	-	75.9346	0.3178	13.7332	1.826	0.071896	0.37689	2.02452	4.39559	2.00851	0.261456	100.892
	UA 2557_013	-	74.894	0.296947	14.2759	2.00998	0.112835	0.505542	2.24681	4.77642	2.02666	0.222306	101.317
	UA 2557_014	-	73.9068	0.345126	13.9377	1.99561	0.089052	0.480162	2.16499	4.78065	1.83008	0.155865	99.6509
	UA 2557_015	-	73.2107	0.308296	13.8751	2.01277	0.065781	0.499926	2.30478	4.98694	1.77496	0.247381	99.2308
	UA 2557_016	-	73.9385	0.368341	13.7453	2.04212	0.102786	0.473828	2.23052	5.05327	1.84847	0.236136	99.986
	UA 2557_017	-	73.6382	0.242112	13.9401	2.19042	0.118638	0.414572	2.28282	4.71583	2.00793	0.202547	99.7074
	UA 2557_018	-	72.632	0.286385	13.6403	1.94712	0.105394	0.453395	2.20427	4.57	1.80153	0.207276	97.8009
	UA 2557_019	-	73.9384	0.363165	13.8355	2.02225	0.078565	0.45451	2.15931	4.81734	1.90479	0.2448	99.7634
	UA 2557_020	-	74.0745	0.268139	13.8152	1.76618	0.101566	0.425036	2.03725	4.80171	1.92137	0.207949	99.3719
	ID 3506_006	-	75.1886	0.094591	13.1536	1.48653	0.096853	0.0664	0.71122	3.89905	5.25764	0.358777	100.232	Secondary standard
	ID 3506_007	-	75.2535	0.072548	13.2274	1.46231	0.030568	0.015148	0.684881	4.31598	5.13179	0.308713	100.433
	ID 3506_008	-	75.3535	0	13.277	1.57895	0.046623	0.051533	0.728185	4.04887	5.24469	0.321137	100.578
	ID 3506_009	-	75.8912	0.102427	13.1931	1.51478	0.108445	0.020263	0.715741	4.28804	5.23613	0.320715	101.318
	ID 3506_010	-	75.5652	0.099531	13.3483	1.48024	0.067627	0.023287	0.693586	4.17614	5.10466	0.320296	100.807
	Old Crow_006	-	73.5097	0.273299	12.8525	1.66922	0.066969	0.281749	1.43918	3.84315	3.62446	0.293833	97.7878	Secondary standard
	Old Crow_007	-	72.34	0.328347	12.6427	1.60789	0.051635	0.298691	1.36733	3.6391	3.68497	0.282562	96.1795
	Old Crow_008	-	72.7781	0.289633	12.9383	1.62384	0.064418	0.261439	1.36127	3.84889	3.57827	0.274338	96.9566
	Old Crow_009	-	72.4538	0.347751	12.6911	1.57346	0.064674	0.346289	1.43302	3.63875	3.7974	0.278741	96.5621
	Old Crow_010	-	72.7478	0.257023	12.4804	1.64808	0.077237	0.292895	1.30965	3.74628	3.61434	0.224077	96.3472
	Casc13-86_001	-	70.424	0.265604	12.9538	1.96025	0.096988	0.461109	2.17467	4.38705	1.80557	0.313239	94.7716	CL-74
	Casc13-86_002	-	71.6518	0.311618	13.806	1.91805	0.095596	0.421121	2.23613	4.8907	1.92376	0.275494	97.4681
	Casc13-86_003	-	72.8558	0.287923	13.7507	1.91521	0.109578	0.430294	2.18578	4.5982	1.8637	0.284726	98.2177
	Casc13-86_004	-	71.2555	0.521326	15.224	2.41398	0.117764	0.489423	1.61883	5.62507	2.91239	0.224407	100.352
	Casc13-86_005	-	72.6174	0.262638	13.7218	1.97132	0.160532	0.452077	2.24928	4.62718	1.72185	0.287017	98.0064
	Casc13-86_006	-	74.69	0.311676	13.7553	1.93173	0.11403	0.444629	2.13219	5.07707	1.83133	0.25396	100.485
	Casc13-86_007	-	75.5074	0.25402	13.6173	1.76322	0.113652	0.375602	1.94241	4.57966	1.90747	0.235423	100.243
	Casc13-86_008	-	73.6322	0.29395	13.8215	1.94969	0.118734	0.416877	2.08587	4.89199	1.79229	0.240507	99.1893
	Casc13-86_009	-	74.882	0.366968	14.1098	2.07507	0.075939	0.47598	2.36178	4.37599	1.9764	0.242729	100.888
	Casc13-86_010	-	72.3942	0.298582	14.0228	1.90488	0.101785	0.462044	2.24598	5.21073	1.90715	0.248691	98.7406
	Casc13-86_011	-	74.5754	0.303161	13.825	1.89178	0.120018	0.402406	2.06538	4.80436	1.94544	0.187129	100.078
	Casc13-86_012	-	74.5465	0.278053	13.6238	1.80259	0.100253	0.383838	2.00159	4.78367	1.98757	0.257401	99.7072
	Casc13-86_013	-	74.1171	0.266194	13.971	1.96541	0.065529	0.427894	2.08232	4.32655	1.96708	0.250647	99.3832
	Casc13-86_014	-	73.1762	0.426234	14.3207	2.33376	0.107177	0.661075	2.46178	5.08738	1.87515	0.177831	100.587
	Casc13-86_015	-	72.4565	0.380199	14.5503	2.45918	0.109042	0.594834	2.51684	4.77988	1.98552	0.195093	99.9834
	Casc13-86_016	-	73.1778	0.324234	13.8051	1.82383	0.130867	0.435695	2.13182	4.89257	1.78884	0.277099	98.7253
	Casc13-86_017	-	74.654	0.236594	13.6875	1.78003	0.156122	0.394369	2.08226	4.41723	1.88078	0.245572	99.4791
	Casc13-86_018	-	73.0121	0.322653	13.9078	1.99146	0.090503	0.499463	2.19148	5.20254	1.76413	0.239282	99.1673
	Casc13-86_019	-	76.7746	0.232128	13.5748	1.76362	0.059041	0.33883	1.901	4.93425	1.96571	0.284163	101.764
	Casc13-86_020	-	74.6319	0.26179	13.6862	1.90501	0.079791	0.426582	2.07464	4.62934	1.94772	0.23637	99.826
	Casc13-86_021	-	73.6048	0.346518	13.9824	1.90245	0.084679	0.434498	2.24923	4.48089	1.88491	0.232458	99.1504
	Casc13-86_022	-	58.7845	0.462772	13.7181	8.33382	0.330275	0.103778	0.795441	8.30008	3.94477	0.318071	95.0199
	Casc13-86_023	-	74.2169	0.32499	14.1231	2.0857	0.125728	0.493958	2.26565	5.37775	1.98483	0.252984	101.195
	Casc13-86_024	-	74.2436	0.229689	13.6975	1.83954	0.102519	0.43054	2.03795	5.23013	1.92337	0.264803	99.9399
	Casc13-86_025	-	73.4311	0.335162	13.9564	1.98497	0.132295	0.451806	2.13838	5.09633	1.83707	0.231622	99.5429
	Casc13-86_026	-	74.321	0.343282	13.8936	1.76439	0.115337	0.454601	2.1201	4.65472	1.90686	0.210903	99.7372
	Casc13-86_027	-	74.1115	0.379022	13.965	2.06894	0.067544	0.606732	2.31433	4.41148	1.79554	0.211796	99.8841
	Casc13-86_028	-	74.832	0.264045	14.1053	1.9826	0.12845	0.458324	2.15379	4.71419	1.82972	0.221998	100.64
	Casc13-86_029	-	73.4081	0.315055	14.0959	2.08605	0.097041	0.515621	2.28578	4.92144	1.90912	0.240921	99.8207
	Casc13-86_030	-	73.1923	0.222747	13.3856	1.77848	0.04047	0.392671	1.90758	4.96884	1.80398	0.26273	97.8962
	Casc13-86_031	-	75.0625	0.325135	13.8373	2.00047	0.094691	0.469292	2.18869	4.57637	1.90541	0.25502	100.657
	Casc13-86_032	-	75.5372	0.29486	13.1493	1.74014	0.068349	0.330462	1.91017	0.67542	1.812	0.25659	95.7166
	Casc13-86_033	-	73.5839	0.27372	14.1611	1.92669	0.115313	0.499112	2.24633	4.88584	1.92559	0.186449	99.7619
	Casc13-86_034	-	74.0099	0.357136	13.8776	1.99172	0.111874	0.45638	2.25664	4.96408	1.9122	0.248074	100.13
	Casc13-86_035	-	73.5078	0.284201	13.7196	1.76029	0.107116	0.435165	2.09518	4.73407	2.07135	0.256405	98.9133
	Casc13-86_036	-	74.4141	0.278271	14.1133	2.14234	0.117012	0.516634	2.40928	4.72712	1.8705	0.240809	100.775
	Casc13-86_037	-	74.4048	0.300526	13.424	1.83763	0.121253	0.405687	2.03916	4.79663	1.99535	0.26044	99.5267
	Casc13-86_038	-	58.5931	0.514363	13.7084	8.3169	0.391042	0.151792	0.817097	8.0154	3.97403	0.29706	94.7122
	Casc13-86_039	-	73.1838	0.283447	13.8175	2.03847	0.102336	0.443797	2.19348	4.57281	2.24438	0.285205	99.101
	Casc13-86_040	-	73.8603	0.253107	13.8757	1.94111	0.100943	0.448555	2.19683	4.70192	1.87653	0.23007	99.4331
	Casc13-117_001	-	71.0419	0.462416	15.1573	2.35481	0.109138	0.552911	1.69676	5.49437	3.04248	0.167827	100.042	CL-105
	Casc13-117_002	-	70.4227	0.510312	15.3048	2.41259	0.127628	0.52738	1.5926	5.73072	2.98866	0.196516	99.7696
	Casc13-117_003	-	70.8107	0.509567	15.1398	2.33303	0.152166	0.509694	1.61798	5.18708	2.91194	0.188618	99.318
	Casc13-117_004	-	70.4833	0.440515	14.9422	2.37501	0.120732	0.486368	1.59585	5.72032	2.81129	0.202303	99.1323
	Casc13-117_005	-	74.24	0.257994	13.9533	1.49617	0.052356	0.236282	0.698865	5.54074	3.30372	0.251918	99.9745
	Casc13-117_006	-	70.8487	0.452921	15.1544	2.38166	0.138532	0.495557	1.65808	5.5543	3.12972	0.228597	99.9908
	Casc13-117_007	-	70.894	0.475527	14.9393	2.26719	0.125862	0.486973	1.69003	5.72637	2.95062	0.189846	99.7029
	Casc13-117_008	-	70.7388	0.635509	14.698	2.61521	0.128878	0.472343	1.60215	4.76196	3.72134	0.152092	99.4919
	Casc13-117_009	-	71.4472	0.523167	15.2857	2.30946	0.150619	0.548307	1.68907	5.59809	2.91159	0.196735	100.616
	Casc13-117_010	-	70.4541	0.523036	15.089	2.36848	0.107074	0.530217	1.62288	6.22195	2.88741	0.204183	99.9623
	Casc13-117_011	-	70.8358	0.453469	15.1625	2.41221	0.103142	0.549478	1.57338	5.85531	2.79199	0.215601	99.9043
	Casc13-117_012	-	72.1967	0.483797	14.7196	2.22137	0.07526	0.347943	1.37244	4.59519	3.65016	0.181012	99.8025
	Casc13-117_013	-	102.182	0.035931	0.043777	0.017447	0.001645	0.007828	0.002848	0.003002	0	0.024646	102.313
	Casc13-117_014	-	71.4266	0.503001	14.6621	2.27623	0.093899	0.392445	1.41596	5.11211	3.65859	0.175673	99.6769
	Casc13-117_015	-	69.2541	0.449221	15.1088	2.26371	0.183316	0.516444	1.6155	6.00538	2.93338	0.210264	98.4926
	Casc13-117_016	-	69.0866	0.501438	15.0478	2.15263	0.114673	0.482594	1.56692	5.13188	2.79322	0.154127	96.9971
	Casc13-117_017	-	70.9205	0.474551	15.0993	2.37921	0.160337	0.565191	1.65566	5.23197	2.72171	0.180456	99.3482
	Casc13-117_018	-	71.1257	0.474717	14.9091	2.20668	0.166198	0.517758	1.58759	5.3071	2.78256	0.220336	99.2479
	Casc13-117_019	-	65.445	0.377052	12.8177	2.11687	0.051285	0.345472	1.15981	4.72356	3.37292	0.374746	90.6998
	Casc13-117_020	-	71.8072	0.427754	14.6821	2.11697	0.112661	0.402759	1.31498	4.86702	3.68939	0.161605	99.5459
	Casc13-117_021	-	68.5567	0.475458	14.7133	3.20575	0.175354	0.540721	1.88065	5.32774	3.23535	0.163452	98.2377
	UA 1602_006	-	54.8781	1.36602	15.5624	7.44135	0.219379	3.00035	5.91216	4.46434	1.43852	0.120546	94.3759
	UA 1602_007	-	70.1218	0.495707	14.8792	2.43436	0.14787	0.530015	1.72245	5.4664	3.06312	0.199151	99.0152	Aniakchak CFE II
	UA 1602_008	-	69.679	0.592977	15.3624	3.06242	0.178079	0.755153	2.25653	5.22082	2.83019	0.184635	100.081
	UA 1602_009	-	60.6382	1.29386	16.3804	6.30041	0.262598	2.47729	5.20577	4.60283	1.75293	0.127024	99.0127	Zagoskin Lake, St. Michael Island, Alaska
	UA 1602_010	-	64.0844	1.04969	15.1611	6.10844	0.251248	1.36072	3.51763	4.42362	3.02631	0.113074	99.0706	Ager (2003); Davies et al. (2016)
	UA 1602_011	-	56.3435	1.32079	16.0338	7.81548	0.229623	3.13935	6.32518	4.40096	1.36453	0.12486	97.0699
	UA 1602_012	-	56.7263	1.31936	16.0434	7.77006	0.216413	3.02904	6.42332	4.5891	1.41477	0.144011	97.6432	Analysed concurrently with unknown sample
	UA 1602_013	-	57.7781	1.38724	16.1828	7.51491	0.20951	3.08267	6.32507	4.14414	1.51123	0.080533	98.1981
	UA 1602_014	-	69.8871	0.441183	15.0205	2.59582	0.155951	0.570146	1.69239	5.16072	2.94352	0.219026	98.637
	UA 1602_015	-	56.0617	1.42641	15.8056	8.25644	0.232072	3.01836	6.22633	4.23159	1.41401	0.151202	96.7895
	UA 1602_016	-	56.8458	1.31577	16.0835	7.59509	0.229552	2.92696	5.92308	4.23902	1.48321	0.144823	96.7542
	UA 1602_017	-	58.5151	1.3724	15.8242	6.47047	0.214515	2.69365	5.55087	5.00078	1.57647	0.125209	97.3153
	UA 1602_018	-	58.2309	1.39369	16.4031	7.28887	0.216811	2.75186	6.06921	4.24777	1.43498	0.132533	98.1398
	UA 1602_019	-	54.8062	0.481857	11.6836	2.17153	0.106308	0.444475	1.30266	4.44938	2.43583	0.471926	78.2473
	UA 1602_020	-	58.4541	1.4615	16.058	7.20831	0.2208	2.84203	5.93148	4.29069	1.57131	0.107367	98.1214
	UA 1602_021	-	57.4234	1.31758	16.1791	7.61176	0.240533	3.03955	6.09311	4.38969	1.49646	0.122789	97.8863
	UA 1602_022	-	69.8622	0.527586	15.0751	2.42018	0.112804	0.502276	1.58482	5.81876	2.88387	0.184728	98.9306
	UA 1602_023	-	59.2043	1.36971	15.9111	7.16183	0.145502	2.79914	5.74049	4.93055	1.647	0.13532	99.0144
	UA 1602_024	-	57.6264	1.22079	16.1123	7.72005	0.209939	2.92652	6.09207	4.4105	1.5022	0.13269	97.9235
	UA 1602_025	-	58.0788	1.41941	16.2222	7.13076	0.241645	3.02562	5.94483	4.67719	1.56673	0.108822	98.3914
	ID 3506_011	-	75.3906	0.103225	13.1152	1.47111	0.056928	0	0.656131	4.16175	5.12136	0.330561	100.332	Secondary standard
	ID 3506_012	-	75.1207	0.104475	13.2276	1.59299	0.09237	0.019062	0.706828	4.36981	5.33091	0.348197	100.834
	ID 3506_013	-	75.2736	0.054402	13.3174	1.47959	0.057226	0.059019	0.719472	4.27352	5.06534	0.334051	100.558
	ID 3506_014	-	74.3488	0.073454	13.2334	1.56478	0.049111	0.041001	0.660805	4.2113	5.12387	0.38263	99.6027
	ID 3506_015	-	75.3131	0.039661	13.1183	1.62866	0.068475	0.034974	0.72563	4.05705	5.1583	0.3463	100.412
	Old Crow_011	-	72.4183	0.283358	12.3173	1.5939	0.068263	0.23853	1.30924	3.60425	3.47945	0.302437	95.5468	Secondary standard
	Old Crow_012	-	72.1862	0.32143	12.4733	1.69184	0.054189	0.301475	1.32762	3.57169	3.42243	0.26377	95.5545
	Old Crow_013	-	71.9193	0.27157	12.5585	1.64273	0.036666	0.244175	1.3419	3.40884	3.43591	0.278634	95.0754
	Old Crow_014	-	72.0466	0.286162	12.5029	1.65604	0.092215	0.2594	1.39471	3.51404	3.56298	0.269522	95.5238
	Old Crow_015	-	71.8506	0.252611	12.523	1.62937	0.023531	0.265621	1.38744	3.64056	3.58534	0.258552	95.3583
	Casc13-135_001	-	73.2014	0.215913	12.8444	1.37166	0.074368	0.298679	1.49436	4.57741	1.87883	0.156024	96.0779
	Casc13-135_002	-	101.753	0.031071	0.013575	0.010772	0.016519	0.020287	0	0	0.007953	0.009134	101.861
	Casc13-135_003	-	101.717	0.119928	0	0	0.017695	0.011603	0	0	0	0.015994	101.879
	Casc13-135_004	-	75.2142	0.209133	12.3599	1.27873	0.034738	0.224822	1.31492	4.63004	1.94866	0.169979	97.3468
	Casc13-145_001	-	77.0203	0.274442	12.4951	1.35203	0.084926	0.344593	1.9073	3.98753	1.4754	0.170339	99.0735
	Casc13-145_002	-	68.4266	0	19.4143	0.01183	0	0.003116	0.079596	11.8962	0.022583	0.026388	99.8746
	Casc13-145_003	-	101.412	0.034284	0	0.015192	0	0	0.003549	0	0.013732	0.017635	101.492
	UA 2614_004	-	72.5591	0.182222	14.741	1.78205	0.103393	0.556072	2.23599	4.31849	2.64793	0.342746	99.3916
	UA 2614_005	-	74.1596	0.164655	14.3294	1.55226	0.064582	0.483984	1.96832	4.12284	2.58831	0.366012	99.7174	Hayes set H - unit F2
	UA 2614_006	-	72.723	0.209156	14.6478	1.64422	0.062963	0.519889	2.20336	5.89159	2.47034	0.377754	100.665
	UA 2614_007	-	72.6742	0.250895	14.0128	1.71123	0.099187	0.477998	2.11739	4.24573	2.60682	0.3984	98.5048	Hayes River section
	UA 2614_008	-	54.7185	0	28.7271	0.401494	0.026613	0.031383	11.0883	4.87557	0.143062	0.001484	100.013	Wallace et al. (2014); Davies et al. (2016)
	UA 2614_009	-	71.9529	0.240653	14.589	1.75902	0.108616	0.538595	2.13133	4.08291	2.47768	0.348397	98.1505
	UA 2614_010	-	74.505	0.125002	13.3057	1.33599	0.083726	0.383225	1.77972	3.83	2.82681	0.330924	98.4314	Analysed concurrently with unknown sample
	UA 2614_011	-	69.6666	0.252826	14.3545	1.67165	0.06733	0.490459	2.43328	3.67526	2.44639	0.313057	95.3007
	UA 2614_012	-	68.175	0.301515	14.303	2.03615	0.069602	0.642504	2.4087	4.40529	2.40521	0.606225	95.2164
	UA 2614_013	-	59.2487	0.14281	11.3301	1.45465	0.055426	0.392982	1.65441	3.65271	2.09979	0.690354	80.5662
	Casc13-131_001	-	73.4618	0.410554	12.886	1.81623	0.036744	0.384627	1.43872	4.44744	2.71963	0.178816	97.7402
	ID 3506_016	-	74.0012	0.024984	13.0765	1.6009	0.06065	0.023946	0.756868	4.09525	5.09919	0.33747	99.0008	Secondary standard
	ID 3506_017	-	74.2771	0.098515	13.0826	1.49079	0.087554	0.042844	0.696999	3.9058	5.05094	0.293204	98.9602
	ID 3506_018	-	75.8041	0.091195	13.1066	1.53705	0.126044	0.031612	0.726969	2.58931	5.09468	0.33425	99.3663
	ID 3506_019	-	74.8918	0.022067	13.1391	1.48486	0.07253	0.042867	0.682741	4.0277	5.21439	0.338538	99.8401
	ID 3506_020	-	74.3115	0.045602	13.0141	1.55973	0.063269	0.041948	0.708679	4.17925	5.03638	0.340105	99.2239
	Old Crow_016	-	71.0311	0.285318	12.2459	1.62684	0.083479	0.284132	1.4006	3.42469	3.42736	0.275332	94.0226	Secondary standard
	Old Crow_017	-	71.4382	0.276615	12.3913	1.56648	0	0.271147	1.34004	3.57417	3.40041	0.294096	94.486
	Old Crow_018	-	72.5107	0.250189	12.552	1.54982	0.069846	0.256755	1.37451	3.88444	3.45773	0.27257	96.1171
	Old Crow_019	-	71.5315	0.279741	12.5797	1.57716	0.064538	0.304346	1.39059	3.56247	3.46733	0.257744	94.957
	Old Crow_020	-	71.4221	0.26955	12.7284	1.57685	0.081992	0.279204	1.42171	3.91847	3.39417	0.28767	95.3152
Aug 24 2018	ID 3506	1	73.932	0.064254	13.139	1.54676	0.060579	0.046675	0.72653	4.14493	5.03906	0.331309	98.9563	Secondary standard
	ID 3506	2	73.8847	0.044665	12.9767	1.6023	0.067475	0.024811	0.724329	4.50903	5.10779	0.355875	99.2174
NaTDI 5-micron beam data	ID 3506	3	73.4565	0.087586	13.1234	1.48604	0.022424	0.012823	0.701497	4.19259	5.08694	0.334212	98.4286
Normalised data has Na corrected down (from ID 3506; not shown here)	ID 3506	4	73.7823	0.111143	13.1147	1.58225	0.036551	0.03251	0.715349	4.13086	5.12032	0.29986	98.8581
	ID 3506	5	73.2347	0.078516	13.1142	1.4872	0.062112	0.033442	0.700849	4.02729	5.10238	0.335734	98.1007
	Old Crow	1	71.5518	0.270952	12.5144	1.5241	0.052296	0.268192	1.44063	3.60233	3.58604	0.250925	95.005	Secondary standard
	Old Crow	2	70.6693	0.264924	12.4209	1.58769	0.01758	0.313643	1.39024	3.70288	3.43945	0.266373	94.0129
	Old Crow	3	70.874	0.242621	12.4655	1.5746	0.136943	0.306044	1.3562	3.80086	3.55148	0.253012	94.5042
	Old Crow	4	70.1228	0.335885	12.3777	1.52626	0.041081	0.162284	1.24271	4.60834	3.91961	0.265225	94.5419
	Old Crow	5	69.5903	0.282789	12.0824	1.54102	0.027179	0.233815	1.3446	3.46243	3.44862	0.249532	92.2064
	Casc13-93	1	71.6265	0.399139	14.301	1.88416	0.057521	0.441891	1.56789	5.19435	2.91954	0.172237	98.5254
	Casc13-93	2	98.89	0	0.000149	0.022231	0.029719	0.002854	0	0	0.022613	0.014332	98.9786
	Casc13-93	3	98.1364	0.011957	0.262163	0.023332	0	0.004764	0.009852	0	0.009061	0	98.4575
	Casc13-93	4	98.8417	0	0	0.030832	0.033781	0.008608	0.05962	0.148911	0	0.136319	99.229
	Casc13-93	5	59.4479	0.483523	13.7421	8.36466	0.34639	0.222517	0.850105	7.83701	3.94156	0.37369	95.5251
	Casc13-93	6	74.8178	0.263432	13.1718	1.53659	0.05964	0.286784	1.61332	4.80035	1.94529	0.133067	98.598
	Casc13-108	1	71.2668	0.379164	14.6961	2.26274	0.082379	0.703144	2.50778	4.82494	2.70333	0.189302	99.573	CL-96
	Casc13-108	2	74.9912	0.390889	13.217	1.74912	0.11	0.441384	1.88565	4.03928	2.89489	0.258977	99.9199
	Casc13-108	3	74.982	0.367203	13.5666	1.72321	0.079217	0.440862	1.85424	4.51491	2.89005	0.221042	100.589
	Casc13-108	4	74.875	0.430447	13.5051	1.91143	0.05205	0.454888	1.989	4.57753	2.81632	0.219553	100.782
	Casc13-108	5	74.7352	0.432037	13.4132	1.83051	0.09319	0.428565	2.02093	4.16435	2.81105	0.240565	100.115
	Casc13-108	6	70.8428	0.65864	13.3318	3.07053	0.067694	0.441829	1.81275	4.63669	3.56615	0.246885	98.6201
	Casc13-108	7	72.7502	0.430357	13.767	1.84901	0.075036	0.522307	2.08962	4.55866	2.76841	0.238875	98.9956
	Casc13-108	8	73.2943	0.449729	13.8362	1.92091	0.07176	0.474656	2.07655	4.78654	2.81602	0.24252	99.9144
	Casc13-108	9	72.2287	0.365423	14.1387	2.03793	0.072678	0.601937	2.24916	4.26091	2.62453	0.240279	98.766
	Casc13-108	10	77.1317	0.218617	11.5203	0.959274	0	0.11961	0.526826	4.17071	3.75928	0.268141	98.6139
	Casc13-108	11	74.5525	0.371527	13.2784	1.8602	0.070137	0.425927	1.92127	4.4295	2.79224	0.228481	99.8785
	Casc13-108	12	71.599	0.384284	14.9534	2.40519	0.100424	0.419589	1.46152	5.10077	3.25924	0.203323	99.8409
	Casc13-108	13	72.1885	0.361007	13.1811	1.7673	0.050395	0.435856	1.9392	4.35049	2.70821	0.222444	97.1543
	Casc13-108	14	72.0997	0.369954	13.4825	1.86516	0.083594	0.52865	2.0287	4.39435	2.71525	0.262032	97.7707
	Casc13-108	15	70.3203	0.42824	13.7544	2.04409	0.058944	0.500949	1.95336	5.24426	2.84562	0.242995	97.3384
	Casc13-108	16	72.8708	0.353606	13.1014	1.76017	0.075494	0.413195	1.98315	4.11962	2.87339	0.244152	97.7399
	Casc13-119	1	74.572	0.186611	12.9954	1.52359	0.046955	0.204763	1.61787	4.72775	1.95138	0.17517	97.962
	Casc13-119	2	74.1339	0.248305	12.8419	1.54601	0.059509	0.309542	1.58926	4.82638	2.03042	0.192404	97.7342
	ID 3506	1	73.5257	0.108826	12.9206	1.53961	0.099599	0.065419	0.684118	4.27999	5.13695	0.316767	98.606	Secondary standard
	ID 3506	2	73.061	0.10893	12.7786	1.52173	0.026243	0.038605	0.716541	3.99255	5.162	0.334	97.6648
	ID 3506	3	73.9161	0.08366	13.0813	1.5216	0.057624	0.042683	0.71842	4.3167	5.09331	0.36195	99.1116
	ID 3506	4	73.5336	0.073287	13.0541	1.56782	0.044998	0.013872	0.707307	3.80283	5.09704	0.324541	98.1462
	ID 3506	5	73.6969	0.074863	13.1003	1.63442	0.088489	0.059694	0.735014	4.15041	5.10512	0.346445	98.9135
	Old Crow	1	72.3855	0.305938	12.5642	1.61263	0.043301	0.311355	1.44701	3.67486	3.57268	0.23436	96.0989	Secondary standard
	Old Crow	2	73.4186	0.275037	12.5531	1.63145	0.072883	0.261151	1.47403	1.05188	2.90595	0.271455	93.8543
	Old Crow	3	72.4784	0.32498	12.7669	1.6178	0.015564	0.270362	1.44077	3.69181	3.56779	0.289013	96.3982
	Old Crow	4	72.9409	0.320864	12.6998	1.53856	0.02163	0.292037	1.43651	3.98168	3.62847	0.271341	97.0706
	Old Crow	5	65.3572	0.225862	11.1857	1.59568	0.033713	0.28729	1.27503	3.48227	3.35833	0.27121	87.0111
Oct 11 2018	ID 3506_001	1	74.2147	0.133628	13.1131	1.58058	0.045743	0.033537	0.690712	3.98086	5.27789	0.339769	99.3338	Secondary standard
	ID 3506_002	1	73.4306	0.078949	13.0352	1.52473	0.092649	0.024399	0.718616	4.01225	5.28262	0.287051	98.4222
NaTDI 5-micron beam data	ID 3506_003	1	73.6374	0.059213	13.139	1.47682	0.053075	0.056919	0.72215	4.1341	5.15475	0.342827	98.6988
No manual corrections applied to normalised data	ID 3506_004	1	72.4497	0.083463	12.9128	1.54702	0.039553	0.023422	0.719265	4.29202	5.06835	0.328732	97.3902
	ID 3506_005	1	72.724	0.025785	12.9306	1.50472	0.073611	0.037633	0.7015	4.24574	5.22307	0.350099	97.7378
	Old Crow_001	1	71.9279	0.286313	12.7782	1.53779	0.059615	0.304705	1.3712	3.51759	3.60363	0.305722	95.6236	Secondary standard
	Old Crow_002	1	70.8248	0.334269	12.3048	1.58225	0	0.260239	1.33754	3.63256	3.47898	0.288291	93.9786
	Old Crow_003	1	70.8884	0.29148	12.3381	1.52644	0.029004	0.267395	1.39303	3.92256	3.70607	0.275284	94.5757
	Old Crow_004	1	72.3552	0.26537	12.5066	1.49923	0.056269	0.277393	1.37792	4.20475	3.69365	0.221805	96.4082
	Old Crow_005	1	71.8371	0.252925	12.5329	1.60394	0.030559	0.275684	1.40367	3.9245	3.74263	0.216816	95.7718
	Casc13-12	1	74.1278	0.111425	12.7738	0.949994	0.033374	0.184175	1.20537	4.47836	3.29726	0.334942	97.4209	CL-0
	Casc13-12	2	74.3422	0.307994	12.0089	1.56022	0.064096	0.377338	1.89672	3.80666	1.84625	0.303606	96.4455
	Casc13-12	3	75.1816	0.181896	12.2666	1.03224	0.056347	0.30661	1.22261	3.89898	2.62904	0.170297	96.9078
	Casc13-12	4	72.407	0.308795	13.5925	1.92895	0.077088	0.486441	2.19746	4.1406	1.88475	0.193614	97.1735
	Casc13-12	5	76.0851	0.286728	12.0256	1.43119	0.019698	0.254136	1.13653	3.98941	2.91779	0.218456	98.3153
	Casc13-12	6	70.1795	0.181641	13.6811	1.2479	0.060689	0.340133	1.62301	4.3034	3.23933	0.305891	95.0935
	Casc13-12	7	73.6014	0.162275	13.4392	1.20346	0.042173	0.27204	1.29276	3.47873	5.0074	0.294431	98.7274
	Casc13-12	8	74.239	0.265638	10.9688	1.36294	0.05673	0.162677	0.708922	3.79309	3.19028	0.173036	94.8821
	Casc13-12	9	74.8504	0.253456	13.0475	1.47821	0.048047	0.277202	1.51247	4.5817	1.94755	0.160101	98.1205
	Casc13-12	10	73.4722	0.262232	13.5578	1.8366	0.092963	0.41987	2.13166	4.72954	1.96545	0.267951	98.6758
	Casc13-12	11	74.5697	0.179913	12.9335	1.60609	0.03983	0.279203	1.63806	4.98863	1.92676	0.170007	98.2933
	Casc13-12	12	74.9899	0.247734	13.1676	0.925267	0.0436	0.262416	1.11058	4.71249	2.97762	0.096865	98.5122
	Casc13-12	13	38.3504	0.379199	7.24422	3.17124	0.152301	1.47298	2.45996	1.52943	0.733862	0.717035	56.0488
	Casc13-12	14	52.4273	1.11874	13.52	7.45015	0.182942	2.35272	4.86246	3.15715	2.13325	0.282002	87.4231
	Casc13-12	15	69.679	0.234173	12.5819	1.07826	0.01828	0.276577	1.14193	4.25707	2.76853	0.187476	92.1809
	Casc13-12	16	70.1761	0.324795	14.4888	2.21315	0.075566	0.61547	2.2857	5.07869	2.02272	0.096568	97.3558
	Casc13-12	17	72.6726	0.281619	13.923	2.05617	0.110958	0.494375	2.32359	4.60338	1.93225	0.187221	98.5429
	Casc13-12	18	72.5165	0.325144	13.8227	2.0448	0.064621	0.451721	2.31555	4.22937	1.80032	0.277876	97.7858
	Casc13-12	19	73.8319	0.302707	13.5311	1.80287	0.073063	0.405256	1.83855	4.55845	1.9389	0.139858	98.391
	Casc13-12	20	73.3566	0.292695	13.1784	1.04808	0.044287	0.264011	1.10236	4.77147	3.03404	0.116757	97.1823
	Casc13-12	21	70.5925	0.460622	14.8602	2.37273	0.135801	0.494494	1.68314	5.37041	2.9326	0.252368	99.0979
	Casc13-12	22	71.998	0.171003	14.1926	1.51046	0.065086	0.403891	1.73025	4.68637	3.13375	0.313373	98.1341
	Casc13-12	23	74.9384	0.340435	11.956	1.63208	0.032559	0.280026	1.12652	4.60509	2.89109	0.190498	97.9497
	Casc13-12	24	75.9904	0.352721	12.2342	1.58465	0.037268	0.236855	1.17381	4.1739	2.94812	0.20677	98.892
	Casc13-12	25	68.2226	0.500129	14.3812	2.23235	0.19234	0.506927	1.6782	5.62282	3.01547	0.233345	96.5327
	Casc13-12	26	70.4401	0.438923	14.4476	2.42441	0.198766	0.482855	1.58525	5.38954	3.10096	0.214449	98.6745
	Casc13-12	27	70.5463	0.451453	14.736	2.22947	0.158886	0.481688	1.62497	5.79912	3.10691	0.201595	99.2909
	Casc13-12	28	69.1113	0.505682	14.4835	2.37335	0.163439	0.478171	1.57149	5.55622	3.0791	0.259962	97.5235
	Casc13-12	29	75.0213	0.105666	12.3673	0.941867	0.034143	0.214799	1.02933	3.582	3.2866	0.271772	96.7935
	Casc13-12	30	74.8704	0.052887	11.5552	1.08348	0.071161	0.031173	0.404199	3.35019	4.69196	0.077915	96.171
	Casc13-12	31	75.2084	0.378444	12.2012	2.23061	0.089043	0.480037	2.25836	3.83038	1.93892	0.176151	98.7518
	Casc13-12	32	63.4794	0.204105	11.5346	1.021	0.004719	0.261534	1.057	3.86871	2.52174	0.195695	84.1044
	Casc13-12	33	74.284	0.210337	13.4945	1.0394	0.035187	0.286283	1.15709	4.7475	2.87603	0.100693	98.2083
	Casc13-12	34	75.4139	0.127331	12.8811	0.633413	0.10567	0.108369	0.707696	4.58325	3.75402	0.140232	98.4233
	Casc13-12	35	70.024	0.489149	14.8556	2.25294	0.136313	0.459619	1.65178	5.18999	3.06845	0.202119	98.2843
	Casc13-12	36	72.586	0.409964	13.9558	2.01274	0.070856	0.513222	2.05253	4.43084	2.83288	0.188608	99.0108
	Casc13-12	37	70.9463	0.460629	15.0218	2.42597	0.140866	0.518344	1.71183	5.9949	3.01549	0.202222	100.393
	Casc13-12	38	72.9885	0.260822	13.0201	1.19208	0.038573	0.305257	1.19259	4.39707	2.88462	0.121826	96.374
	Casc13-12	39	76.0555	0.230465	12.1258	1.39112	0.071022	0.328971	1.81957	4.34513	1.62254	0.20378	98.148
	Casc13-14	1	75.8783	0.247517	12.2127	0.886883	0.036718	0.17841	0.788592	4.08739	3.21253	0.103375	97.6091	CL-2
	Casc13-14	2	70.6346	0.485505	14.3938	2.32135	0.096854	0.434006	1.46757	5.21739	3.27306	0.190097	98.4713
	Casc13-14	3	73.6934	0.35446	13.7196	1.90759	0.121827	0.455265	2.07649	5.14162	2.08497	0.241151	99.7419
	Casc13-14	4	72.4715	0.192705	13.9915	1.51393	0.04284	0.35613	1.68086	4.43823	3.18634	0.35943	98.1524
	Casc13-14	5	70.4774	0.42066	14.51	2.39326	0.103036	0.413596	1.45036	5.5315	3.35059	0.206372	98.8102
	Casc13-14	6	75.19	0.358268	11.0362	1.39019	0.071551	0.130374	0.754291	3.93069	3.16289	0.184985	96.1677
	Casc13-14	7	69.6172	0.500767	14.8853	2.36183	0.12761	0.499754	1.65504	5.60879	2.93789	0.211824	98.3582
	Casc13-14	8	68.2842	0.828428	14.6893	3.59087	0.166792	0.825957	2.29181	4.99274	3.00149	0.150227	98.7879
	Casc13-14	9	70.0894	0.446294	14.7466	2.40335	0.14415	0.576896	1.61285	5.46071	2.94864	0.174764	98.5643
	Casc13-14	10	74.2989	0.235117	13.0987	1.50224	0.033154	0.283685	1.52921	4.96172	1.97677	0.139968	98.0279
	Casc13-14	11	75.1919	0.103321	11.7158	1.00513	0.062546	0.13379	0.838743	3.77588	3.31256	0.355088	96.4146
	Casc13-14	12	74.666	0.260858	12.9582	1.47802	0.105834	0.276043	1.6018	4.66409	1.93325	0.169484	98.0753
	Casc13-14	13	75.9998	0.083623	12.305	0.526157	0.070377	0.081079	0.638989	4.27243	3.80239	0.104101	97.8604
	Casc13-14	14	70.258	0.495995	15.0867	2.29409	0.144507	0.533019	1.70723	5.25033	3.01477	0.238667	98.9694
	Casc13-14	15	74.6355	0.19396	12.8151	1.56615	0.079004	0.301945	1.59502	4.88439	1.97664	0.18795	98.1933
	Casc13-14	16	70.5293	0.43943	14.4447	2.51295	0.112956	0.417951	1.46718	5.30536	3.22315	0.202135	98.6095
	Casc13-14	17	70.664	0.433101	14.8715	2.43191	0.147511	0.462305	1.6022	5.55015	3.11532	0.248213	99.4702
	Casc13-14	18	71.1871	0.225303	14.1634	1.44577	0.007544	0.373254	1.82797	4.39773	3.03915	0.320183	96.9152
	Casc13-14	19	70.4436	0.499734	15.0816	2.40822	0.095649	0.448892	1.61715	5.27388	3.16937	0.202935	99.1953
	Casc13-14	20	73.261	0.335774	13.6811	1.99479	0.117744	0.452044	2.36319	4.70898	1.98806	0.253388	99.0989
	Casc13-14	21	72.5496	0.303809	13.6222	1.95679	0.099293	0.440831	2.2786	4.55703	1.98379	0.256199	97.9904
	Casc13-14	22	70.3433	0.441108	15.1101	2.38148	0.126035	0.52828	1.66269	5.26754	2.91339	0.184768	98.9169
	Casc13-14	23	71.7589	0.208989	14.1712	1.46929	0.040089	0.392988	1.72892	4.59299	2.95531	0.303182	97.5535
	Casc13-14	24	74.6399	0.08437	12.2507	0.448899	0.137544	0.078197	0.621992	3.89927	3.908	0.091548	96.1398
	Casc13-14	25	70.0967	0.19378	14.0366	1.50463	0.036302	0.346616	1.76814	4.20745	2.92422	0.29211	95.3407
	Casc13-14	26	72.7913	0.181757	13.9001	1.41821	0.085245	0.323114	1.60891	4.316	3.09875	0.328976	97.9782
	Casc13-14	27	72.4193	0.4128	12.4522	1.63722	0.068844	0.316133	1.39174	3.8598	2.91977	0.148099	95.5925
	Casc13-14	28	70.9546	0.243367	12.1812	1.49797	0.011006	0.277927	1.3034	3.51818	3.48042	0.256015	93.6664
	Casc13-14	29	73.2113	0.402083	12.5391	1.68606	0.081444	0.34339	1.40425	4.35478	2.99821	0.184019	97.1631
	Casc13-14	30	72.5711	0.198235	13.4541	1.30279	0.036294	0.449935	1.75176	3.97713	2.43031	0.235707	96.3542
	Casc13-14	31	70.6737	0.478871	15.0413	2.30076	0.179845	0.566374	1.73696	5.44273	3.08492	0.231469	99.6847
	Casc13-14	32	75.0446	0.418212	12.2069	2.06621	0.101057	0.399361	2.22619	3.71397	1.92103	0.166514	98.2264
	Casc13-14	33	75.2048	0.449574	12.0639	2.16532	0.133796	0.464663	2.15044	3.76901	1.96664	0.131977	98.4703
	Casc13-14	34	73.6714	0.295441	12.7554	1.57714	0.064577	0.365431	1.77603	4.93099	1.99666	0.157396	97.5549
	Casc13-14	35	70.4814	0.423578	14.9787	2.2377	0.168175	0.539373	1.66404	5.35084	3.04116	0.207867	99.0459
	Casc13-14	36	73.8088	0.286397	13.3413	1.81444	0.150437	0.422151	1.9907	4.63956	1.96154	0.273201	98.6268
	Casc13-14	37	68.7314	0.416372	14.4866	2.25546	0.128316	0.467775	1.6457	5.33979	2.8914	0.264593	96.5677
	Casc13-14	38	68.8116	0.329863	13.7682	2.09557	0.053098	0.307123	1.17622	5.3961	3.3231	0.208966	95.4226
	Casc13-14	39	69.3703	0.445409	14.8673	2.29513	0.124265	0.491466	1.68392	5.23626	2.929	0.26185	97.6458
	UA 1364	1	76.8365	0.362757	11.9994	1.64518	0.030749	0.243901	1.15589	3.97328	3.03181	0.214782	99.4457	Novarupta-Katmai 1912
	UA 1364	2	78.5464	0.129685	12.1659	1.20983	0.018806	0.115206	0.708001	4.28475	3.09305	0.233105	100.452
	UA 1364	3	69.3973	0.60198	14.4689	3.64435	0.071957	1.03399	3.1464	4.65632	2.46916	0.15771	99.6124	Kodiak Island, station 07JANV-2
	UA 1364	4	68.4001	0.71177	14.6523	3.97504	0.101076	1.01233	3.32542	4.0472	2.41746	0.165386	98.7708	Davies et al. (2016)
	UA 1364	5	76.7997	0.273663	12.7551	1.33155	0.069764	0.214457	1.27564	4.36725	2.94888	0.181658	100.177
	UA 1364	6	78.5321	0.16503	12.1477	1.10688	0	0.118608	0.687585	4.25327	3.09671	0.236323	100.291	Analysed concurrently with unknown sample
	UA 1364	7	73.2821	0.349392	11.6515	1.69273	0.025474	0.300727	1.16324	4.47641	2.84918	0.192583	95.9399
	UA 1364	8	68.7834	0.687177	14.9129	3.70551	0.099735	1.10333	3.65113	4.47197	2.40796	0.155819	99.9437
	UA 1364	9	76.8534	0.354448	12.3203	1.66344	0.035426	0.255728	1.20077	3.9894	2.98153	0.17662	99.7913
	UA 1364	10	74.9174	0.174374	11.5548	1.208	0.092176	0.081691	0.691263	4.55397	3.10255	0.216399	96.5438
	UA 1364	11	77.8324	0.327839	12.5045	1.29288	0.039973	0.221204	1.17667	3.60183	3.10708	0.211026	100.268
	UA 1364	12	77.3608	0.247433	11.9984	1.26909	0.048257	0.17605	0.997281	3.97964	3.21397	0.19322	99.4405
	UA 1364	13	76.5652	0.356446	12.7509	1.56401	0.046339	0.283614	1.38149	4.63301	3.05447	0.182112	100.777
	UA 1364	14	76.2499	0.368622	12.3849	1.65598	0.057462	0.279406	1.27244	3.82144	3.03877	0.204695	99.2874
	UA 1364	15	77.4105	0.198937	12.1259	1.24357	0.044726	0.152002	0.80386	4.36738	3.23531	0.195682	99.7337
	UA 2754	1	53.3127	0.02285	28.1502	0.593631	0.02953	0.06551	11.3339	4.66718	0.226254	0.016777	98.4147	Redoubt 1989-90
	UA 2754	2	46.0429	1.83425	8.29047	13.0526	0.502715	14.2176	10.7962	1.96668	0.458221	0.108448	97.2456
	UA 2754	3	77.4039	0.294816	11.9571	1.0955	0.061548	0.138203	0.85364	3.71951	3.54402	0.119551	99.1608	Seismic station RDN, Alaska
	UA 2754	4	79.0481	0.246543	11.8474	0.572913	0.025828	0.091763	0.159127	3.18764	3.99647	0.103432	99.2558	Davies et al. (2016)
	UA 2754	5	54.0084	0.031993	27.7002	0.551456	0.021978	0.007192	10.787	5.27921	0.214264	0.004582	98.6052
	UA 2754	6	76.7275	0.241783	12.1914	1.02378	0.09235	0.139979	1.00335	3.38709	3.69408	0.132713	98.6041	Analysed concurrently with unknown sample
	UA 2754	7	56.4198	0.057795	25.1728	0.61053	0	0.042389	7.54122	6.5687	0.634587	0	97.0479
	UA 2754	8	78.0759	0.273746	11.8099	1.03843	0.095695	0.120995	0.798376	3.72321	3.58262	0.128185	99.6182
	UA 2754	9	76.627	0.293539	12.7445	1.02643	0.036951	0.083729	1.14839	4.39054	3.35188	0.102495	99.7823
	UA 2754	10	76.4599	0.196354	12.5612	0.86298	0	0.055023	1.12268	4.20016	3.28717	0.073058	98.8021
	UA 2754	11	77.1622	0.199398	12.2619	0.937263	0.080334	0.1395	1.0212	3.94104	3.69541	0.129702	99.5387
	UA 2754	12	50.7267	0.051831	26.0354	0.259742	0.003075	0.047254	8.89046	5.28432	0.1529	0	91.4516
	UA 2754	13	76.5206	0.305726	12.6013	1.09231	0.062303	0.17827	1.08003	3.89622	3.26595	0.088566	99.0713
	UA 2754	14	76.8228	0.208414	12.0242	1.00474	0.057795	0.186243	1.00115	3.8379	3.46236	0.117284	98.6964
	UA 2754	15	75.7473	0.276484	13.1256	1.34533	0.073576	0.243754	1.39576	3.94223	3.38701	0.137966	99.6439
	ID 3506_006	1	73.776	0.141118	13.1466	1.5736	0.077448	0.041965	0.708688	4.3569	5.35554	0.333047	99.4358	Secondary standard
	ID 3506_007	1	74.0051	0.092459	12.992	1.58184	0.087745	0.0194	0.743016	4.14201	5.14198	0.321325	99.0544
	ID 3506_008	1	73.9618	0.077206	13.0604	1.57449	0.118968	0.041724	0.706336	3.83346	5.11582	0.344073	98.7567
	ID 3506_009	1	73.8956	0.092218	13.1424	1.54292	0.067983	0.030536	0.685661	4.1438	5.19176	0.324291	99.044
	ID 3506_010	1	73.9905	0.098131	13.1182	1.47573	0.041577	0.05385	0.705002	4.1923	5.07446	0.344614	99.0166
	Old Crow_006	1	71.3907	0.324021	12.4432	1.63356	0.045523	0.268721	1.34064	3.57458	3.69026	0.219579	94.8812	Secondary standard
	Old Crow_007	1	70.8282	0.298185	12.3822	1.5294	0.054159	0.284516	1.41061	3.54605	3.57912	0.239345	94.0978
	Old Crow_008	1	71.4234	0.30853	12.441	1.52932	0.044044	0.267084	1.4216	3.56372	3.72044	0.276637	94.9333
	Old Crow_009	1	72.2631	0.29931	12.5419	1.51897	0.04051	0.30564	1.36657	3.80163	3.53678	0.268244	95.8821
	Old Crow_010	1	72.239	0.29762	12.4685	1.6046	0.064358	0.25883	1.35099	3.60022	3.54977	0.271934	95.6445
	Casc13-16	1	72.8203	0.318053	13.7585	2.05512	0.078108	0.415495	2.17914	4.90314	1.87234	0.20246	98.557	CL-4
	Casc13-16	2	72.754	0.441143	13.5668	1.72936	0.133249	0.17766	1.09477	5.18963	3.47793	0.189803	98.7115
	Casc13-16	3	62.9382	0.010533	21.4663	0.243098	0.007253	0.005119	4.62796	7.29178	0.840153	0.030576	97.454
	Casc13-16	4	70.8447	0.479163	14.7347	2.41171	0.212906	0.54665	1.58886	5.88823	3.14677	0.203139	100.011
	Casc13-16	5	62.7804	0.789736	15.4663	5.67269	0.170351	1.16021	3.36714	4.98031	2.60679	0.230237	97.1722
	Casc13-16	6	70.1828	0.410618	14.9708	2.29221	0.108839	0.537993	1.64197	5.60147	3.05725	0.239177	98.9892
	Casc13-16	7	70.1211	0.472208	14.7257	2.2012	0.163305	0.526993	1.65617	5.59648	3.0939	0.210164	98.7199
	Casc13-16	8	68.1603	0.307693	15.7841	2.23597	0.045819	0.821073	3.36016	4.77948	1.88904	0.326334	97.6363
	Casc13-16	9	70.0198	0.493183	14.8858	2.39295	0.115671	0.519317	1.65491	5.87578	2.89048	0.194992	98.9988
	Casc13-16	10	65.0242	1.11016	15.15	4.62177	0.057349	1.34152	4.06468	4.39039	2.61843	0.077419	98.4385
	Casc13-16	11	70.3558	0.466862	14.7573	2.36127	0.132182	0.479964	1.70253	4.96724	2.96479	0.236564	98.3711
	Casc13-16	12	54.8019	0.105742	26.5972	0.754876	0.018271	0.063272	9.88927	5.07012	0.581077	0.023486	97.9
	Casc13-16	13	74.0665	0.299602	13.5228	1.87477	0.110951	0.403218	2.07755	4.92633	2.00325	0.210025	99.4476
	Casc13-16	14	74.8158	0.138949	12.9909	1.0542	0.090243	0.195457	1.16728	4.01949	3.2339	0.316634	97.9514
	Casc13-16	15	67.1073	0.569653	15.3638	3.33517	0.146926	1.16306	3.16544	4.79234	2.41592	0.149984	98.1757
	Casc13-16	16	71.1555	0.480639	15.071	2.37009	0.102365	0.455213	1.65458	5.847	3.11824	0.222739	100.427
	Casc13-16	17	75.2919	0.154533	13.0348	0.641353	0.123493	0.091318	0.670798	4.27008	3.76481	0.092716	98.1149
	Casc13-16	18	55.9156	0.065086	12.2467	1.10463	0.04754	0.126943	0.639177	3.04837	3.88354	0.397384	77.3854
	Casc13-16	19	74.646	0.074409	12.8625	0.40241	0.080487	0.020257	0.725746	3.93116	4.34806	0.057966	97.1359
	Casc13-16	20	73.5476	0.187892	12.085	1.30101	0.088021	0.200221	1.28346	4.23414	2.07731	0.148866	95.1199
	Casc13-16	21	70.6466	0.500255	14.9901	2.35577	0.147175	0.501428	1.70645	5.45582	3.06937	0.221858	99.5447
	Casc13-16	22	66.8057	0.567004	15.6105	3.84328	0.122723	1.0048	3.1345	5.01931	2.69037	0.335989	99.0584
	Casc13-16	23	70.5469	0.565532	14.894	2.35846	0.148912	0.470198	1.59458	5.9382	3.09664	0.199629	99.7679
	Casc13-16	24	66.1313	0.499908	14.9727	3.5999	0.084475	0.728046	2.16912	4.7515	4.06848	0.258461	97.2056
	Casc13-16	25	70.2518	0.514735	14.8476	2.31398	0.191037	0.477389	1.75268	5.36437	3.10217	0.229868	98.9938
	Casc13-16	26	75.5343	0.232454	12.193	1.43007	0.051566	0.372487	1.97539	4.0386	1.69327	0.237736	97.7053
	Casc13-16	27	73.4616	0.182369	14.1607	1.34411	0.071168	0.288608	1.61126	4.24755	3.07991	0.27882	98.6631
	Casc13-16	28	70.359	0.490772	14.9395	2.38222	0.125546	0.497371	1.61575	5.70516	3.01877	0.21389	99.2997
	Casc13-16	29	76.6995	0.103516	11.5307	0.941187	0.058955	0.143384	0.726427	3.53236	3.37313	0.320104	97.3571
	Casc13-16	30	70.725	0.457704	14.53	2.40193	0.128197	0.40828	1.44197	4.90961	3.25611	0.158392	98.3815
	Casc13-16	31	73.7823	0.112662	12.7685	0.725579	0.145364	0.13683	0.694848	4.19571	3.74741	0.12649	96.4071
	Casc13-16	32	65.4218	0.320349	18.7587	1.4563	0.090926	0.293701	3.66887	6.60533	2.00332	0.120289	98.7124
	Casc13-16	33	69.608	0.513601	14.8374	2.34148	0.173712	0.533424	1.58405	5.44343	3.0108	0.200789	98.2013
	Casc13-16	34	69.8589	0.418273	14.343	2.43142	0.141164	0.36726	1.45851	4.94357	3.17618	0.209354	97.3003
	Casc13-16	35	70.5388	0.465331	15.0364	2.36402	0.15888	0.544479	1.78036	5.3651	3.00824	0.215487	99.4284
	Casc13-19	1	47.2309	0.039639	6.88114	0.376805	0.053178	0.04046	0.253464	2.0943	3.73178	1.75363	62.0596	CL-7
	Casc13-19	2	58.5869	0.364719	12.4436	2.1687	0.113851	0.407112	1.33152	5.13934	2.52321	0.528788	83.4884
	Casc13-19	3	70.156	0.484235	14.7705	2.30919	0.15367	0.511388	1.64572	5.64837	2.94324	0.239084	98.8075
	Casc13-19	4	70.1912	0.480966	14.7731	2.49435	0.056751	0.817983	2.5359	4.76909	2.6877	0.163234	98.9334
	Casc13-19	5	64.283	0.994789	14.8951	6.37873	0.1835	1.18755	3.27915	4.96691	2.42176	0.240871	98.777
	Casc13-19	6	67.9069	0.6049	14.8604	3.45996	0.081304	0.770646	2.0597	4.8418	4.31411	0.217641	99.0683
	Casc13-19	7	70.147	0.504194	14.8717	2.28473	0.164299	0.545302	1.67776	5.48525	3.02893	0.19554	98.8606
	Casc13-19	8	71.9199	0.278871	14.7412	1.67373	0.034226	0.436049	2.09776	4.59072	3.13511	0.318204	99.154
	Casc13-19	9	74.8402	0.248528	13.0208	1.53768	0.030245	0.280512	1.63113	4.67598	1.97305	0.137827	98.3449
	Casc13-19	10	76.0837	0.263349	12.8142	1.46724	0.110812	0.25292	1.42118	4.84311	1.97957	0.137785	99.3427
	Casc13-19	11	98.7415	0	0.122474	0.082905	0	0.004905	0.010022	0.018567	0.002326	0.030574	99.0064
	Casc13-19	12	74.5165	0.300706	13.1261	1.57314	0.071388	0.312351	1.54184	4.93771	1.97564	0.173705	98.4898
	Casc13-19	13	74.1181	0.1145	12.2922	0.987851	0.040045	0.186587	0.979376	3.62398	3.33941	0.318668	95.9289
	Casc13-19	14	73.2204	0.108518	12.4922	0.637022	0.088535	0.10401	0.690187	4.03861	3.76151	0.131278	95.2426
	Casc13-19	15	70.0407	0.460495	14.8885	2.25945	0.119082	0.551748	1.72301	5.82407	3.16122	0.197782	99.1814
	Casc13-19	16	67.5716	0.049553	19.3383	0.006498	0.006785	0.015702	0.108037	11.515	0.017239	0.032422	98.6538
	Casc13-19	17	72.9116	0.148944	13.6993	1.50479	0.07231	0.459432	2.08033	4.2792	2.19071	0.232521	97.5267
	Casc13-19	18	62.0176	0.040682	23.7471	0.261902	0	0.02885	5.52682	7.89024	0.537688	0.007635	100.057
	Casc13-19	19	57.201	0.415167	12.194	2.29828	0.12298	0.50929	1.38435	4.63128	2.50277	0.62854	81.7458
	Casc13-19	20	74.4905	0.209102	12.8413	1.55445	0.063678	0.303146	1.58798	4.81048	1.96775	0.132254	97.9308
	Casc13-19	21	74.7651	0.191137	13.033	1.53883	0.089933	0.322784	1.58887	4.89838	2.0623	0.140738	98.5994
	Casc13-19	22	70.4217	0.452163	15.0763	2.33983	0.154547	0.498677	1.72918	5.00966	3.17234	0.198096	99.0078
	Casc13-21	1	71.2517	0.392323	14.6734	2.34708	0.141086	0.452622	1.39644	5.74259	3.33809	0.188345	99.8812
	Casc13-21	2	75.9471	0.199292	12.7853	1.32468	0.058473	0.376873	2.25697	3.8451	1.55628	0.10337	98.4301
	Casc13-21	3	64.4299	0.86776	15.7297	5.9894	0.188596	1.18968	3.33769	4.7905	2.6766	0.19987	99.3546
	Casc13-21	4	68.5079	0.049999	12.3533	0.428801	0.026814	0.033349	0.699157	3.47805	3.99234	0.255647	89.7677
	Casc13-21	5	74.6838	0.04852	13.4369	0.474919	0.06756	0.042515	0.762158	3.81028	4.47141	0.078607	97.8589
	Casc13-24	1	69.2643	0.555455	14.6292	3.45939	0.138349	0.620783	1.93857	5.34333	3.15052	0.141812	99.2097
	Casc13-24	2	68.6729	0.410709	14.5496	2.23725	0.172263	0.458225	1.58912	5.68811	2.91801	0.253784	96.8927
	Casc13-24	3	73.18	0.247031	13.7775	1.56446	0.028033	0.394551	1.49402	3.95776	3.27905	0.312446	98.1643
	Casc13-24	4	76.825	0.156298	12.2841	1.08679	0.072678	0.118566	1.04255	4.36844	2.38036	0.23806	98.5191
	Casc13-24	5	73.9469	0.301551	13.4781	1.97406	0.106799	0.426733	2.2067	4.56332	1.96437	0.27293	99.1799
	Casc13-24	6	75.1552	0.318757	11.1501	1.3657	0.089222	0.109762	0.664327	4.16646	3.23774	0.178142	96.3952
	Casc13-24	7	70.5048	0.924042	12.1381	3.07439	0.057673	0.465934	1.50678	4.1624	4.02262	0.059194	96.9025
	Casc13-24	8	74.3951	0.300489	13.2298	1.62968	0.044387	0.33146	1.70695	4.60545	1.89462	0.162817	98.2639
	Casc13-24	9	67.9199	0	19.0712	0.025156	0	0	0.076577	11.7538	0.062618	0.000779	98.9099
	Casc13-27	1	73.6718	0.09591	12.7499	0.616289	0.079214	0.109608	0.690078	4.60949	3.68527	0.117827	96.3988
	Casc13-27	2	72.7911	0.214363	14.1106	1.37251	0.024333	0.324278	1.5821	4.74961	3.14094	0.324139	98.5608
	Casc13-27	3	70.217	0.50935	14.8887	2.28805	0.122433	0.529372	1.63354	5.90729	2.86612	0.208467	99.1233
	Casc13-27	4	73.7527	0.337297	13.5801	1.9103	0.117448	0.439678	2.18568	4.36112	2.08735	0.270408	98.981
	Casc13-27	5	75.6299	0.21923	12.0425	1.33607	0.064103	0.255907	0.76404	3.65272	3.83129	0.315493	98.0401
	ID 3506_011	1	74.1274	0.089819	12.8739	1.56026	0.038289	0.040096	0.753373	4.06155	5.2131	0.340509	99.0214	Secondary standard
	ID 3506_012	1	74.2172	0.0898	13.0035	1.61477	0.04419	0.059659	0.725484	4.12262	5.21956	0.355901	99.3724
	ID 3506_013	1	73.6218	0.092849	13.0005	1.60175	0.067824	0.022602	0.720869	3.87457	5.19874	0.338937	98.4639
	ID 3506_014	1	74.2367	0.047192	13.0544	1.54611	0.024579	0.038085	0.729198	4.3053	5.18064	0.319693	99.4098
	ID 3506_015	1	73.5696	0.059348	12.9802	1.51394	0.09592	0.049419	0.716324	4.30188	5.12814	0.331159	98.6713
	Old Crow_011	1	72.5993	0.319372	12.561	1.6673	0.066155	0.301744	1.38096	3.53155	3.71169	0.302297	96.3731	Secondary standard
	Old Crow_012	1	71.4753	0.259947	12.3908	1.58262	0.068494	0.27381	1.31406	3.50727	3.44148	0.245173	94.5036
	Old Crow_013	1	71.3843	0.276449	12.6003	1.6249	0.098164	0.320141	1.39579	3.62137	3.6568	0.25867	95.1784
	Old Crow_014	1	72.3188	0.297458	12.55	1.54616	0.065547	0.285076	1.32152	3.83023	3.47803	0.266339	95.899
	Old Crow_015	1	72.5304	0.272784	12.5077	1.60502	0.04591	0.310138	1.30006	3.72357	3.56011	0.215078	96.0223
	Casc13-33	1	73.4291	0.344763	14.343	1.43277	0.05171	0.397434	1.52266	5.38029	2.65952	0.111737	99.6478
	Casc13-33	2	71.7075	0.293035	13.9099	1.41241	0.039201	0.402867	1.59605	4.75406	2.70463	0.128486	96.9191
	Casc13-33	3	1.15346	0.056594	0.333906	0.165244	0.009687	0.011299	0.186271	0.00274	0.001129	0.260708	2.1222
	Casc13-36	1	67.2234	0.049682	19.8748	0.043425	0	0.014724	0.751321	11.5468	0.126252	0.003859	99.6335	CL-24
	Casc13-36	2	75.39	0.194721	11.6169	0.889109	0.031638	0.083991	0.606401	3.65294	3.72963	0.308918	96.4346
	Casc13-36	3	75.7221	0.179496	11.9302	0.927621	0.111012	0.08107	0.70167	3.86661	3.74433	0.292533	97.4906
	Casc13-36	4	65.4133	0.141708	9.95068	0.877821	0.019907	0.160722	0.665396	3.12457	2.21578	0.356347	82.8459
	Casc13-36	5	26.8111	0.342638	17.0092	3.24445	0.033974	0.918265	0	0.221426	6.17779	1.29492	55.7615
	Casc13-36	6	72.5398	0.064909	12.4163	0.451183	0.055252	0.043466	0.763144	3.87024	4.49564	0.111087	94.7859
	Casc13-36	7	74.7338	0.060392	13.1029	0.399175	0.047062	0.044448	0.762951	3.98113	4.69502	0.088108	97.8951
	Casc13-43	1	70.8049	0.47874	14.9206	2.36924	0.143298	0.533099	1.65434	5.92248	3.11511	0.188603	100.088	CL-31
	Casc13-43	2	74.1238	0.096549	12.6707	0.570657	0.129714	0.119597	0.687031	4.24802	3.77846	0.131254	96.5261
	Casc13-43	3	75.4044	0.117692	12.971	0.620681	0.045898	0.1064	0.67213	4.29861	3.82723	0.109023	98.1484
	Casc13-43	4	73.6387	0.377801	13.1562	1.70575	0.079515	0.490718	1.85379	4.3874	2.7384	0.183903	98.5706
	Casc13-43	5	68.2927	1.11132	13.8334	3.93703	0.028667	1.12207	2.84092	4.15212	3.20783	0.103378	98.606
	Casc13-43	6	67.5585	1.19449	14.0099	4.30976	0.048	1.0744	2.82388	4.12966	3.30311	0.054698	98.4941
	Casc13-43	7	76.1407	0.108653	12.7487	1.02053	0.033734	0.178759	1.1336	4.16442	3.23735	0.288116	98.9896
	Casc13-43	8	76.0113	0.138923	11.6198	0.954919	0.037505	0.113717	0.798146	3.95846	3.40218	0.286066	97.2564
	Casc13-43	9	77.2768	0.11332	12.6308	1.00447	0.066847	0.138191	0.977645	4.07318	3.3493	0.300072	99.8629
	Casc13-43	10	76.234	0.264497	12.658	1.09615	0.060064	0.219799	1.07973	3.95653	3.57276	0.143814	99.2529
	Casc13-43	11	76.9625	0.163353	11.1054	1.23088	0.07185	0.210193	0.453981	3.37109	3.93387	0.317265	97.7487
	Casc13-43	12	65.1612	0.074172	19.1699	0.575716	0	0.163728	3.94769	7.06362	1.45972	0.111269	97.7018
	Casc13-43	13	100.407	0.042653	0.025608	0	0.037401	0	0.006125	0	0.010501	0.017318	100.543
	Casc13-43	14	75.794	0.133472	12.1045	1.00836	0.093697	0.115126	0.894386	3.69791	3.37684	0.311209	97.4593
	Casc13-43	15	76.0828	0.110815	11.696	1.03536	0.026387	0.114906	0.76308	3.32686	3.44756	0.309985	96.8437
	Casc13-43	16	74.1414	0.296883	13.5304	1.87484	0.136526	0.421972	2.06174	4.96398	2.08331	0.240095	99.697
	Casc13-43	17	71.3257	0.47192	15.1016	2.33147	0.117555	0.533292	1.67084	6.03227	3.05651	0.226955	100.817
	Casc13-43	18	75.0409	0.379835	12.3549	1.11755	0.062268	0.203862	1.09383	3.94813	3.28573	0.161621	97.6121
	Casc13-134/36	1	67.3619	0.071237	19.6219	0.051398	0	0	0.491103	12.5492	0.07394	0.006216	100.226
	Casc13-144/46	1	74.0737	0.249097	12.8281	1.51012	0.00236	0.318094	1.56731	4.35026	1.8818	0.148092	96.8954
	Casc13-144/46	2	68.2087	0.001517	19.2125	0.024084	0.031382	0	0.011822	11.6831	0.037064	0.008567	99.2168
	ID 3506_016	1	74.4425	0.073006	13.1651	1.55627	0.04482	0.061763	0.731132	4.20397	5.16753	0.364598	99.7284	Secondary standard
	ID 3506_017	1	74.1955	0.092807	13.0181	1.57089	0.064415	0.046325	0.71956	4.06248	5.33008	0.332966	99.358
	ID 3506_018	1	74.3081	0.07759	13.0909	1.60825	0.075981	0.057766	0.732839	4.34277	5.21549	0.347691	99.7789
	ID 3506_019	1	74.3859	0.121738	13.1033	1.6055	0.08332	0.052555	0.728265	4.13691	5.10107	0.360987	99.598
	ID 3506_020	1	73.9982	0.098917	13.0932	1.57614	0.105279	0.05046	0.679979	4.01702	5.0581	0.32714	98.9306
	Old Crow_016	1	72.3761	0.316504	12.6441	1.64274	0.079115	0.290138	1.39538	3.56703	3.58128	0.292981	96.1192	Secondary standard
	Old Crow_017	1	71.8786	0.25714	12.434	1.67463	0.055263	0.305828	1.3323	4.13855	3.50103	0.255156	95.7749
	Old Crow_018	1	73.9379	0.318061	12.8068	1.82476	0.018658	0.291252	1.45332	4.05374	3.7719	0.296753	98.7061
	Old Crow_019	1	72.1513	0.305945	12.5625	1.6619	0.073464	0.254831	1.44405	3.84754	3.59262	0.267485	96.1013
	Old Crow_020	1	72.3367	0.316664	12.6177	1.59325	0.067334	0.280509	1.3651	3.8657	3.58355	0.250574	96.2206
	Old Crow_021	1	71.58	0.309042	12.34	1.5725	0.089543	0.234043	1.36357	3.75708	3.42035	0.287761	94.889
Nov 16 2018	ID3506_014	1	73.004	0.033591	13.0362	1.56568	0.049774	0.030577	0.673835	3.90906	5.31189	0.348529	97.8845	Secondary standard
	ID3506_015	1	73.2095	0.080598	13.0199	1.60914	0.073251	0.035708	0.693809	4.00774	5.05204	0.320583	98.0298
No TDI applied (10-micron beam data)	ID3506_016	1	72.9671	0.118667	12.7902	1.56893	0.101191	0.056124	0.75797	3.99347	5.0125	0.345282	97.6335
Normalised data has Na corrected up and K corrected down (from ID 3506; not shown here)	Old Crow_014	1	71.661	0.320203	12.5198	1.52758	0.076587	0.280275	1.37011	3.14691	3.52227	0.26836	94.6325	Secondary standard
	Old Crow_015	1	68.4978	0.29542	12.0225	1.62566	0.057059	0.31084	1.34602	3.84963	3.59988	0.244363	91.794
	Old Crow_016	1	72.4338	0.297736	12.695	1.59032	0.056371	0.309569	1.39458	4.09603	3.49775	0.262658	96.5745
	UA 3286	1	74.3975	0.161994	13.0412	0.678145	0.082948	0.143208	0.751728	4.02723	3.89923	0.100809	97.2612
	UA 3286	2	73.9301	0.107973	12.8498	0.605966	0.142047	0.102564	0.753243	4.04825	3.93388	0.150574	96.5905	Opala (1400 cal BP caldera formation)
	UA 3286	3	75.2235	0.065224	13.1583	0.651705	0.159468	0.142046	0.791097	3.98755	3.876	0.090602	98.125
	UA 3286	4	74.8431	0.14388	12.9296	0.656859	0.121257	0.093258	0.730691	3.88135	3.82897	0.10076	97.307	OP-22-U (Phase III), 2.5km north of Opala
	UA 3286	5	73.6596	0.14834	12.8038	0.690402	0.111804	0.122821	0.755654	4.02183	3.84419	0.128982	96.2583	Andrews et al. (2018)
	UA 3286	6	76.0566	0.114651	12.8633	0.637095	0.095807	0.137782	0.68732	3.9452	3.97635	0.116582	98.6043
	UA 3286	7	74.807	0.179789	13.0106	0.644555	0.112964	0.093227	0.781092	3.91173	3.81813	0.093916	97.4318	Not analysed concurrently with unknown sample
	UA 3286	8	74.9005	0.14382	13.0503	0.698897	0.080476	0.119645	0.752704	4.02424	3.85708	0.109743	97.7127
	UA 3286	9	73.441	0.1101	12.9369	0.708629	0.107528	0.13189	0.755819	4.02829	3.76017	0.115394	96.0696
	UA 3286	10	74.871	0.175292	13.066	0.632525	0.156964	0.111483	0.753179	3.94091	3.82331	0.08713	97.5981
	UA 3286	11	74.4011	0.107895	12.8077	0.661909	0.121901	0.135718	0.720839	3.79731	4.01471	0.06109	96.8164
	UA 3286	12	73.5933	0.098895	13.1283	0.677224	0.184046	0.148171	0.771463	4.03818	3.76771	0.086007	96.4739
	UA 3286	13	74.4584	0.121405	12.9648	0.676225	0.105454	0.112553	0.726683	3.98033	3.81981	0.097348	97.0411
	UA 3286	14	73.6209	0.058497	12.9777	0.684258	0.090208	0.099434	0.723506	3.96737	3.85609	0.094002	96.1507
	UA 3286	15	74.0241	0.074307	12.8147	0.690328	0.114807	0.103585	0.803238	3.9493	3.63719	0.11113	96.2976
	UA 3286	16	74.0774	0.0811	12.8242	0.703709	0.099762	0.138269	0.716258	4.05668	3.76641	0.08621	96.5306
	UA 3286	17	74.6566	0.11722	12.972	0.657253	0.123197	0.116852	0.761067	3.95138	3.58911	0.101064	97.023
	UA 3286	18	74.1932	0.124048	12.7565	0.684732	0.136457	0.111833	0.757342	3.84447	3.91555	0.085131	96.5901
	UA 3286	19	74.5404	0.056424	12.7553	0.711335	0.067085	0.154621	0.771787	3.94268	3.87588	0.112454	96.9625
	UA 3286	20	74.9676	0.133168	12.9646	0.647972	0.097797	0.116059	0.749195	4.10396	3.95909	0.116977	97.83
	UA 3286	21	74.9937	0.151232	12.8444	0.662305	0.107738	0.093619	0.654628	4.00511	3.81143	0.112514	97.4113
	UA 3286	22	75.3148	0.191871	13.0459	0.683031	0.131125	0.120129	0.767945	4.03013	3.89508	0.136318	98.2856
	UA 3286	23	75.5224	0.051954	13.0384	0.657146	0.07186	0.108998	0.762561	4.19166	3.8689	0.110281	98.3593
	UA 3286	24	74.9706	0.092578	13.0118	0.734582	0.1054	0.140657	0.756343	4.16824	3.82861	0.120477	97.9021
	UA 3286	25	74.8056	0.131003	13.0249	0.681145	0.107785	0.099707	0.712476	3.89633	3.90763	0.086395	97.4335
	UA 3286	26	74.1914	0.167186	12.8318	0.663729	0.08416	0.128076	0.71424	3.72208	3.92513	0.115949	96.5177
	UA 3286	27	74.6374	0.124264	13.0384	0.640815	0.061469	0.123068	0.763518	3.9328	3.7028	0.119423	97.117
	UA 3286	28	74.5565	0.119737	13.0004	0.636385	0.113709	0.099807	0.760265	4.08147	3.75179	0.130767	97.2213
	UA 3286	29	75.7555	0.085903	12.8773	0.600517	0.067164	0.082324	0.766693	3.83688	3.90673	0.119439	98.0714
	UA 3286	30	75.0634	0.065519	13.2322	0.673564	0.111819	0.10187	0.755406	4.15557	3.74868	0.094401	97.9811
	ID3506_017	1	73.7905	0.074463	12.9621	1.61772	0.015107	0.048085	0.771239	3.84395	5.1021	0.319169	98.4725	Secondary standard
	ID3506_018	1	74.5644	0.047384	13.316	1.50852	0.092997	0.037852	0.671269	4.01045	5.18834	0.325991	99.6896
	ID3506_019	1	73.8797	0.133106	13.1986	1.62635	0.104561	0.049146	0.711391	3.91612	5.09223	0.337276	98.9724
	ID3506_020	1	74.4228	0.108315	13.229	1.65053	0.03588	0.053235	0.692728	3.95717	5.17792	0.31242	99.5695
	Old Crow_017	1	71.8372	0.243711	12.5904	1.61541	0.031884	0.277924	1.38775	3.41867	3.59927	0.260924	95.2043	Secondary standard
	Old Crow_018	1	72.2056	0.255145	12.6407	1.6161	0.016776	0.135386	1.40304	1.78621	3.49827	0.256684	93.7559
	Old Crow_019	1	70.747	0.338469	12.3672	1.60212	0.068959	0.242794	1.34574	3.064	3.60226	0.281277	93.5964
	Old Crow_020	1	73.3141	0.277564	12.8609	1.695	0.03448	0.294756	1.43584	3.6787	3.71082	0.269939	97.5111
Aug 22 2019	ID3506_010	1	73.6912	0.04788	13.2858	1.47803	0.078634	0.048259	0.747657	4.00775	5.14931	0.331141	98.7909	Secondary standard
	ID3506_011	1	73.6108	0.061356	13.0954	1.6167	0.024467	0.033254	0.73102	4.1837	5.06141	0.32089	98.6665
NaTDI 5-micron beam data	ID3506_012	1	74.099	0.086829	13.276	1.53217	0.088522	0.041332	0.722249	4.2753	5.18874	0.34542	99.5776
No manual corrections applied to normalised data	ID3506_013	1	74.2176	0.052421	13.1854	1.52327	0.079864	0.06647	0.709352	4.10519	5.1688	0.35156	99.3805
	OldCrow_010	1	71.8541	0.285935	12.5431	1.62184	0.053796	0.271951	1.38235	3.74558	3.47607	0.262203	95.4377	Secondary standard
	OldCrow_011	1	71.6642	0.308403	12.5033	1.66231	0.036858	0.261489	1.3911	4.02193	3.56788	0.260624	95.6192
	OldCrow_012	1	72.3339	0.357893	12.5799	1.61909	0.097092	0.316864	1.42058	3.4865	3.56426	0.262204	95.9791
	OldCrow_013	1	72.15	0.305471	12.5707	1.69897	0.04099	0.281889	1.36914	3.59849	3.51332	0.268963	95.7372
	UT1480	1	73.0944	0.166406	12.8268	1.26595	0.025672	0.228218	1.09732	3.95406	3.3704	0.252346	96.2247
	UT1480	2	70.6209	0.244026	14.6984	1.79766	0.069373	0.44846	2.14483	4.154	2.98198	0.334966	97.4191	White River Ash (northern lobe)
	UT1480	3	70.4678	0.311542	14.8032	1.6662	0.061151	0.424395	2.16806	4.28767	3.04931	0.351321	97.5113
	UT1480	4	69.1252	0.25318	14.4114	1.66037	0.053839	0.446994	2.03491	3.9762	2.89125	0.330751	95.1094	Sixtymile, Yukon, sample 16; Preece et al. (2014)
	UT1480	5	73.7174	0.11559	12.827	1.0369	0.030519	0.162457	1.10146	3.76427	3.31904	0.343834	96.3409	Not analysed concurrently with unknown sample
	UT1480	6	74.8317	0.11858	12.9524	1.17036	0	0.198153	1.1347	4.16549	3.26937	0.323707	98.0914
	UT1480	7	73.6673	0.1472	12.6777	0.993743	0.062452	0.19084	1.11179	3.88615	3.41062	0.288606	96.3713
	UT1480	8	70.5957	0.202451	12.2308	1.63994	0.077069	0.412157	1.18144	3.59683	3.32385	0.375468	93.551
	UT1480	9	60.0119	0.04659	22.9886	0.315646	0.020188	0.032645	5.99939	6.90319	0.687136	0.037883	97.0346
	UT1480	10	71.3364	0.232554	14.8748	1.60173	0.017435	0.410351	2.08968	4.35433	3.10115	0.370542	98.3053
	UT1480	11	75.6621	0.157715	12.1274	1.04528	0.081072	0.167893	0.784056	4.03752	3.50447	0.312766	97.8096
	UT1480	12	70.4041	0.244416	14.7466	1.64586	0.030498	0.412294	1.99396	4.27602	3.05992	0.331669	97.0705
	UT1480	13	69.1454	0.199165	14.9278	1.72573	0.082447	0.460435	2.0996	4.48509	3.07892	0.31398	96.4477
	UT1480	14	71.0337	0.222794	15.0396	1.63072	0.076151	0.461101	2.11207	4.54526	2.9386	0.361976	98.3403
	UT1480	15	71.0645	0.179236	14.8253	1.41433	0.034261	0.394961	2.14839	4.74834	2.76916	0.225051	97.7528
	UT1480	16	72.2296	0.12687	13.7525	1.12341	0.041532	0.258237	1.5538	4.24092	3.09229	0.275494	96.6325
	UT1480	17	71.5436	0.19814	14.5743	1.50172	0.049665	0.364753	1.85852	4.26024	3.07658	0.344422	97.6942
	UT1480	18	71.1444	0.242452	14.7595	1.60641	0.090772	0.451604	1.99464	4.85573	3.08316	0.334868	98.488
	UT1480	19	70.8394	0.178403	14.6691	1.6277	0.03979	0.410864	2.04447	4.4233	2.89671	0.388013	97.4301
	UT1480	20	70.1505	0.286568	14.5747	1.90359	0.090852	0.522785	2.09493	4.3171	3.14229	0.36808	97.3683
	UT1480	21	76.4285	0.157707	12.4682	1.11776	0.049591	0.116096	0.962728	3.57288	3.55343	0.314069	98.67
	UT1480	22	74.8688	0.11899	12.8252	1.03815	0.07209	0.163785	1.12689	3.70766	3.36488	0.266561	97.4928
	UT1480	23	74.4918	0.136844	12.715	1.08803	0.065961	0.14901	1.17956	3.73236	3.15663	0.294068	96.9429
	UT1480	24	70.0488	0.276498	14.5127	1.84208	0.045245	0.459034	2.16108	4.0911	3.13742	0.368388	96.8593
	UT1480	25	69.0512	0.242678	14.7489	1.72751	0.062851	0.461667	2.14676	4.50411	2.96969	0.392665	96.2194
	UT1480	26	73.4709	0.110575	13.3161	0.962087	0	0.126506	1.49346	3.70062	2.98381	0.287784	96.3868
	UT1480	27	70.2043	0.270066	14.5246	1.77681	0.049522	0.484076	2.15057	4.26202	3.12652	0.365293	97.1313
	UT1480	28	73.6602	0.152554	12.8934	1.19612	0.042312	0.25342	1.22937	4.03272	3.29328	0.278354	96.9689
	UT1480	29	64.7349	0.228753	12.3334	1.4391	0.083917	0.358866	1.50108	3.98049	3.20065	0.327456	88.1147
	UT1480	30	72.1232	0.254341	13.8293	1.52628	0.05606	0.367561	1.60342	3.94184	3.37171	0.368041	97.3587
	UT1480	31	74.1387	0.139304	12.8331	1.22784	0.027948	0.23895	1.1402	4.17172	3.3572	0.252712	97.4707
	UT1480	32	69.5161	0.309677	14.8497	1.75193	0.087418	0.491461	2.22182	4.27109	3.01849	0.357307	96.7944
	UT1480	33	69.9067	0.302275	14.7761	1.74089	0.067533	0.44444	2.08591	4.43486	2.9794	0.347156	97.007
	UT1480	34	69.8868	0.288978	14.8799	1.65429	0.105579	0.465798	2.14824	4.16156	3.08859	0.361314	96.9596
	UT1482	1	71.7696	0.281696	13.9506	1.54698	0.070824	0.375693	1.63253	4.11724	3.2492	0.342577	97.2596
	UT1482	2	72.3745	0.187317	13.6696	1.50246	0.075418	0.328922	1.46861	4.01196	3.23893	0.319717	97.1052	White River Ash (northern lobe)
	UT1482	3	70.0667	0.220257	14.3286	1.58715	0.04927	0.389589	1.98264	3.9777	3.07878	0.372098	95.9688
	UT1482	4	72.5307	0.214263	13.8668	1.42441	0.06532	0.364766	1.49597	3.6209	3.18985	0.295104	97.0015	Sixtymile, Yukon, sample 17; Preece et al. (2014)
	UT1482	5	70.7299	0.283975	14.4382	1.85992	0.100379	0.485083	1.98923	3.97907	3.23413	0.408211	97.416	Not analysed concurrently with unknown sample
	UT1482	6	73.4485	0.167513	11.8147	0.953621	0.047342	0.105684	0.84828	3.58147	3.5026	0.241129	94.6564
	UT1482	7	76.4994	0.117985	12.2548	1.03301	0.03974	0.111395	0.839825	3.58386	3.56575	0.237166	98.2294
	UT1482	8	71.6321	0.189167	13.8266	1.36739	0.049445	0.260773	1.54747	4.08405	3.02508	0.264477	96.1869
	UT1482	9	70.3623	0.267604	14.8065	1.83424	0.089614	0.4468	2.36671	4.47411	2.89882	0.402266	97.8583
	UT1482	10	68.7406	0.280832	14.4124	1.94489	0.086826	0.51427	2.04804	4.06762	3.49607	0.415599	95.9134
	UT1482	11	72.1551	0.197741	14.1689	1.30147	0.057997	0.304292	1.54033	4.30769	3.03601	0.266927	97.2762
	UT1482	12	70.5955	0.256829	14.0811	1.96477	0.032027	0.491251	2.00548	4.34149	3.22885	0.365595	97.2803
	UT1482	13	72.7492	0.163546	12.7747	1.32463	0.067774	0.307369	1.09854	3.77315	3.45035	0.295034	95.9377
	UT1482	14	69.7106	0.230395	14.7484	1.70039	0.061162	0.390517	2.15262	4.28182	3.17146	0.35258	96.7204
	UT1482	15	70.487	0.253039	14.4432	1.62062	0.035298	0.392642	1.89036	4.65811	3.01957	0.327556	97.0535
	UT1482	16	70.0897	0.259378	14.4616	1.61871	0.064541	0.454016	2.02411	4.4483	2.90865	0.405711	96.6432
	UT1482	17	69.9755	0.252311	14.3458	1.52102	0.036081	0.393324	2.05169	4.15415	3.07488	0.306831	96.0423
	UT1482	18	70.6632	0.2554	14.5796	1.70561	0.034502	0.414693	2.04866	4.08271	3.07962	0.371523	97.1517
	UT1482	19	69.606	0.303307	14.7097	1.80408	0.054405	0.476115	2.22548	4.16893	3.06165	0.35442	96.6841
	UT1482	20	68.9331	0.270572	14.7359	1.81243	0.046427	0.461815	2.18826	4.00808	3.05195	0.339778	95.7717
	UT1482	21	69.8894	0.28871	14.5813	1.77854	0.02197	0.47163	2.10534	3.95488	3.08738	0.36382	96.4608
	UT1482	22	70.5491	0.300765	14.8666	1.63447	0.071429	0.399227	2.10692	4.1042	2.9437	0.364814	97.2589
	UT1482	23	72.6911	0.137903	13.4544	1.00816	0.064424	0.199663	1.35052	4.33422	3.10722	0.272043	96.5582
	UT1482	24	70.4088	0.221567	14.7882	1.70564	0.050852	0.42556	2.05066	4.06838	2.94948	0.342018	96.9339
	UT1482	25	72.44	0.175324	13.9884	1.41316	0.060529	0.317067	1.53319	3.96508	3.01947	0.321895	97.1615
	UT1482	26	71.2962	0.254645	14.9778	1.67995	0.044005	0.421422	2.08658	4.40594	3.00401	0.328005	98.4245
	UT1482	27	68.5184	0.238224	14.5771	1.68855	0.033694	0.460796	2.12047	4.18496	3.05078	0.388015	95.1734
	UT1482	28	70.6007	0.304114	15.0111	1.808	0.068997	0.488923	2.28427	4.14487	2.99032	0.382873	97.9977
	UT1482	29	70.0922	0.302611	14.8906	1.7708	0.063957	0.46194	2.23446	4.54928	2.94902	0.363555	97.5964
	UT1482	30	74.265	0.126042	13.0194	1.2419	0.071386	0.257235	1.23654	4.21469	3.43219	0.298335	98.0954
	UT1482	31	74.1484	0.147099	13.0019	1.20386	0.02319	0.23079	1.25173	4.04449	3.3291	0.299969	97.6128
	UT1482	32	70.8657	0.248829	14.7701	1.64063	0.06766	0.414979	2.08648	4.52392	3.0388	0.334071	97.9157
	UT1482	33	73.5943	0.193665	13.0811	1.19042	0.028711	0.22559	1.22802	3.8927	3.12315	0.301661	96.7912
	UT1482	34	75.1672	0.040555	12.5734	1.05198	0.061577	0.192687	1.06218	4.18425	3.36392	0.26894	97.906
	ID3506_014	1	73.6524	0.07802	13.0031	1.50668	0.096373	0.044303	0.71859	4.39339	5.33269	0.341407	99.0899	Secondary standard
	ID3506_015	1	74.2063	0.07505	13.1733	1.50091	0.053486	0.050161	0.710455	3.90745	5.22946	0.334269	99.1655
	ID3506_016	1	73.587	0.070552	13.1949	1.5502	0.058315	0.034108	0.733509	3.80221	5.14207	0.346208	98.441
	ID3506_017	1	74.5448	0.05254	13.2001	1.53963	0.071405	0.011064	0.750921	4.25734	5.18178	0.343236	99.8753
	ID3506_018	1	73.41	0.081058	13.17	1.58137	0.079218	0.024195	0.730279	4.45994	5.14554	0.307549	98.9197
	ID3506_019	1	73.347	0.049539	13.1349	1.63491	0.084509	0.038255	0.669028	4.20153	5.12451	0.333647	98.5425
	OldCrow_014	1	72.1279	0.322733	12.6362	1.61142	0.05308	0.255159	1.42644	3.67257	3.46546	0.282294	95.7896	Secondary standard
	OldCrow_015	1	71.229	0.291156	12.5305	1.69987	0.127058	0.301849	1.38658	3.69815	3.62261	0.267261	95.0937
	OldCrow_016	1	72.2729	0.294278	12.4259	1.70791	0.023213	0.244064	1.37551	3.54176	3.55523	0.292766	95.6674
	OldCrow_017	1	71.9248	0.285425	12.549	1.6418	0.037489	0.279785	1.37036	1.35614	3.04935	0.230752	92.6728
	OldCrow_018	1	72.8955	0.264181	12.7419	1.6263	0.038372	0.272843	1.38094	4.12115	3.58581	0.29562	97.1559
	OldCrow_019	1	71.9572	0.270189	12.5276	1.5879	0.072841	0.25671	1.34481	3.45741	3.5362	0.248769	95.2036

## Sheet: Table S5
Table S5: Ages for tephras reviewed within this study, listed by associated tephra.
Dating methods: Con = conventional 14C dating; AMS = accelerator mass spectrometery 14C dating; Ice = GICC05 ice core chronology; nd = not defined
*x,xxx: Dates marked with a star and italicised were not included in our ages models for the reason listed under Comments (column K)
Eruption		Radiocarbon age (14C yr BP)	Laboratory number	Material dated	Stratigraphic context	Dating method	Location		Reference	Comments
Aniakchak CFE II		2,200±25	UCIAMS-154508	Leaf fragments	26.5cm above cryptotephra	AMS	Ruppert Lake	67°4.28'N 154°14.65'W	Monteath et al. (2017)	100.5cm depth in core RC
		2,590±85	NSRL-11364	Wood	16cm above tephra	AMS	Arolik Lake	N 59.47°, W 161.12°	Kaufman et al (2003); Hu et al. (2003)	11cm depth
		2,875±15	UCIAMS 37821	Leaf fragments	~15cm above tephra	AMS	Lone Spruce Pond	N 60.01°, W 159.14°	Kaufman et al (2012)	140.5cm in core 07-LSP-3
		2,890±40	Beta-182371	Sphagnum	28cm above cryptotephra	AMS	Nordon's Pond Bog	49° 9' 50" N 53° 36' 0"W	Hughes et al. (2006), Pyne-O'Donnell et al. (2012)	272cm depth in core NDN02/1
		2,910±35	UCIAMS-172056	Vegetation macrofossils	11.5cm above cryptotephra	AMS	Ruppert Lake	67°4.28'N 154°14.65'W	Monteath et al. (2017)	104.5cm depth in core RS
		2,990 ± 35	GrA-28723	Cyperaceous macrofossils	10-15mm above tephra	AMS	northern Seward Peninsula	N 66°28′22″, W 163°56′56″	Blackford et al. (2014)
		3,040 ± 40	GrA-28722	Cyperaceous macrofossils	5-10mm above tephra	AMS	northern Seward Peninsula	N 66°28′22″, W 163°56′56″	Blackford et al. (2014)
		3,065 ± 35	GrA-28720	Cyperaceous macrofossils	0-5mm above tephra	AMS	northern Seward Peninsula	N 66°28′22″, W 163°56′56″	Blackford et al. (2014)
		3,140±35	NSRL-11772	Vegetation macrofossils	8cm above tephra	AMS	Waskey Lake	N 59°52'46", W 159'12'24"	Levy et al (2004)	280-282cm in core WL-1
		3,280±20	UCIAMS-128457	Leaf fragment	20cm above tephra	AMS	St. Paul Lake	57.17809°N, 170.24828°W	Graham et al. (2016)	77.5cm depth in core LAHI-LAHI13 1D-2B-1; 274.5cm composite depth
	TEPHRA
		3,335 ± 40	GrA-28712	Cyperaceous macrofossils	5-10mm below tephra	AMS	northern Seward Peninsula	N 66°28′22″, W 163°56′56″	Blackford et al. (2014)
		3,350±200	W-3125	Charcoal twigs	At base of ashflow tuff	nd	Waterfall Creek	N 56°48.2', W 158°07.1'	Miller & Smith (1987)
		3,410±90	1-14,221	Charcoal log in tuff	In ashflow tuff	nd	Port Heiden Quarry	N 56°56.3', W 158°37.2'	Miller & Smith (1987)
		3,520±140	1-14,226	Charcoal	In pumice at base of tuff	nd	King Salmon River	N 57°30.1', W 157°31.2'	Miller & Smith (1987)
		3,560±25	UCIAMS-172057	Vegetation macrofossils	24.5cm below cryptotephra	AMS	Ruppert Lake	67°4.28'N 154°14.65'W	Monteath et al. (2017)	150.5cm depth in core RS
		3,575±20	UCIAMS 37822	Leaf fragments	10cm below tephra	AMS	Lone Spruce Pond	N 60.01°, W 159.14°	Kaufman et al (2012)	186.5cm in core 07-LSP-3
		3,630±85	NSRL 12336	Wood	1cm below tephra	AMS	Sunday Pond	N 59.67°, W 159.47°	Kaufman et al (2012)	328cm in core SP-1
		3,691±40	SUERC-538	Sphagnum	34cm below cryptotephra	AMS	Nordon's Pond Bog	49° 9' 50" N 53° 36' 0"W	Hughes et al. (2006), Pyne-O'Donnell et al. (2012)	334cm depth in core NDN02/1
		4,360±35	NRSL 11549	Twig	22cm below tephra	AMS	Nimgun Lake	N 59.56°, W 160.77°	Kaufman et al (2012)	228cm depth in core NL-2
		4,450±60	NSRL-11773	Vegetation macrofossils	48cm below tephra	AMS	Waskey Lake	N 59°52'46", W 159'12'24"	Levy et al (2004)	478-480cm in core WL-1
		4,635±25	UCIAMS-164425	Vegetation macrofossils	18cm below cryptotephra	AMS	Ruppert Lake	67°4.28'N 154°14.65'W	Monteath et al. (2017)	145cm depth in core RC
		5,295±30	CAMS 86531	Leaves and plant macros	57cm below tephra	AMS	Arolik Lake	N 59.47°, W 161.12°	Kaufman et al (2003); Hu et al. (2003)	111-112cm depth in core AL-4
	Rejected	3,270 ± 40	GrA-28718	Cyperaceous macrofossils	0-5mm below tephra	AMS	northern Seward Peninsula	N 66°28′22″, W 163°56′56″	Blackford et al. (2014)	Not reconcilable in model with ice core ages
	Rejected	3,305 ± 40	GrA-28711	Cyperaceous macrofossils	10-15mm below tephra	AMS	northern Seward Peninsula	N 66°28′22″, W 163°56′56″	Blackford et al. (2014)	Not reconcilable in model with ice core ages
Not included in model:		*2,400±80	Beta-7760	Peat	Above tephra	nd	Dome Creek	65° 18 N, 164° 44'W	Kaufman & Hopkins (1985)	Bulk analysis
		*2,770±95	GX-21371	Peat	40cm above basal ash	AMS	Dillingham section	nd	Waythomas & Neal (1998)	Bulk analysis
		*2,840±85	GX-21372	Peat	10cm above basal ash	AMS	Protection Point section	nd	Waythomas & Neal (1998)	Bulk analysis
		*2,910±135	GX-21375	Peat	10cm above basal ash	AMS	Nushagak Peninsula	nd	Waythomas & Neal (1998)	Bulk analysis
		*3,280±140	GC-21324	Peat	30cm above basal ash	AMS	Igushik section	nd	Waythomas & Neal (1998)	Bulk analysis
		*3,370±90	1-14,223	Peat horizon	Underlying air fall	nd	Chignik Bay	56°27.51N, 158°23.11W	Miller & Smith (1987)	Bulk analysis
		*3,400±750	W-3776	Lake sediments	12cm above tephra	nd	Tungak Lake	nd	Ager (1982)	Bulk analysis
		*3,570±100	B-19643	Hearth site	Above tephra	AMS	Cape Espenberg	nd	Beget et al (1992)	Unknown material dated
		*3,570±80	1-14,236	Peat horizon	Overlying tephra	nd	Pacific Ocean coast	56°55.7 ' N, 156°48.4'W	Miller & Smith (1987)	Bulk analysis
		*3,605±30	UCIAMS-154532	Carex seed, beetle fragment, wood fragment	2cm above cryptotephra peak	AMS	Woody Bottom Pond	67°4.55'N, 154°13.88'W	Monteath et al. (2017)	63cm in core WBP; described erroneously old in paper
		*3,840±40	NRSL 11068	Mixed macros	1-6cm above tephra	AMS	Little Swift Lake	60.21°N, 159.76°W	Axford & Kaufman (2004)	202-207cm in core LS-A; all ages in paper too old
		*4,830±79	W-4929	Bulk sediment	10cm above tephra	Con	Zagoskin Lake	63°26.9' N, 162° 06.3' W	Ager (2003); Muhs et al. (2003)	Bulk analysis
	TEPHRA
		*3,650±40	NRSL 10554	Macro	Within tephra	AMS	Nimgun Lake	59.56°N, 160.77°W	Kaufman et al (2012)	159cm, core NL-2; tephra not geochemically analysed
		*3,684±98	WSU-2759	Charred wood	Within tephra	nd	Site 4	nd	Riehle et al. (1987)	May be cryoturbated from above
		*2,800±45	NRSL 11365	Wood	Below tephra	AMS	Arolik Lake	59.47°N, 161.12°W	Kaufman et al (2003)	65cm in core AL-4; rejected in paper (too young)
		*3,220±100	GX-21323	Peat	Below basal ash contact	AMS	Dillingham section	nd	Waythomas & Neal (1998)	Bulk analysis
		*3,340±90	Beta-7761	Peat	Below tephra	nd	Dome Creek	65° 18 N, 164° 44'W	Kaufman & Hopkins (1985)	Bulk analysis
		*3,490±200	W-4052	Peaty material	Below tuff	nd	Pumice Creek	57°08'N, 158°18'W	Miller & Smith (1987)	Bulk analysis
		*3,500±80	1-14,228	Organic material	Below ash flow tuff	nd	N flank Aniakchak cone	57°02.7' N, 158°02'W	Miller & Smith (1987)	Bulk analysis
		*3,535±100	GX-21373	Peat	Below basal ash contact	AMS	Protection Point section	nd	Waythomas & Neal (1998)	Bulk analysis
		*3,560±145	GX-21325	Peat	Below basal ash contact	AMS	Igushik section	nd	Waythomas & Neal (1998)	Bulk analysis
		*3,610±200	W-3466	Peaty material	3-5cm below tephra	nd	Bering Sea cliff	57°06.61 N, 158°31.8'W	Miller & Smith (1987)	Bulk analysis
		*3,670±60	W-4582	Peaty material	Below tuff	nd	NE of Cinder River	57°07.5'N, 157°40. 5' W	Miller & Smith (1987)	Bulk analysis
		*3,700±90	B-23170	Soil complex	Below tephra	nd	Cape Espenberg	nd	Beget et al (1992)	Bulk analysis
		*3,750±80	B-33758	Soil complex	Below tephra	nd	Cape Espenberg	nd	Beget et al (1992)	Bulk analysis
		*4,000±100	I-13,990	Peat	Below tephra	nd	Pargon River bluff	nd	Riehle et al. (1987)	Bulk analysis
		*4,415±150	GX-21376	Peat	Below basal ash contact	AMS	Nushagak Peninsula	nd	Waythomas & Neal (1998)	Bulk analysis
		*5,645±250	W-3934	Lake sediments	13-44cm below tephra	nd	Tungak Lake	nd	Ager (1982)	Bulk analysis
		*6,930±90	W-4626	Bulk sediment	20cm below tephra	Con	Zagoskin Lake	nd	Ager (2003); Muhs et al. (2003)	Bulk analysis
Opala
		1240±100	IVAN-400	Peat	Overlying tephra	nd	Petropavlovsk Kamchatsky	-	Braitseva et al. (1995)	Thick peat layer
		1440±100	IVAN-189	Soil	Overlying tephra	nd	Karymsky	-	Braitseva et al. (1995)
		1450±70	IVAN-171	Charcoal	Overlying tephra	nd	Zhupanovo	-	Braitseva et al. (1995)	Charcoal from cultural layer overlying ash
		1490±80	IVAN-316	Soil	Overlying tephra	nd	Krasheninnikov	-	Braitseva et al. (1995)
	TEPHRA
		1400±50	IVAN-317	Buried soil	Underlying tephra	nd	Krasheninnikov	-	Braitseva et al. (1995)
		1490±70	GIN-1034	Charcoal	Within tephra	nd	Opala	-	Braitseva et al. (1995)	Carbonised wood from within the pyroclastic deposits
		1500±80	IVAN-192	Buried soil	Underlying tephra	nd	Karymsky	-	Braitseva et al. (1995)
		1530±30	GIN-3026	Buried soil	Underlying tephra	nd	Kronotskoye Lake	-	Braitseva et al. (1995)
		1550±100	IVAN-172	Charcoal	Underlying tephra	nd	Zhupanovo	-	Braitseva et al. (1995)	Charcoal from cultural layer underlying ash
		1560±90	IVAN-328	Buried soil	Underlying tephra	nd	Uzon Caldera	-	Braitseva et al. (1995)
		1620±80	IVAN-399	Peat	Underlying tephra	nd	Petropavlovsk Kamchatsky	-	Braitseva et al. (1995)	Thick peat layer
	Rejected	1610±80	IVAN-323	Soil	Overlying tephra	nd	Uzon Caldera		Braitseva et al. (1995)	Out of stratigraphic order with other dates
Not included in model:		*1420±50	IVAN-372	Buried soil	Soil enclosing tephra layer	nd	Kikhpinych	-	Braitseva et al. (1995)	Unclear how organic material dated would have related to the tephra horizon
		*1430±60	IVAN-467	Buried soil	Soil enclosing tephra layer	nd	Kamchatka River	-	Braitseva et al. (1995)	Unclear how organic material dated would have related to the tephra horizon
		*1891±40	UBA-12582	Bulk sediment	Below tephra (see comment)	AMS	Olive-backed Lake	56°12.074′ N, 158°51.493′ E	Plunkett et al. (2015)	14C date taken from core OBA; tephra identified in OBD

## Sheet: Table S6
Table S6: OxCal age model output for the initial multi-method chronometer comparison. Age models based on a) radiometric ages and b) correlated tephra ages.
a) 14C and 210Pb age model					b) Tephra correlated age model
Depth	Median age	95.4% range (cal yr BP)			Depth	Median age	95.4% range (cal yr BP)
0	-60	-60	-65		0	-60	-60	-65
1	-15	-5	-20		1	-30	15	-65
2	15	25	5		2	5	90	-65
3	50	65	35		3	45	155	-65
4	270	465	105		4	80	210	-60
5	335	545	125		5	115	265	-50
6	400	625	155		6	155	320	-20
7	465	700	200		7	190	375	10
8	530	770	255		8	225	425	35
9	590	820	340		9	265	475	60
10	655	870	430		10	300	520	95
11	705	895	540		11	335	565	130
12	760	920	655		12	375	610	165
13	860	1150	660		13	410	650	195
14	960	1385	665		14	450	690	225
15	1065	1590	675		15	485	730	255
16	1175	1765	690		16	520	770	290
17	1290	1940	710		17	560	815	325
18	1400	2085	750		18	595	860	360
19	1515	2230	790		19	630	900	400
20	1630	2390	855		20	670	935	445
21	1740	2560	925		21	705	970	485
22	1855	2705	1020		22	740	1000	525
23	1970	2770	1185		23	780	1030	565
24	2080	2835	1350		24	815	1065	610
25	2195	2875	1490		25	855	1105	650
26	2305	2915	1630		26	890	1135	695
27	2420	2950	1780		27	930	1165	735
28	2530	2970	1965		28	965	1195	775
29	2640	2995	2150		29	1000	1225	825
30	2735	3000	2395		30	1040	1255	870
31	2830	3005	2640		31	1075	1275	920
32	2890	3035	2770		32	1115	1300	970
33	2915	3085	2780		33	1150	1320	1020
34	2940	3140	2790		34	1190	1340	1075
35	2965	3195	2800		35	1225	1360	1125
36	2995	3250	2810		36	1265	1370	1170
37	3025	3300	2820		37	1300	1385	1220
38	3050	3360	2830		38	1330	1425	1245
39	3080	3405	2845		39	1360	1465	1275
40	3110	3450	2860		40	1390	1505	1300
41	3140	3495	2875		41	1425	1540	1325
42	3170	3540	2885		42	1455	1575	1350
43	3200	3580	2895		43	1485	1605	1380
44	3230	3625	2905		44	1515	1635	1415
45	3255	3675	2915		45	1550	1665	1445
46	3285	3710	2935		46	1580	1690	1480
47	3315	3745	2960		47	1610	1715	1510
48	3345	3780	2980		48	1645	1740	1545
49	3375	3820	2995		49	1675	1790	1565
50	3410	3860	3015		50	1710	1835	1580
51	3440	3900	3040		51	1745	1885	1600
52	3465	3940	3065		52	1775	1930	1620
53	3500	3975	3085		53	1810	1975	1635
54	3530	4010	3105		54	1845	2020	1655
55	3560	4050	3130		55	1875	2060	1680
56	3590	4090	3150		56	1910	2100	1710
57	3620	4130	3170		57	1945	2140	1740
58	3645	4175	3195		58	1980	2180	1770
59	3675	4215	3215		59	2015	2220	1800
60	3705	4240	3250		60	2045	2255	1825
61	3735	4260	3280		61	2080	2295	1855
62	3765	4285	3315		62	2115	2330	1885
63	3795	4310	3350		63	2150	2365	1915
64	3825	4335	3380		64	2180	2400	1945
65	3855	4360	3415		65	2215	2440	1975
66	3885	4390	3445		66	2250	2475	2005
67	3915	4420	3480		67	2285	2510	2030
68	3945	4445	3515		68	2315	2545	2065
69	3975	4465	3545		69	2350	2580	2100
70	4005	4490	3580		70	2385	2610	2135
71	4035	4520	3610		71	2420	2645	2175
72	4065	4550	3635		72	2455	2675	2205
73	4095	4575	3660		73	2485	2705	2240
74	4125	4595	3705		74	2520	2735	2270
75	4155	4610	3745		75	2555	2780	2310
76	4185	4635	3780		76	2590	2820	2345
77	4215	4650	3815		77	2625	2860	2380
78	4245	4670	3855		78	2655	2895	2410
79	4275	4700	3890		79	2690	2930	2445
80	4305	4725	3930		80	2725	2960	2475
81	4335	4740	3970		81	2760	2995	2495
82	4360	4760	4010		82	2795	3030	2520
83	4390	4785	4050		83	2825	3060	2570
84	4420	4805	4085		84	2860	3095	2610
85	4445	4825	4125		85	2895	3125	2635
86	4475	4845	4160		86	2930	3160	2670
87	4500	4865	4185		87	2965	3195	2715
88	4530	4895	4210		88	3000	3225	2755
89	4555	4925	4235		89	3035	3255	2790
90	4580	4955	4260		90	3065	3285	2825
91	4605	4985	4280		91	3100	3315	2865
92	4630	5015	4300		92	3135	3345	2910
93	4655	5045	4315		93	3170	3385	2955
94	4680	5075	4340		94	3205	3415	2995
95	4705	5100	4360		95	3235	3440	3035
96	4735	5130	4380		96	3270	3465	3080
97	4760	5160	4400		97	3305	3490	3125
98	4785	5195	4420		98	3340	3510	3170
99	4810	5225	4435		99	3375	3530	3215
100	4835	5255	4455		100	3405	3550	3270
101	4860	5275	4480		101	3440	3570	3325
102	4890	5300	4505		102	3475	3575	3375
103	4915	5320	4530		103	3510	3580	3425
104	4940	5350	4555		104	3540	3585	3490
105	4965	5375	4575		105	3575	3595	3555
106	4990	5405	4600
107	5020	5430	4620
108	5045	5455	4645
109	5070	5480	4670
110	5095	5505	4695
111	5120	5535	4715
112	5150	5570	4740
113	5175	5595	4760
114	5200	5615	4795
115	5225	5630	4830
116	5250	5650	4865
117	5280	5665	4895
118	5305	5685	4930
119	5330	5700	4960
120	5355	5720	4995
121	5380	5735	5030
122	5410	5750	5065
123	5435	5765	5095
124	5460	5785	5125
125	5485	5800	5155
126	5515	5815	5180
127	5540	5830	5220
128	5565	5840	5260
129	5590	5850	5305
130	5615	5860	5340
131	5640	5870	5380
132	5665	5885	5420
133	5690	5890	5460
134	5715	5895	5500
135	5740	5900	5545
136	5765	5905	5590
137	5785	5915	5640
138	5805	5925	5685
139	5830	5930	5735
140	5855	5985	5740
141	5885	6040	5750
142	5910	6090	5755
143	5935	6135	5760
144	5960	6180	5770
145	5985	6225	5775
146	6010	6270	5780
147	6040	6315	5790
148	6065	6350	5805
149	6095	6395	5815
150	6120	6440	5825
151	6150	6475	5840
152	6175	6515	5855
153	6205	6555	5865
154	6230	6595	5875
155	6260	6625	5895
156	6285	6655	5915
157	6315	6685	5935
158	6345	6715	5955
159	6370	6750	5980
160	6400	6790	6000
161	6425	6825	6020
162	6455	6855	6040
163	6485	6880	6060
164	6510	6915	6080
165	6540	6950	6105
166	6565	6990	6125
167	6595	7030	6145
168	6620	7060	6165
169	6650	7085	6195
170	6675	7105	6235
171	6705	7125	6265
172	6730	7145	6295
173	6760	7170	6335
174	6785	7195	6375
175	6815	7215	6400
176	6840	7235	6430
177	6870	7255	6465
178	6895	7275	6500
179	6925	7295	6530
180	6955	7315	6565
181	6980	7335	6600
182	7010	7355	6630
183	7035	7380	6655
184	7065	7390	6690
185	7090	7400	6735
186	7120	7415	6775
187	7145	7430	6815
188	7175	7440	6855
189	7200	7455	6895
190	7230	7470	6930
191	7255	7485	6970
192	7280	7495	7020
193	7305	7505	7065
194	7330	7520	7110
195	7355	7535	7165
196	7380	7545	7220
197	7405	7555	7270
198	7425	7570	7315
199	7470	7655	7320
200	7515	7745	7325
201	7560	7835	7330
202	7605	7925	7340
203	7655	8005	7350
204	7700	8080	7365
205	7750	8155	7380
206	7800	8235	7390
207	7845	8315	7405
208	7895	8380	7430
209	7945	8440	7465
210	7995	8500	7490
211	8045	8565	7515
212	8090	8630	7545
213	8140	8705	7580
214	8190	8775	7620
215	8240	8840	7645
216	8285	8905	7675
217	8335	8950	7735
218	8385	8985	7805
219	8430	9025	7875
220	8480	9060	7940
221	8530	9095	8000
222	8580	9120	8065
223	8625	9145	8130
224	8675	9180	8190
225	8725	9220	8250
226	8775	9240	8315
227	8820	9260	8390
228	8870	9275	8460
229	8915	9300	8535
230	8965	9325	8615
231	9010	9345	8705
232	9055	9365	8795
233	9100	9380	8880
234	9140	9390	8965
235	9180	9415	9010
236	9210	9450	9030
237	9245	9495	9040
238	9275	9550	9050
239	9305	9610	9065
240	9340	9665	9080
241	9370	9725	9100
242	9405	9780	9110
243	9435	9835	9125
244	9470	9880	9140
245	9505	9920	9160
246	9540	9970	9175
247	9575	10015	9195
248	9610	10065	9210
249	9645	10115	9230
250	9675	10160	9245
251	9710	10215	9255
252	9745	10260	9275
253	9780	10295	9305
254	9815	10330	9330
255	9850	10365	9355
256	9885	10405	9380
257	9920	10445	9415
258	9955	10480	9445
259	9985	10525	9465
260	10020	10570	9480
261	10055	10610	9510
262	10090	10645	9545
263	10125	10680	9570
264	10160	10715	9595
265	10195	10755	9620
266	10230	10800	9650
267	10260	10845	9680
268	10295	10890	9700
269	10330	10935	9725
270	10365	10955	9765
271	10400	10975	9805
272	10430	11000	9850
273	10465	11030	9890
274	10500	11060	9930
275	10535	11090	9970
276	10570	11120	10005
277	10605	11150	10040
278	10640	11180	10080
279	10675	11205	10125
280	10705	11230	10165
281	10740	11255	10195
282	10775	11280	10230
283	10810	11310	10265
284	10845	11335	10305
285	10880	11370	10335
286	10915	11400	10365
287	10945	11420	10415
288	10980	11435	10465
289	11015	11455	10510
290	11050	11480	10560
291	11085	11505	10610
292	11115	11520	10650
293	11150	11545	10695
294	11180	11565	10740
295	11215	11590	10785
296	11245	11600	10835
297	11280	11615	10890
298	11310	11635	10945
299	11345	11655	11000
300	11380	11670	11055
301	11410	11685	11110
302	11445	11705	11155
303	11475	11725	11195
304	11525	11795	11220
305	11585	11900	11230
306	11645	12010	11240
307	11705	12130	11250
308	11765	12250	11265
309	11825	12375	11280
310	11885	12485	11300
311	11950	12590	11325
312	12010	12695	11350
313	12075	12805	11375
314	12135	12915	11395
315	12200	13030	11415
316	12260	13120	11460
317	12325	13215	11515
318	12390	13305	11565
319	12450	13395	11610
320	12515	13485	11655
321	12580	13575	11700
322	12645	13665	11750
323	12705	13750	11795
324	12770	13835	11845
325	12835	13930	11890
326	12895	14020	11935
327	12960	14105	11990
328	13020	14170	12070
329	13085	14235	12155
330	13150	14300	12235
331	13210	14370	12310
332	13275	14435	12380
333	13340	14500	12455
334	13405	14565	12535
335	13470	14630	12610
336	13535	14700	12685
337	13595	14775	12755
338	13660	14850	12825
339	13725	14900	12905
340	13790	14945	12990
341	13850	14985	13080
342	13915	15035	13160
343	13980	15090	13240
344	14040	15145	13320
345	14105	15185	13405
346	14165	15225	13490
347	14230	15265	13575
348	14290	15295	13645
349	14350	15325	13720
350	14410	15350	13790

## Sheet: Table S7
Table S7: Final OxCal age model output for 0-3.51 m of CASC13-4A/2D, Cascade Lake. Produced using OxCal v4.4. All ages are rounded to five years.
Depth	Mean age (cal yr BP)	Mean age (CE)	1 SD	68.2% range (cal yr BP)		95.4% range (cal yr BP)		Sedimentation rate (cm/yr)	Date at this depth?
0	-65	2015	5	-60	-65	-60	-65	0.0218	Y - coring date
1	-15	1965	5	-10	-20	-10	-20	0.0227	Y - 210Pb
2	15	1935	5	20	10	25	10	0.0334	Y - 210Pb
3	50	1900	5	55	45	60	40	0.0226	Y - 210Pb, 14C
4	110	1840	35	130	70	180	60	0.0157
5	180	1770	100	225	70	400	65	0.0144
6	255	1695	150	330	85	570	70	0.0135	14C outlier
7	330	1620	160	470	140	625	75	0.0135
8	405	1545	165	595	215	680	95	0.0135
9	480	1470	155	665	350	715	155	0.0135
10	550	1400	140	725	485	745	230	0.0139
11	625	1325	85	725	575	760	440	0.017
12	700	1250	35	725	670	775	650	0.0201	Y - 14C
13	725	1225	50	755	675	840	655	0.0262
14	750	1200	65	785	680	905	660	0.0323
15	775	1175	80	815	685	965	665	0.0384
16	800	1150	85	850	700	1005	670	0.0392
17	825	1125	95	885	710	1035	675	0.0392
18	850	1100	100	920	725	1065	685	0.0392
19	880	1070	105	955	750	1095	695	0.0392
20	905	1045	110	990	770	1125	705	0.0392
21	930	1020	110	1025	795	1155	720	0.0392
22	955	995	115	1060	825	1180	740	0.0392
23	980	970	115	1095	850	1210	760	0.0392
24	1005	945	115	1130	880	1235	780	0.0392
25	1030	920	115	1160	910	1260	805	0.0391
26	1055	895	115	1185	945	1280	830	0.0391
27	1080	870	115	1215	975	1300	855	0.0391
28	1110	840	110	1240	1010	1320	880	0.0391
29	1135	815	110	1265	1040	1335	910	0.0391
30	1160	790	105	1285	1075	1355	940	0.0391
31	1185	765	100	1310	1110	1370	970	0.0391	14C outlier
32	1210	740	95	1325	1140	1380	1005	0.0391
33	1235	715	90	1340	1175	1390	1045	0.0391
34	1260	690	80	1355	1210	1400	1080	0.0391
35	1285	665	65	1365	1235	1405	1140	0.039
36	1310	640	55	1370	1265	1415	1195	0.0388
37	1340	610	40	1380	1295	1420	1255	0.0386	Y - tephra
38	1365	585	50	1410	1305	1475	1265	0.0385
39	1390	560	65	1440	1315	1525	1275	0.0383
40	1415	535	75	1475	1330	1575	1285	0.0381
41	1445	505	75	1510	1355	1605	1300	0.0381
42	1470	480	80	1545	1380	1635	1315	0.0381
43	1495	455	80	1575	1405	1660	1335	0.0381
44	1520	430	80	1605	1440	1685	1360	0.0381
45	1550	400	80	1635	1470	1705	1385	0.0381
46	1575	375	75	1655	1500	1720	1420	0.0369
47	1600	350	70	1675	1530	1735	1460	0.0352
48	1625	325	60	1690	1560	1750	1500	0.0335	Y - tephra
49	1660	290	80	1725	1570	1825	1510	0.0324
50	1695	255	95	1765	1585	1900	1515	0.0313
51	1725	225	115	1800	1595	1975	1525	0.0302
52	1760	190	125	1840	1615	2035	1535	0.0299
53	1795	155	140	1885	1635	2085	1550	0.0299
54	1825	125	150	1925	1655	2140	1565	0.0299
55	1860	90	155	1965	1675	2190	1580	0.0299
56	1895	55	165	2010	1700	2235	1600	0.0299
57	1925	25	170	2055	1725	2280	1615	0.0299
58	1960	-10	175	2095	1755	2325	1635	0.0299
59	1995	-45	180	2140	1785	2365	1655	0.0299
60	2025	-75	185	2180	1815	2410	1680	0.0299
61	2060	-110	190	2225	1845	2450	1700	0.0299
62	2095	-145	190	2265	1875	2490	1725	0.0299
63	2130	-180	195	2300	1910	2525	1750	0.0299
64	2160	-210	195	2340	1940	2565	1780	0.0299
65	2195	-245	200	2380	1975	2600	1805	0.0299
66	2230	-280	200	2415	2010	2635	1835	0.0299
67	2260	-310	200	2450	2045	2670	1860	0.0299
68	2295	-345	200	2490	2085	2705	1890	0.0299
69	2330	-380	200	2525	2120	2740	1925	0.0299
70	2360	-410	200	2560	2155	2770	1960	0.0299
71	2395	-445	200	2595	2190	2805	1995	0.0299
72	2430	-480	200	2625	2225	2835	2030	0.0297
73	2460	-510	200	2660	2260	2865	2065	0.0295
74	2495	-545	195	2695	2295	2895	2100	0.0293	Y - tephra
75	2530	-580	200	2730	2330	2935	2130	0.029
76	2565	-615	205	2765	2360	2975	2155	0.0288
77	2600	-650	205	2805	2395	3015	2185	0.0288
78	2635	-685	210	2845	2425	3055	2215	0.0288
79	2670	-720	210	2885	2460	3090	2245	0.0288
80	2705	-755	210	2920	2495	3125	2275	0.0288
81	2740	-790	215	2960	2535	3165	2305	0.0288
82	2775	-825	215	3000	2570	3200	2340	0.0288
83	2810	-860	215	3035	2605	3230	2375	0.0288
84	2845	-895	215	3070	2640	3265	2410	0.0288
85	2880	-930	210	3105	2675	3295	2445	0.0288
86	2910	-960	210	3145	2715	3325	2485	0.0288
87	2945	-995	210	3180	2755	3355	2525	0.0288	14C outlier
88	2980	-1030	205	3215	2800	3380	2560	0.0288
89	3015	-1065	205	3250	2840	3410	2600	0.0288
90	3050	-1100	200	3285	2880	3435	2640	0.0288
91	3085	-1135	200	3320	2925	3460	2680	0.0288
92	3120	-1170	195	3350	2970	3480	2725	0.0288
93	3155	-1205	190	3385	3010	3500	2775	0.0288
94	3190	-1240	185	3415	3055	3520	2820	0.0288
95	3225	-1275	180	3445	3105	3540	2865	0.0288
96	3260	-1310	170	3475	3150	3555	2915	0.0288
97	3295	-1345	165	3505	3200	3565	2965	0.0288
98	3330	-1380	155	3525	3250	3575	3015	0.0288
99	3365	-1415	145	3550	3300	3580	3065	0.0288
100	3400	-1450	135	3565	3350	3585	3120	0.0288
101	3435	-1485	120	3575	3395	3590	3180	0.0288
102	3470	-1520	105	3580	3440	3590	3245	0.0288
103	3505	-1555	85	3585	3485	3595	3310	0.0288
104	3540	-1590	50	3585	3525	3595	3430	0.0245
105	3570	-1620	10	3585	3560	3595	3555	0.0199	Y - tephra
106	3640	-1690	85	3660	3560	3820	3555	0.0177
107	3705	-1755	155	3730	3560	4045	3550	0.0155
108	3770	-1820	190	3815	3565	4180	3555	0.0152
109	3835	-1885	220	3900	3570	4300	3560	0.0152
110	3900	-1950	245	3995	3595	4400	3565	0.0152
111	3965	-2015	265	4095	3630	4500	3570	0.0152
112	4030	-2080	280	4190	3670	4590	3580	0.0152
113	4095	-2145	295	4285	3725	4685	3595	0.0152
114	4165	-2215	305	4380	3780	4775	3620	0.0152
115	4230	-2280	315	4470	3840	4865	3655	0.0152
116	4295	-2345	325	4560	3905	4950	3690	0.0152
117	4360	-2410	330	4645	3970	5025	3735	0.0152
118	4425	-2475	340	4730	4040	5105	3780	0.0152
119	4490	-2540	340	4810	4110	5175	3830	0.0152
120	4555	-2605	345	4890	4180	5250	3880	0.0152
121	4625	-2675	345	4970	4255	5315	3940	0.0152
122	4690	-2740	350	5050	4330	5385	4000	0.0152
123	4755	-2805	345	5125	4405	5440	4065	0.0152
124	4820	-2870	345	5195	4480	5495	4125	0.0152
125	4885	-2935	340	5265	4560	5545	4200	0.0152
126	4950	-3000	340	5335	4645	5600	4270	0.0152
127	5015	-3065	335	5405	4730	5645	4350	0.0152
128	5080	-3130	325	5470	4815	5690	4425	0.0152
129	5150	-3200	315	5535	4900	5725	4505	0.0152
130	5215	-3265	310	5595	4990	5760	4585	0.0152
131	5280	-3330	295	5650	5080	5790	4670	0.0152
132	5345	-3395	280	5705	5175	5815	4755	0.0152
133	5410	-3460	265	5745	5265	5840	4850	0.0152
134	5475	-3525	245	5775	5350	5870	4960	0.0152
135	5540	-3590	225	5800	5435	5890	5070	0.0152
136	5605	-3655	195	5815	5515	5900	5190	0.0152
137	5675	-3725	165	5825	5595	5905	5320	0.0156
138	5740	-3790	105	5820	5670	5910	5535	0.0186
139	5805	-3855	45	5820	5750	5910	5745	0.0216	Y - 14C
140	5830	-3880	65	5865	5755	5970	5745	0.0302
141	5860	-3910	80	5910	5760	6030	5745	0.0374
142	5885	-3935	95	5935	5775	6085	5750	0.0374
143	5910	-3960	105	5960	5785	6135	5755	0.0374
144	5940	-3990	115	5995	5800	6175	5760	0.0374
145	5965	-4015	120	6030	5815	6220	5770	0.0374
146	5990	-4040	130	6065	5835	6260	5775	0.0374
147	6020	-4070	135	6100	5850	6300	5785	0.0374
148	6045	-4095	140	6135	5870	6335	5800	0.0374
149	6070	-4120	150	6175	5890	6375	5810	0.0374
150	6100	-4150	155	6210	5915	6415	5825	0.0374
151	6125	-4175	160	6245	5935	6450	5840	0.0374
152	6150	-4200	160	6280	5955	6485	5850	0.0374
153	6180	-4230	165	6310	5980	6520	5870	0.0374
154	6205	-4255	170	6345	6005	6555	5885	0.0374
155	6230	-4280	175	6375	6030	6585	5905	0.0374
156	6260	-4310	175	6410	6055	6620	5925	0.0374
157	6285	-4335	180	6440	6085	6650	5940	0.0374
158	6310	-4360	180	6475	6110	6685	5960	0.0374
159	6340	-4390	185	6505	6135	6715	5985	0.0374
160	6365	-4415	185	6535	6165	6745	6005	0.0374
161	6395	-4445	190	6565	6185	6775	6025	0.0374
162	6420	-4470	190	6595	6215	6805	6050	0.0374
163	6445	-4495	190	6625	6240	6830	6070	0.0374
164	6475	-4525	190	6660	6270	6860	6095	0.0374
165	6500	-4550	190	6690	6300	6890	6120	0.0374
166	6525	-4575	195	6720	6325	6915	6145	0.0374
167	6555	-4605	195	6750	6355	6945	6170	0.0374
168	6580	-4630	195	6775	6380	6970	6195	0.0374
169	6605	-4655	195	6805	6410	6995	6220	0.0374
170	6635	-4685	195	6835	6440	7020	6245	0.0374
171	6660	-4710	190	6865	6470	7045	6275	0.0374
172	6685	-4735	190	6890	6500	7070	6300	0.0374
173	6715	-4765	190	6915	6530	7095	6330	0.0374
174	6740	-4790	190	6945	6560	7115	6360	0.0374
175	6765	-4815	190	6970	6590	7140	6385	0.0374
176	6795	-4845	185	7000	6620	7165	6415	0.0374
177	6820	-4870	185	7025	6650	7185	6445	0.0374
178	6845	-4895	185	7050	6685	7205	6475	0.0374
179	6875	-4925	180	7075	6715	7225	6505	0.0374
180	6900	-4950	180	7100	6745	7245	6535	0.0374
181	6925	-4975	175	7130	6775	7260	6565	0.0374
182	6955	-5005	175	7155	6810	7280	6600	0.0374
183	6980	-5030	170	7180	6840	7300	6630	0.0374
184	7010	-5060	165	7200	6875	7315	6665	0.0374
185	7035	-5085	160	7225	6910	7335	6700	0.0374
186	7060	-5110	155	7245	6945	7345	6735	0.0374
187	7090	-5140	155	7270	6975	7360	6765	0.0374
188	7115	-5165	145	7295	7010	7375	6800	0.0374
189	7140	-5190	140	7315	7050	7390	6840	0.0374
190	7170	-5220	135	7330	7085	7400	6875	0.0374
191	7195	-5245	130	7345	7120	7415	6915	0.0374
192	7220	-5270	120	7360	7155	7420	6955	0.0374
193	7250	-5300	115	7375	7185	7425	6995	0.0374
194	7275	-5325	105	7380	7215	7430	7030	0.0374
195	7300	-5350	90	7400	7250	7445	7085	0.0374
196	7330	-5380	80	7420	7290	7460	7145	0.0374
197	7355	-5405	60	7425	7315	7465	7230	0.0321
198	7380	-5430	45	7430	7340	7460	7320	0.0259	Y - 14C
199	7435	-5485	85	7475	7340	7610	7320	0.0232
200	7485	-5535	130	7520	7345	7760	7325	0.0206
201	7535	-5585	155	7580	7355	7865	7330	0.0198
202	7585	-5635	175	7650	7370	7955	7335	0.0198
203	7635	-5685	195	7720	7395	8040	7345	0.0198
204	7685	-5735	210	7790	7425	8115	7360	0.0198
205	7735	-5785	220	7865	7455	8190	7375	0.0198
206	7785	-5835	235	7940	7495	8260	7390	0.0198
207	7835	-5885	245	8010	7535	8330	7410	0.0198
208	7885	-5935	250	8080	7580	8395	7435	0.0198
209	7935	-5985	260	8145	7630	8460	7460	0.0198
210	7990	-6040	265	8210	7680	8520	7490	0.0198
211	8040	-6090	270	8270	7725	8585	7525	0.0198
212	8090	-6140	275	8335	7775	8640	7560	0.0198
213	8140	-6190	275	8395	7830	8695	7600	0.0198
214	8190	-6240	280	8455	7880	8750	7640	0.0198
215	8240	-6290	280	8520	7940	8805	7685	0.0198
216	8290	-6340	285	8580	7995	8855	7730	0.0198
217	8340	-6390	285	8635	8055	8905	7780	0.0198
218	8390	-6440	280	8690	8110	8950	7830	0.0198
219	8440	-6490	280	8745	8170	8995	7880	0.0198
220	8495	-6545	280	8795	8225	9035	7930	0.0198
221	8545	-6595	275	8850	8285	9075	7985	0.0198
222	8595	-6645	270	8900	8350	9115	8045	0.0198
223	8645	-6695	265	8950	8415	9150	8100	0.0198
224	8695	-6745	260	8995	8480	9185	8160	0.0198
225	8745	-6795	255	9045	8540	9220	8220	0.0198
226	8795	-6845	245	9085	8605	9250	8280	0.0198
227	8845	-6895	235	9125	8670	9275	8350	0.0198
228	8895	-6945	225	9160	8735	9305	8420	0.0198
229	8945	-6995	215	9195	8800	9335	8500	0.0198
230	8995	-7045	200	9225	8865	9365	8580	0.0198
231	9045	-7095	180	9255	8930	9380	8670	0.0198
232	9100	-7150	165	9280	8995	9395	8760	0.0198
233	9150	-7200	135	9290	9050	9405	8865	0.0215
234	9200	-7250	105	9300	9105	9410	8975	0.0236
235	9240	-7290	100	9325	9135	9440	9030	0.0266	Y - 14C
236	9270	-7320	110	9370	9140	9505	9035	0.0303
237	9300	-7350	125	9410	9150	9565	9050	0.0327
238	9330	-7380	135	9430	9175	9625	9085	0.0327
239	9360	-7410	145	9455	9195	9685	9115	0.0327
240	9390	-7440	155	9495	9215	9725	9130	0.0327
241	9420	-7470	160	9535	9235	9770	9145	0.0327
242	9455	-7505	170	9575	9255	9815	9155	0.0327
243	9485	-7535	175	9610	9275	9860	9170	0.0328
244	9515	-7565	185	9645	9300	9900	9185	0.0328
245	9545	-7595	190	9685	9330	9945	9200	0.0327
246	9575	-7625	195	9725	9350	9985	9220	0.0328
247	9605	-7655	200	9765	9375	10025	9235	0.0328	14C outlier
248	9635	-7685	205	9800	9400	10060	9255	0.0328
249	9665	-7715	210	9840	9430	10100	9275	0.0328
250	9695	-7745	215	9875	9455	10140	9295	0.0327
251	9730	-7780	220	9910	9480	10180	9315	0.0327
252	9760	-7810	220	9945	9510	10220	9335	0.0327
253	9790	-7840	225	9980	9540	10255	9360	0.0327
254	9820	-7870	230	10015	9570	10295	9380	0.0328
255	9850	-7900	230	10050	9595	10330	9405	0.0328
256	9880	-7930	235	10090	9625	10365	9425	0.0328
257	9910	-7960	240	10120	9650	10400	9445	0.0327
258	9940	-7990	240	10155	9680	10430	9470	0.0327
259	9970	-8020	245	10190	9710	10470	9495	0.0327
260	10000	-8050	245	10225	9740	10505	9525	0.0327
261	10035	-8085	250	10260	9770	10540	9550	0.0327
262	10065	-8115	250	10295	9800	10575	9575	0.0327
263	10095	-8145	250	10325	9830	10605	9595	0.0328
264	10125	-8175	255	10360	9860	10640	9620	0.0328
265	10155	-8205	255	10390	9890	10670	9650	0.0327
266	10185	-8235	255	10425	9920	10705	9675	0.0327
267	10215	-8265	255	10455	9950	10735	9705	0.0327
268	10245	-8295	255	10490	9980	10765	9730	0.0327
269	10275	-8325	260	10520	10010	10795	9755	0.0327
270	10310	-8360	260	10550	10045	10825	9785	0.0327
271	10340	-8390	260	10585	10080	10855	9815	0.0328
272	10370	-8420	260	10615	10110	10885	9845	0.0328
273	10400	-8450	260	10645	10145	10920	9870	0.0327
274	10430	-8480	260	10675	10175	10950	9900	0.0327
275	10460	-8510	260	10705	10210	10975	9925	0.0327
276	10490	-8540	260	10735	10240	11005	9955	0.0328
277	10520	-8570	260	10765	10275	11035	9985	0.0328
278	10550	-8600	260	10795	10305	11060	10010	0.0328
279	10585	-8635	255	10825	10340	11085	10040	0.0328
280	10615	-8665	255	10855	10375	11110	10070	0.0328
281	10645	-8695	255	10885	10410	11135	10100	0.0328
282	10675	-8725	255	10910	10445	11160	10125	0.0328
283	10705	-8755	255	10940	10480	11185	10155	0.0328
284	10735	-8785	250	10965	10510	11210	10180	0.0328
285	10765	-8815	250	10995	10545	11235	10210	0.0327
286	10795	-8845	250	11025	10580	11260	10240	0.0327
287	10825	-8875	245	11050	10620	11280	10270	0.0327
288	10855	-8905	245	11075	10655	11300	10300	0.0327
289	10890	-8940	240	11100	10690	11325	10325	0.0327
290	10920	-8970	240	11125	10730	11355	10355	0.0328
291	10950	-9000	235	11150	10765	11380	10385	0.0328
292	10980	-9030	230	11175	10805	11405	10415	0.0327
293	11010	-9060	230	11195	10840	11435	10450	0.0327
294	11040	-9090	225	11215	10880	11470	10490	0.0327
295	11070	-9120	225	11235	10915	11505	10530	0.0327
296	11100	-9150	220	11255	10950	11525	10575	0.0327
297	11130	-9180	215	11270	10990	11550	10620	0.0327
298	11165	-9215	210	11285	11030	11565	10670	0.0327
299	11195	-9245	205	11295	11070	11580	10720	0.0327
300	11225	-9275	200	11310	11105	11810	10785	0.0327
301	11255	-9305	195	11320	11140	12085	10850	0.0327
302	11285	-9335	190	11345	11175	12245	10970	0.0287
303	11315	-9365	185	11375	11215	12350	11120	0.0225	Y - 14C
304	11365	-9415	200	11425	11235	12365	11200	0.0185
305	11440	-9490	230	11495	11240	12300	11205	0.0166
306	11510	-9560	265	11560	11245	12230	11210	0.0146
307	11585	-9635	295	11650	11260	12265	11220	0.0138
308	11655	-9705	315	11755	11285	12365	11235	0.0138
309	11730	-9780	340	11860	11310	12465	11245	0.0138
310	11800	-9850	360	11960	11355	12560	11265	0.0138
311	11875	-9925	375	12065	11405	12660	11285	0.0138
312	11945	-9995	390	12165	11455	12755	11305	0.0138
313	12015	-10065	405	12270	11515	12850	11335	0.0138
314	12090	-10140	420	12370	11575	12945	11370	0.0138
315	12160	-10210	430	12470	11635	13045	11400	0.0138
316	12235	-10285	440	12560	11700	13135	11445	0.0138
317	12305	-10355	450	12650	11770	13225	11490	0.0138
318	12380	-10430	460	12735	11835	13315	11535	0.0138
319	12450	-10500	465	12825	11905	13405	11585	0.0138
320	12525	-10575	475	12915	11975	13490	11635	0.0138
321	12595	-10645	480	13005	12050	13575	11685	0.0138
322	12670	-10720	485	13090	12120	13660	11740	0.0138
323	12740	-10790	490	13170	12195	13745	11795	0.0138
324	12810	-10860	495	13255	12265	13825	11855	0.0138
325	12885	-10935	500	13335	12340	13905	11915	0.0138
326	12955	-11005	500	13415	12415	13980	11980	0.0138
327	13030	-11080	505	13495	12490	14055	12040	0.0138
328	13100	-11150	505	13570	12560	14130	12110	0.0138
329	13175	-11225	505	13650	12635	14210	12180	0.0138
330	13245	-11295	505	13725	12710	14285	12250	0.0138
331	13320	-11370	505	13800	12790	14350	12320	0.0138
332	13390	-11440	505	13875	12870	14420	12395	0.0138
333	13465	-11515	500	13950	12950	14490	12470	0.0138
334	13535	-11585	500	14020	13025	14560	12550	0.0138
335	13610	-11660	495	14090	13105	14630	12630	0.0138
336	13680	-11730	490	14155	13180	14690	12710	0.0138
337	13750	-11800	485	14230	13260	14750	12790	0.0138
338	13825	-11875	480	14300	13335	14810	12870	0.0138
339	13895	-11945	475	14365	13415	14870	12960	0.0138
340	13970	-12020	465	14430	13495	14925	13050	0.0138
341	14040	-12090	460	14495	13575	14985	13145	0.0138
342	14115	-12165	450	14560	13650	15035	13240	0.0138
343	14185	-12235	440	14620	13730	15090	13335	0.0138
344	14260	-12310	430	14685	13805	15140	13430	0.0138
345	14330	-12380	420	14770	13890	15180	13530	0.0138
346	14405	-12455	405	14865	13975	15220	13630	0.0138
347	14475	-12525	395	14955	14055	15255	13730	0.0138
348	14545	-12595	375	15015	14135	15285	13855	0.0138
349	14620	-12670	360	15075	14210	15310	13980	0.0138
350	14690	-12740	345	15130	14285	15335	14105	0.0139	Y - 14C
